# Supplementary material for: A cation-directed two-component cascade approach to enantioenriched pyrroloindolines
Source: Royal Society of Chemistry journal article supplement (doi:10.1039/c4cc06683a), 2014-09-15
Supplement: c4cc06683a1.pdf [file c4cc06683a1.pdf]

## **A Cation-Directed Two-Component Cascade Approach to Enantioenriched Pyrroloindolines**

### Table of Contents

|                                         |     |
|-----------------------------------------|-----|
| 1. General Information.....             | 2   |
| 2. Substrate Synthesis.....             | 3   |
| 2.1 Synthesis of Isocyanides.....       | 3   |
| 2.2 Synthesis of Michael Acceptors..... | 23  |
| 3. Diastereoselective Reaction.....     | 34  |
| 4. Enantioselective Reaction.....       | 48  |
| 5. NMR Spectra.....                     | 56  |
| 6. HPLC Traces.....                     | 108 |
| 7. Assignment of Stereochemistry .....  | 116 |
| 8. Thermodynamic Product.....           | 117 |
| 9. X-ray Crystallography.....           | 118 |

## 1. General information

All NMR spectra were recorded on Bruker AV400, AV500 and DRX500 spectrometers.  $^1\text{H}$  and  $^{13}\text{C}$  NMR spectral data are reported as chemical shifts ( $\delta$ ) in parts per million (ppm) relative to the solvent peak using the Bruker internal referencing procedure (edlock).  $^{19}\text{F}$  NMR spectra are referenced relative to  $\text{CFCl}_3$ . The following abbreviations are used to describe multiplicities s = singlet, d = doublet, t = triplet, q = quartet, pent = pentet, sept = septet, br = broad, m = multiplet. NMR spectra were processed in TopSpin 3.1. High resolution mass spectra (HRMS,  $m/z$ ) were recorded on a Bruker MicroTOF spectrometer using positive electrospray ionization (ESI), or on a Micromass GCT spectrometer using field ionization (EI/FI) or chemical ionization (CI). IR spectra were recorded on a Bruker Tensor 27 FT-IR spectrometer. Absorptions are measured in wavenumbers and only peaks of interest are reported. Melting points of solids were measured on a Griffin apparatus and are uncorrected. IUPAC names were obtained using the ACD/ILab service. Weighing was performed with a 4-decimal place balance. All solvents were dried on a column of alumina prior to use.

## 2.1 Synthesis of Isocyanides

**General Procedure A:** To a solution of the relevant formamide (1.0 eq) in DCM (1.4 mL/mmol substrate) at 0 °C, triethylamine (2.5 eq) was added. POCl<sub>3</sub> (1.0 eq) was then added dropwise, and the reaction mixture was left to stir at 0 °C for 90 min. The reaction was quenched with 10% aqueous sodium carbonate solution and stirred for a further 10 min. The mixture was then diluted with water (5 mL/mmol substrate) and extracted with DCM (3 x 5 mL/mmol substrate). The organic phases were combined, dried over K<sub>2</sub>CO<sub>3</sub> and concentrated *in vacuo*.

**General procedure B:** Methyl isocyanoacetate (1.0 eq) was dissolved in DMSO (6.0 mL/mmol substrate) at room temperature. Cesium carbonate (1.5 eq) was added, and the reaction mixture was stirred for 10 min. The relevant fluoronitrobenzene (1.3 eq) was added, and the mixture was stirred for 16 h at room temperature. The mixture was then diluted with water (10 mL/mmol substrate) and extracted with ethyl acetate (3 x 10 mL/mmol substrate). The organic phases were combined, dried over anhydrous MgSO<sub>4</sub> and concentrated *in vacuo*.

**General Procedure C:** Compounds were prepared by modification of a known procedure (Carney, D. W.; Truong, J. V; Sello, J. K. *J. Org. Chem.* **2011**, 76, 10279–10285). *N,N'*-Dicyclohexylcarbodiimide (DCC) (1.3 mmol) was dissolved in DCM at 0 °C and formic acid (1.3 mmol) was added dropwise. Upon addition, a precipitate was formed and the reaction mixture was stirred for additional 10 min. The relevant amino acid methyl ester hydrochloride (1.0 mmol), 4-dimethylaminopyridine (DMAP) (0.2 mmol) and Et<sub>3</sub>N (1.6 mmol) were added, and the mixture was stirred at room temperature overnight. The reaction was concentrated *in vacuo* and the residue was suspended in EtOAc, filtered through a short silica column and evaporated under reduced pressure. Crude formamide was

dissolved in THF at 0 °C under an argon atmosphere and Et<sub>3</sub>N (5 mmol) was added. POCl<sub>3</sub> (1.5 mmol) was added dropwise over the course of 10 min and the reaction mixture was stirred for 2 hours. The reaction was quenched with 10 % Na<sub>2</sub>CO<sub>3</sub> and was stirred for additional 10 min. The reaction mixture was diluted with EtOAc and washed with brine and water. The organic layer was dried over anhydrous MgSO<sub>4</sub> and concentrated *in vacuo*. Pure product was obtained by flash chromatography.

### (Isocyanomethylene)dibenzene

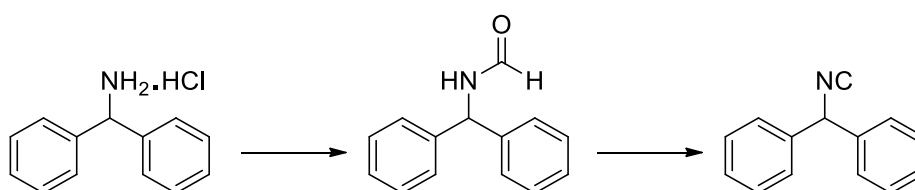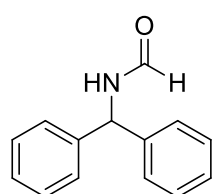

To a suspension of diphenylmethanamine hydrochloride (2.20 g, 10.0 mmol) in ethyl formate (30 mL), triethylamine (2.79 mL, 20.0 mmol) and DMAP (100 mg, 0.819 mmol) were added. The reaction mixture was stirred at 50 °C for 48 h. The mixture was then diluted with ethyl acetate (50 mL) and washed with 1 M hydrochloric acid solution (2 x 50 mL). The organic phases were combined, dried over anhydrous MgSO<sub>4</sub> and concentrated *in vacuo* to afford *N*-benzhydrylformamide as a white solid (2.10 g, 99%), which was used without further purification.

<sup>1</sup>H NMR (400 MHz, CDCl<sub>3</sub>) δ 8.27 (1H, s), 7.39-7.24 (10H, m), 6.52 (1H, br s), 6.34 (1H, d, *J* 8.2).

<sup>13</sup>C NMR (101 MHz, CDCl<sub>3</sub>) δ 160.3, 140.9, 128.8, 127.7, 127.4, 55.7.

m.p. 132-133 °C (lit. 135 °C).



Data in accordance with literature (M. Vamos, K. Welsh, D. Finlay, P. S. Lee, P. D. Mace, S. J. Snipas, M. L. Gonzalez, S. R. Ganji, R. J. Ardecky, S. J. Riedl, G. S. Salvesen, K. Vuori, J. C. Reed, N. D. P. Cosford, *ACS Chem. Biol.* **2013**, 8, 725).

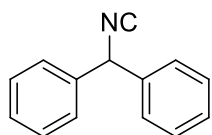

This compound was prepared according to general procedure A, using *N*-benzhydrylformamide (1.00 g, 4.74 mmol). Column chromatography (petrol:ethyl acetate [19:1]) afforded the title compound as a white solid (871 mg, 95%).

$^1\text{H}$  NMR (400 MHz,  $\text{CDCl}_3$ )  $\delta$  7.45-7.34 (10H, m), 5.94 (1H, s).

$^{13}\text{C}$  NMR (101 MHz,  $\text{CDCl}_3$ )  $\delta$  158.3, 137.6, 129.0, 128.5, 126.6, 62.0 (t,  $J$  6.6).

m.p. 46-47 °C.

Data in accordance with literature (M. Vamos, K. Welsh, D. Finlay, P. S. Lee, P. D. Mace, S. J. Snipas, M. L. Gonzalez, S. R. Ganji, R. J. Ardecky, S. J. Riedl, G. S. Salvesen, K. Vuori, J. C. Reed, N. D. P. Cosford, *ACS Chem. Biol.* **2013**, 8, 725).

#### 4,4'-(Isocyanomethylene)bis(methylbenzene)

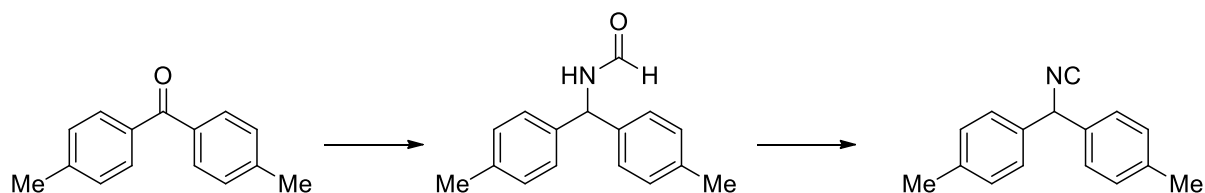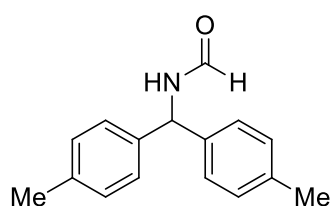

To a solution of di-*p*-tolylmethanone (5.00 g, 23.8 mmol) in formamide (4.73 mL, 119 mmol), formic acid (1.12 mL, 29.7 mmol) was added, and

the reaction was stirred at 170 °C for 12 h. The reaction mixture was then allowed to cool to room temperature and dissolved in ethyl acetate. The organic phase was washed with brine, dried over anhydrous Na<sub>2</sub>SO<sub>4</sub> and concentrated *in vacuo*. Recrystallisation from chloroform/hexanes afforded *N*-(di-*p*-tolylmethyl)formamide as a colourless solid (5.57 g, 98%).

<sup>1</sup>H NMR (400 MHz, CDCl<sub>3</sub>) δ 8.22 (1H, s), 7.21-7.11 (8H, m), 6.62 (1H, d, *J* 7.7, *NH*), 6.25 (1H, d, *J* 8.3), 2.36 (6H, s).

<sup>13</sup>C NMR (101 MHz, CDCl<sub>3</sub>) δ 160.3, 138.3, 137.2, 129.4, 127.3, 55.2, 21.1.

m.p. 117-118 °C (lit. 113-114 °C).

*Data in accordance with literature (A. A. Bakibaev, L. G. Tignibidina, V. D. Filimonov, A. V. Pustovoitov, V. K. Gorshkova, A. S. Saratikov, V. A. Krasnov, Pharmaceutical Chemistry Journal, 1989, 23 (12), 978-982).*

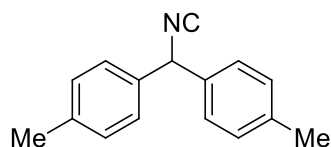

This compound was prepared according to general procedure A, using *N*-(di-*p*-tolylmethyl)formamide (1.00 g, 4.18 mmol). Column chromatography (petrol:ethyl acetate [9:1]) afforded the title compound as a white solid (630 mg, 68%).

<sup>1</sup>H NMR (400 MHz, CDCl<sub>3</sub>) δ 7.23 (4H, d, *J* 8.0), 7.16 (4H, d, *J* 8.0), 5.83 (1H, s), 2.33 (6H, s).

<sup>13</sup>C NMR (101 MHz, CDCl<sub>3</sub>) δ 157.8, 138.3, 135.0, 129.6, 126.5, 61.6 (t, *J* 6.3), 21.1.

m.p. 53-54 °C (lit. 57-58 °C).

*Data in accordance with literature (L. B. Engemyr, A. Martinsen, J. Songstad, Acta Chemica Scandinavica A 1974, 255-266).*

#### 4,4'-(Isocyanomethylene)bis(chlorobenzene)

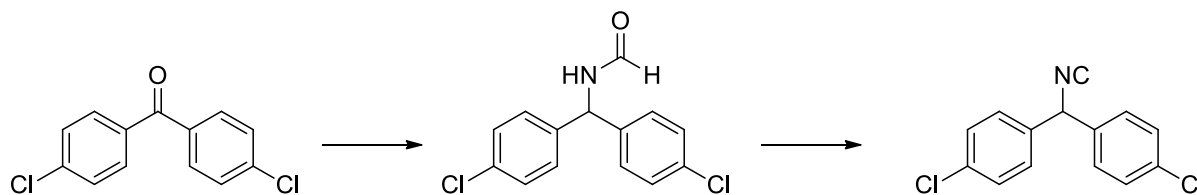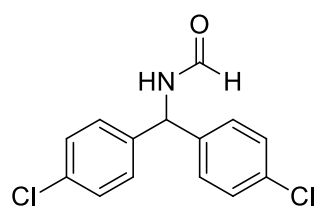

To a solution of bis(4-chlorophenyl)methanone (5.00 g, 19.9 mmol) in formamide (3.95 mL, 99.5 mmol), formic acid (938  $\mu$ L, 24.9 mmol) was added, and the reaction was stirred at 170  $^{\circ}$ C for 12 h. The reaction mixture was then allowed to cool to room temperature and dissolved in

ethyl acetate. The organic phase was washed with brine, dried over anhydrous  $\text{Na}_2\text{SO}_4$  and concentrated *in vacuo*. Recrystallisation from chloroform/hexanes afforded N-(bis(4-chlorophenyl)methyl)formamide as a colourless solid (3.85 g, 69%).

$^1\text{H}$  NMR (400 MHz,  $\text{DMSO-d}_6$ )  $\delta$  9.17 (1H, d,  $J$  8.5, NH), 8.19 (1H, s), 7.42 (4H, d,  $J$  8.4), 7.32 (4H, d,  $J$  8.4), 6.23 (1H, d,  $J$  8.7).

$^{13}\text{C}$  NMR (101 MHz,  $\text{DMSO-d}_6$ )  $\delta$  160.8, 141.2, 132.4, 129.5, 129.0, 53.8.

m.p. 129-131  $^{\circ}$ C (lit. 125-126  $^{\circ}$ C).

Data in accordance with literature (A. A. Bakibaev, L. G. Tignibidina, V. D. Filimonov, A. V. Pustovoitov, V. K. Gorshkova, A. S. Saratikov, V. A. Krasnov, *Pharmaceutical Chemistry Journal* **1989**, 23 (12), 978-982).

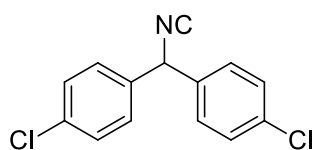

This compound was prepared according to general procedure A, using N-(bis(4-chlorophenyl)methyl)formamide (1.00 g, 3.57 mmol). Column chromatography (petrol:ethyl acetate [9:1]) afforded the title

compound as a white solid (851 mg, 91%).

IR (neat)  $\nu_{\max}$  2974, 2151, 1128, 875  $\text{cm}^{-1}$ .

$^1\text{H}$  NMR (400 MHz,  $\text{CDCl}_3$ )  $\delta$  7.36 (4H, d,  $J$  8.4), 7.27 (4H, d,  $J$  8.4), 5.86 (1H, s).

$^{13}\text{C}$  NMR (101 MHz,  $\text{CDCl}_3$ )  $\delta$  159.5, 135.6, 134.8, 129.3, 128.0, 60.7 (t,  $J$  5.1).

$m/z$  HRMS (ESI $^+$ ) 284.0012 ( $[\text{M}+\text{Na}]^+$ ,  $\text{C}_{14}\text{H}_9\text{Cl}_2\text{NNa}$  requires 284.0004).

m.p. 78-81  $^\circ\text{C}$ .

### 9-Isocyano-9H-fluorene

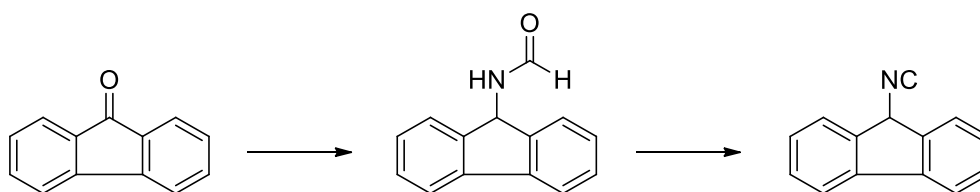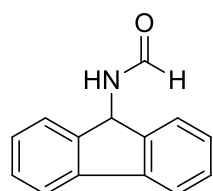

To a solution of 9-fluorenone (5.00 g, 27.7 mmol) in formamide (11.0 mL, 227 mmol), formic acid (1.31 mL, 34.7 mmol) was added, and the reaction was stirred at 170  $^\circ\text{C}$  for 12 h. The reaction was then removed from the heat source and solidified after 1 minute. The resulting solid was dissolved in hot ethyl acetate (500 mL), washed with brine (2 x 100 mL), dried over anhydrous  $\text{MgSO}_4$  and concentrated *in vacuo*. Recrystallisation from ethyl acetate afforded *N*-(9H-fluoren-9-yl)formamide as a white solid (2.03 g, 35%).

$^1\text{H}$  NMR (400 MHz,  $\text{CDCl}_3$ )  $\delta$  8.51 (1H, s), 7.71 (2H, d,  $J$  7.5), 7.59 (2H, dd,  $J$  7.4, 0.6), 7.43 (2H, t,  $J$  7.4), 7.34 (2H, td,  $J$  7.4, 1.1), 6.30 (1H, d,  $J$  9.0), 5.88 (1H, br s).

$^{13}\text{C}$  NMR (101 MHz,  $\text{CDCl}_3$ )  $\delta$  161.7, 143.7, 140.7, 128.9, 127.9, 125.1, 120.1, 53.3.

m.p. 191-194 °C (lit. 209 °C).

Data in accordance with literature (R. S. Bon, C. Hong, M. J. Bouma, R. F. Schmitz, F. J. J. de Kanter, M. Lutz, A. L. Speck, R. V. A. Orru, *Org. Lett.* **2003**, 5, 3759).

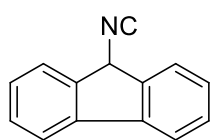

To a solution of *N*-(9H-fluoren-9-yl)formamide (350 mg, 1.67 mmol) in THF (2 mL) at -78 °C, triethylamine (1.2 mL, 8.37 mmol) was added, followed by POCl<sub>3</sub> (172 µL, 1.85 mmol) as a solution in THF (2 mL). The reaction mixture was allowed to warm to RT and stirred for 1 h, before ice water (40 mL) was added. The reaction was then extracted into ether, washed with brine, dried over anhydrous Na<sub>2</sub>SO<sub>4</sub> and concentrated *in vacuo*. Column chromatography (petrol:ethyl acetate [9:1]) afforded the title compound as a yellow solid (275 mg, 86%).

<sup>1</sup>H NMR (400 MHz, CDCl<sub>3</sub>) δ 7.74-7.70 (4H, m), 7.49 (2H, t, *J* 7.4), 7.41 (2H, td, *J* 7.5, 1.0), 5.64 (1H, s).

<sup>13</sup>C NMR (101 MHz, CDCl<sub>3</sub>) δ 157.8, 140.2, 139.6, 129.8, 128.3, 124.9, 120.4, 56.8 (t, *J* 6.8).

m.p. 92-94 °C (lit. 87-91 °C).

Data in accordance with literature (R. S. Bon, C. Hong, M. J. Bouma, R. F. Schmitz, F. J. J. de Kanter, M. Lutz, A. L. Speck, R. V. A. Orru, *Org. Lett.* **2003**, 5, 3759).

### Methyl 2-(5-fluoro-2-nitrophenyl)-2-isocyanoacetate (23)

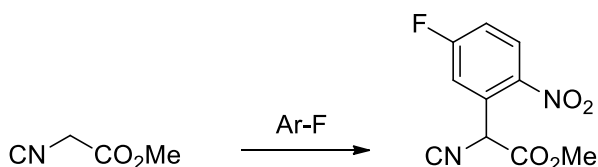

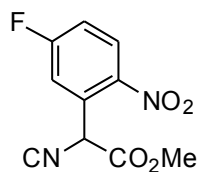

Prepared according to general procedure B using methyl 2-isocyanoacetate (832  $\mu\text{L}$ , 9.15 mmol). Column chromatography (petrol:ethyl acetate [4:1]) afforded the title compound **23** as yellow oil (1.35 g, 62%).

$\nu_{\text{max}}$  (neat): 2960, 2148, 1758, 1594, 1532, 1348, 1231, 752  $\text{cm}^{-1}$ .

$^1\text{H}$  NMR (400 MHz,  $\text{CDCl}_3$ )  $\delta$  8.37-8.28 (1H, m), 7.65-7.57 (1H, m), 7.34 (1H, ddd,  $J$  12.3, 7.5, 4.1), 6.44 (1H, s), 3.89 (3H, s).

$^{13}\text{C}$  NMR (101 MHz,  $\text{CDCl}_3$ )  $\delta$  166.8, 164.2, 164.1, 143.0, 130.3 (d,  $J$  9.0), 128.9 (d,  $J$  10.0), 117.6 (d,  $J$  23.0), 116.9 (d,  $J$  26.3), 57.3, 54.4.

$^{19}\text{F}$  NMR (377 MHz,  $\text{CDCl}_3$ ,  $\{^1\text{H}\}$ )  $\delta$  -99.5.

HRMS (ESI): found 261.0270;  $\text{C}_{10}\text{H}_7\text{FN}_2\text{NaO}_4$   $[\text{M}+\text{Na}^+]$  requires 261.0282.

### Methyl 2-isocyano-3-methylbutanoate

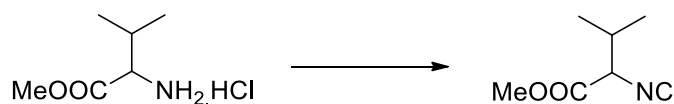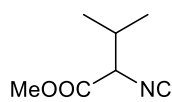

Prepared according to general procedure C using valine methyl ester hydrochloride (1.00 g, 5.95 mmol). Column chromatography (petrol:ethyl acetate [4:1]) afforded the title compound as a colourless oil (570 mg, 68%).

$^1\text{H}$  NMR (400 MHz,  $\text{CDCl}_3$ )  $\delta$  4.12 (1H, d,  $J$  4.2), 3.76 (3H, s), 2.35-2.19 (1H, m), 1.04 (3H, d,  $J$  6.8), 0.94 (3H, d,  $J$  6.7).

$^{13}\text{C}$  NMR (101 MHz,  $\text{CDCl}_3$ )  $\delta$  166.9, 160.5, 62.9, 53.2, 31.2, 19.3, 16.7.

Data in accordance with literature (P. C. J. Kamer, M. C. Cleij, R. J. M. Nolte, T. Harada, A. M. F. Hezemans, W. Drenth; *J. Am. Chem. Soc.*, **1988**, 110, 1581–1587).

### Methyl 2-isocyano-3-phenylpropanoate

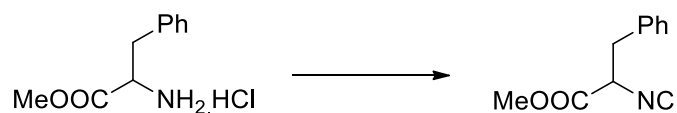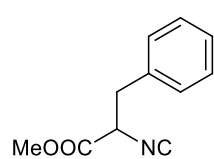

Prepared according to general procedure C using phenylalanine methyl ester hydrochloride (910 mg, 4.21 mmol). Column chromatography (petrol:ethyl acetate [4:1]) afforded the title compound as a colourless oil (581 mg, 73%).

$^1\text{H}$  NMR (400 MHz,  $\text{CDCl}_3$ )  $\delta$  7.31–7.15 (5H, m), 4.39 (1H, dd,  $J$  8.3, 4.8), 3.72 (3H, s), 3.19 (1H, dd,  $J$  13.9, 4.8), 3.07 (1H, dd,  $J$  13.8, 8.4).

$^{13}\text{C}$  NMR (101 MHz,  $\text{CDCl}_3$ )  $\delta$  166.6, 161.0, 134.4, 129.3, 128.9, 127.9, 58.0, 53.4, 38.9.

Data in accordance with literature (D. W. Carney, J. V. Truong, J. K. Sello; *J. Org. Chem.* **2011**, 76 (24), 10279–10285).

### Methyl 2-isocyano-2-(5-methyl-2-nitrophenyl)acetate

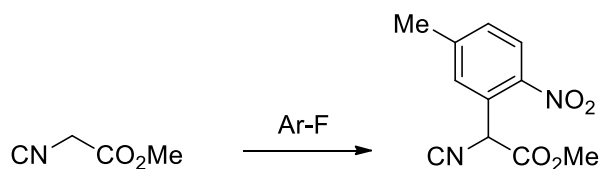

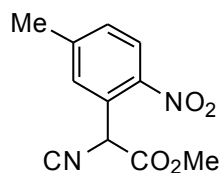

Prepared according to general procedure B using methyl 2-isocyanoacetate (909  $\mu\text{L}$ , 10.0 mmol). Column chromatography (petrol:ethyl acetate [9:1]) afforded the title compound as yellow oil (1.51 g, 65 % yield).

$^1\text{H}$  NMR (400 MHz,  $\text{CDCl}_3$ )  $\delta$  8.14 (1H, d,  $J$  8.4), 7.64 (1H, s), 7.44 (1H, dd,  $J$  8.4, 1.0), 6.41 (1H, s), 3.86 (3H, s), 2.56 (3H, s).

$^{13}\text{C}$  NMR (101 MHz,  $\text{CDCl}_3$ )  $\delta$  164.8, 162.9, 146.3, 144.7, 131.1, 129.8, 126.7, 126.0, 57.3, 54.1, 21.7.

$\nu_{\text{max}}$  (neat): 2977, 2154, 1729, 1589, 1538, 1354, 1231, 827  $\text{cm}^{-1}$ .

HRMS (ESI): found 257.0538;  $\text{C}_{11}\text{H}_{10}\text{N}_2\text{NaO}_4$  [ $\text{M}+\text{Na}^+$ ] requires 257.0533.

#### Methyl 2-isocyano-2-(2-(trifluoromethyl)phenyl)acetate

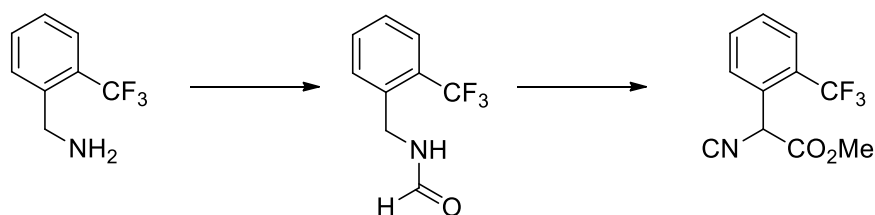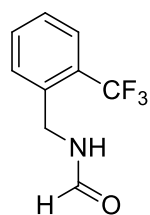

To a solution of (2-(trifluoromethyl)phenyl)methanamine (1.20 g, 6.85 mmol) in ethyl formate (5.0 mL), triethylamine (1.10 mL, 7.54 mmol) was added, and the reaction mixture was stirred and heated to reflux for 48 h. The mixture was then allowed to cool to room temperature and concentrated *in vacuo*. Column chromatography (petrol:ethyl acetate [1:1]) afforded *N*-(2-(trifluoromethyl)benzyl)formamide as a colourless oil (715 mg, 51%).

$^1\text{H}$  NMR (400 MHz,  $\text{CDCl}_3$ )  $\delta$  8.27 (1H, s), 7.67 (1H, d,  $J$  7.9), 7.62-7.52 (2H, m), 7.42 (1H, t,  $J$  7.4), 6.19 (1H, br s), 4.67 (2H, d,  $J$  6.2).



$^{13}\text{C}$  NMR (101 MHz,  $\text{CDCl}_3$ )  $\delta$  161.1, 136.0 (q,  $J$  2.5), 132.4, 130.9, 128.2 (q,  $J$  30.4), 127.8, 126.0 (q,  $J$  5.7), 124.5 (q,  $J$  273.1), 38.7 (q,  $J$  2.1).

$^{19}\text{F}$  NMR (377 MHz,  $\text{CDCl}_3$ )  $\delta$  -59.4 (m).

Data in accordance with literature (Kolycheva, M. T.; Gerus, I. I.; Kukhar, V. P. *Journal of Organic Chemistry USSR (English Translation)*, **1989**, 25, 2134-2138).

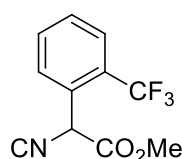

To a solution of *N*-(2-(trifluoromethyl)benzyl)formamide (700 mg, 3.29 mmol) in DCM (4 mL) at 0 °C,  $\text{Et}_3\text{N}$  (1.14 mL, 8.22 mmol) was added, and then  $\text{POCl}_3$  (307  $\mu\text{L}$ , 3.29 mmol) dropwise. The reaction was stirred for 90 min. Saturated sodium carbonate solution (5 mL) was then added and stirring was continued for 30 min, before water (8 mL) was added. The aqueous phase was extracted with DCM and the combined organic extracts were washed with brine, dried over anhydrous  $\text{MgSO}_4$  and concentrated *in vacuo*. The crude residue was then dissolved in THF (10 mL) and cooled to -78 °C, before the dropwise addition of LiHMDS (1.21 g, 7.24 mmol) in toluene (7.2 mL). The reaction mixture was left to stir at -78 °C for 1h, after which dimethyl carbonate (332  $\mu\text{L}$ , 3.95 mmol) was added and the reaction was allowed to warm to room temperature. The crude mixture was concentrated *in vacuo*, before the residue was diluted with ethyl acetate (35 mL) and washed with saturated aqueous ammonium chloride solution (35 mL), brine (35 mL) and water (35 mL). The organic phases were combined, dried over anhydrous  $\text{MgSO}_4$  and concentrated *in vacuo*. Column chromatography (petrol:ethyl acetate [9:1]) afforded the title compound as a brown oil (267 mg, 33%).

IR (neat)  $\nu_{\text{max}}$  3025, 2157, 1612, 1487, 1046  $\text{cm}^{-1}$ .

$^1\text{H}$  NMR (400 MHz,  $\text{CDCl}_3$ )  $\delta$  7.79 (1H, d,  $J$  7.6), 7.77 (1H, d,  $J$  7.6), 7.71 (1H, t,  $J$  7.6), 7.59 (1H, t,  $J$  7.6), 5.78 (1H, s), 3.84 (3H, s).

$^{13}\text{C}$  NMR (101 MHz,  $\text{CDCl}_3$ )  $\delta$  165.5, 161.6, 133.1, 130.8, 130.0, 129.1, 128.2 (q,  $J$  31.3), 126.5 (q,  $J$  5.4), 123.6 (q,  $J$  273.2), 55.8, 54.0.

$^{19}\text{F}$  NMR (377 MHz,  $\text{CDCl}_3$ )  $\delta$  -58.4 (m).

$m/z$  HRMS ( $\text{ESI}^+$ ) 266.0398 ( $[\text{M}+\text{Na}]^+$ ,  $\text{C}_{11}\text{H}_8\text{F}_3\text{NO}_2\text{Na}$  requires 266.0399).

### Methyl 2-isocyano-2-(2-methoxyphenyl)acetate

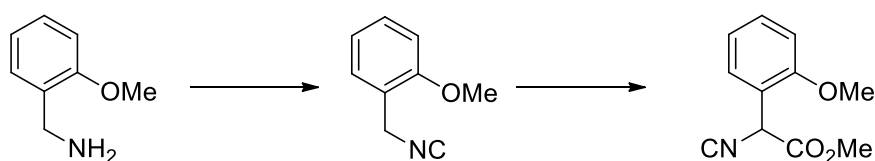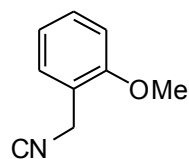

(2-Methoxyphenyl)methanamine (1.31 mL, 10.0 mmol) was dissolved in formic acid (20 mL) at room temperature. Acetic anhydride (1.42 mL, 15.0 mmol) was added dropwise over 2 h, and the mixture was stirred for 16 h. The crude mixture was concentrated *in vacuo*, and the residue was then dissolved in ethyl acetate (20 mL) and filtered through a short silica column. Under an atmosphere of argon, the mixture was dissolved in THF (20 mL) and cooled to 0 °C. Triethylamine (7.00 mL, 50.0 mmol) was added, and then  $\text{POCl}_3$  (1.40 mL, 15.0 mmol) was added dropwise over 10 min. The reaction mixture left to stir at 0 °C. After 2 h, the reaction was quenched with 10% aqueous sodium carbonate solution, and stirred for a further 10 min. The mixture was concentrated *in vacuo*, before column chromatography (petrol:ethyl acetate [8:1]) afforded 1-(isocyanomethyl)-2-methoxybenzene as a colourless oil (1.07 g, 73%).

IR (neat)  $\nu_{\text{max}}$  2150, 1604, 1495, 1464, 1249, 1113, 1027  $\text{cm}^{-1}$ .

$^1\text{H}$  NMR (400 MHz,  $\text{CDCl}_3$ )  $\delta$  7.46 (1H, d,  $J$  7.5), 7.41-7.35 (1H, m), 7.05 (1H, app. t,  $J$  7.5), 6.93 (1H, d,  $J$  8.2), 4.66 (2H, s), 3.88 (3H, s).

$^{13}\text{C}$  NMR (101 MHz,  $\text{CDCl}_3$ )  $\delta$  157.1, 156.3, 129.7, 127.7, 120.8, 120.7, 110.3, 55.4, 41.2.

HRMS ( $\text{ESI}^+$ ) 170.0575 ( $[\text{M}+\text{Na}]^+$ ,  $\text{C}_9\text{H}_9\text{NONa}$  requires 170.0582).

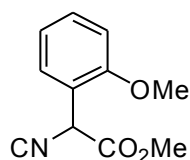

1-(Isocyanomethyl)-2-methoxybenzene (200 mg, 1.36 mmol) was dissolved in THF (5.5 mL) at  $-78^\circ\text{C}$ . LiHMDS (502 mg, 3.00 mmol) in THF (3.0 mL) was added dropwise over 10 min, and the reaction mixture was left to stir at  $-78^\circ\text{C}$ . After 1 h

dimethyl carbonate (137  $\mu\text{L}$ , 1.63 mmol) was added, and the reaction was allowed to warm to room temperature. The crude mixture was concentrated *in vacuo*, before the residue was diluted with ethyl acetate (15 mL) and washed with saturated aqueous ammonium chloride solution (15 mL), brine (15 mL) and water (15 mL). The organic phases were combined, dried over anhydrous  $\text{MgSO}_4$  and concentrated *in vacuo*. Column chromatography (petrol:ethyl acetate [5:1]) afforded the title compound as a light yellow oil (170 mg, 61%).

IR (neat)  $\nu_{\text{max}}$  3027, 2151, 1602, 1495, 1030, 726  $\text{cm}^{-1}$ .

$^1\text{H}$  NMR (400 MHz,  $\text{CDCl}_3$ )  $\delta$  7.47-7.37 (2H, m), 7.04 (1H, app. t,  $J$  7.5), 6.96 (1H, d,  $J$  8.3), 5.76 (1H, s), 3.89 (3H, s), 3.80 (3H, s).

$^{13}\text{C}$  NMR (101 MHz,  $\text{CDCl}_3$ )  $\delta$  166.4, 159.7, 156.2, 131.4, 128.3, 121.2, 121.1, 111.3, 55.9, 54.8, 53.6.

HRMS ( $\text{ESI}^+$ ) 228.0630 ( $[\text{M}+\text{Na}]^+$ ,  $\text{C}_{11}\text{H}_{11}\text{NO}_3\text{Na}$  requires 228.0637).

### Methyl 2-isocyano-2-(2-nitrophenyl)acetate

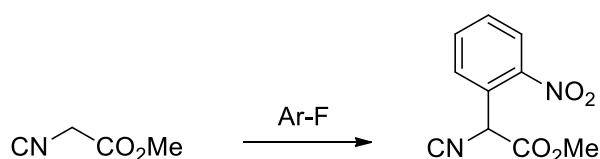

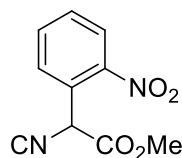

Prepared according to general procedure B, using 1-fluoro-2-nitrobenzene (1.37 mL, 13.0 mmol). Column chromatography (petrol:ethyl acetate [17:3]) afforded the title compound as a brown oil (1.29 g, 58%).

$^1\text{H}$  NMR (400 MHz,  $\text{CDCl}_3$ )  $\delta$  8.23 (1H, dd,  $J$  8.2, 1.2), 7.89 (1H, dd,  $J$  7.8, 1.4), 7.83 (1H, td,  $J$  7.8, 1.3), 7.68 (1H, ddd,  $J$  8.1, 7.5, 1.5), 6.42 (1H, s), 3.87 (3H, s).

$^{13}\text{C}$  NMR (101 MHz,  $\text{CDCl}_3$ )  $\delta$  164.7, 163.2, 147.0, 134.6, 130.7, 129.3, 126.8, 125.8, 57.2, 54.2.

Data in accordance with literature (T. Buyck, Q. Wang, J. Zhu, *Angew. Chem. Int. Ed.* **2013**, 52, 12714).

#### Benzyl 2-(5-fluoro-2-nitrophenyl)-2-isocyanoacetate

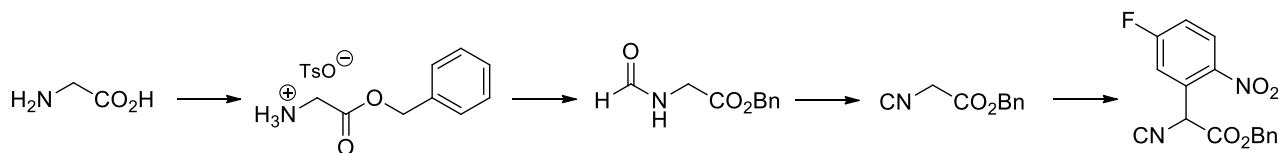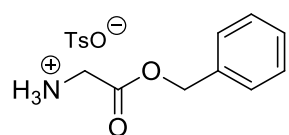

To a suspension of glycine (1.20 g, 16.0 mmol) in benzyl alcohol (32 mL), tosylic acid (2.74 g, 16.0 mmol) was added. The reaction was stirred at 80 °C, before tosyl chloride (3.43 g, 18.0 mmol) was added portionwise. Stirring was continued at 80 °C for 2 h before cooling to room temperature. Ether was then carefully added until precipitation was witnessed, at which point the flask was placed in a freezer for 24 h. The resultant solid was filtered and recrystallised from ethanol/ether to afford 2-(benzyloxy)-2-oxoethanaminium tosylate as a white solid (2.24 g, 41%).

$^1\text{H}$  NMR (400 MHz, DMSO- $d_6$ )  $\delta$  8.26 (3H, br s), 7.50 (2H, d,  $J$  7.8), 7.46-7.35 (5H, m), 7.13 (2H, d,  $J$  7.8), 5.25 (2H, s), 3.92 (2H, s), 2.30 (3H, s).

$^{13}\text{C}$  NMR (101 MHz, DMSO- $d_6$ )  $\delta$  168.1, 146.1, 138.2, 135.7, 129.0, 128.9, 128.7, 128.6, 126.0, 67.3, 40.2, 21.3.

m.p. 132-133 °C (lit. 131-133 °C).

Data in accordance with literature (D.H. Burns, C.S. Jabara, M.W. Burden, *Synthetic Communications* **1995**, 25, 379-387).

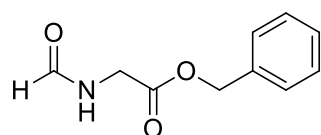

To a suspension of 2-(benzyloxy)-2-oxoethanaminium tosylate (930 mg, 2.76 mmol) in ethyl formate (2.5 mL), triethylamine (423  $\mu\text{L}$ , 3.03 mmol) was added, and the reaction mixture was stirred and heated to reflux for 48 h. The mixture was then allowed to cool to room temperature and concentrated *in vacuo*. Column chromatography (petrol:ethyl acetate [1:1]) afforded benzyl 2-formamidoacetate as a colourless oil (416 mg, 78%).

$^1\text{H}$  NMR (400 MHz,  $\text{CDCl}_3$ )  $\delta$  8.26 (1H, s), 7.42-7.34 (5H, m), 6.39 (1H, br s), 5.23 (2H, s), 4.15 (2H, d,  $J$  5.4).

$^{13}\text{C}$  NMR (101 MHz,  $\text{CDCl}_3$ )  $\delta$  169.4, 161.2, 135.0, 128.7, 128.7, 128.5, 67.4, 40.0.

Data in accordance with literature (C. L. Allen, B. N. Atkinson, J. M. J. Williams, *Angew. Chem. Int. Ed.* **2012**, 51, 1383).

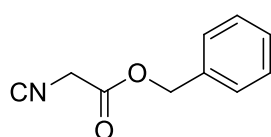

Prepared according to general procedure A using benzyl 2-formamidoacetate (400 mg, 2.07 mmol). The crude compound (368 mg,

99%) was used without further purification.

$^1\text{H}$  NMR (400 MHz,  $\text{CDCl}_3$ )  $\delta$  7.42-7.36 (5H, m), 5.26 (2H, s), 4.27 (2H, s).

$^{13}\text{C}$  NMR (101 MHz,  $\text{CDCl}_3$ )  $\delta$  163.8, 161.6, 134.4, 129.0, 128.8, 128.7, 68.4, 43.6.

Data in accordance with literature (D. H. Burns, C. S. Jabora, M. W. Burden, *Synth. Commun.* **1995**, 25, 379).

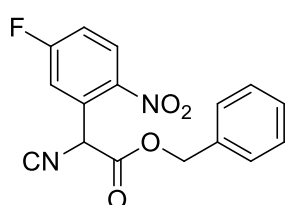

Prepared according to general procedure B using benzyl 2-isocyanoacetate (365 mg, 2.08 mmol). Column chromatography (petrol:ethyl acetate [17:3]) afforded the title compound as a brown oil (430 mg, 66%).

IR (neat)  $\nu_{\text{max}}$  3006, 2152, 1594, 1342, 1277, 1210, 978  $\text{cm}^{-1}$ .

$^1\text{H}$  NMR (400 MHz,  $\text{CDCl}_3$ )  $\delta$  8.29 (1H, dd,  $J$  9.2, 5.0), 7.57 (1H, dd,  $J$  8.7, 2.7), 7.41-7.28 (6H, m), 6.45 (1H, s), 5.26 (2H, s).

$^{13}\text{C}$  NMR (101 MHz,  $\text{CDCl}_3$ )  $\delta$  164.8 (d,  $J$  261.0), 164.1, 164.1 (d,  $J$  2.0), 163.4, 134.0, 130.3 (d,  $J$  9.1), 129.0, 128.9 (d,  $J$  10.3), 128.8, 128.4, 117.5 (d,  $J$  23.0), 116.8 (d,  $J$  26.0), 69.4, 57.5.

$^{19}\text{F}$  NMR (377 MHz,  $\text{CDCl}_3$ ,  $\{^1\text{H}\}$ )  $\delta$  -99.6.

$m/z$  HRMS ( $\text{ESI}^+$ ) 337.0599 ( $[\text{M}+\text{Na}]^+$ ,  $\text{C}_{16}\text{H}_{11}\text{F}_2\text{N}_2\text{O}_4\text{Na}$  requires 337.0595).

#### Isopropyl 2-(5-fluoro-2-nitrophenyl)-2-isocyanoacetate

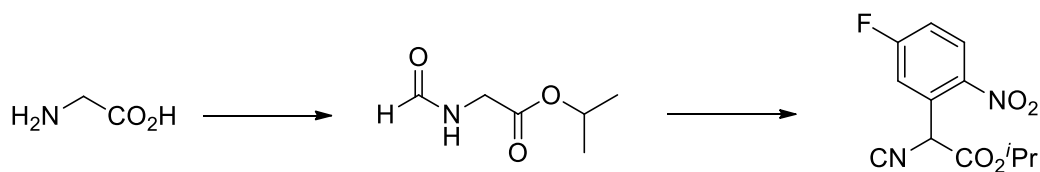

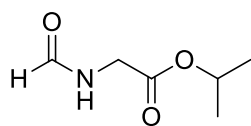

To a solution of glycine (2.40 g, 32.0 mmol) in isopropyl alcohol (50 mL), thionyl chloride (4.60 mL, 64.0 mmol) was added, and the reaction was heated at reflux for 12 h. The reaction mixture was then cooled to room temperature and concentrated *in vacuo* to furnish a sticky oil. The crude residue was suspended in ethyl formate (21 mL), and triethylamine (4.9 mL, 35.0 mmol) was then added. The reaction was heated at reflux for 48 h, before cooling to room temperature and concentrating *in vacuo*. Column chromatography (petrol:ethyl acetate [1:1]) afforded isopropyl 2-formamidoacetate as a colourless oil (4.07 g, 88%).

IR (neat)  $\nu_{max}$  3348, 2989, 1726, 1579, 1202, 1116, 1037  $\text{cm}^{-1}$ .

$^1\text{H}$  NMR (400 MHz,  $\text{CDCl}_3$ )  $\delta$  8.23 (1H, s), 6.48 (1H, br s), 5.06 (1H, sept,  $J$  6.3), 4.02 (2H, dd,  $J$  5.4, 0.8), 1.25 (6H, d,  $J$  6.3).

$^{13}\text{C}$  NMR (101 MHz,  $\text{CDCl}_3$ )  $\delta$  169.1, 161.2, 69.6, 40.2, 21.7.

$m/z$  HRMS ( $\text{ESI}^+$ ) 168.0639 ( $[\text{M}+\text{Na}]^+$ ,  $\text{C}_6\text{H}_{11}\text{F}_3\text{NO}_3\text{Na}$  requires 168.0631).

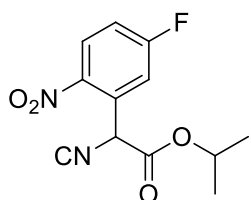

To a solution of isopropyl 2-formamidoacetate (2.00 g, 13.8 mmol) in DCM (15 mL) at 0 °C, triethylamine (4.90 mL, 34.5 mmol) was added, and then  $\text{POCl}_3$  (1.29 mL, 13.8 mmol) dropwise. The reaction mixture was stirred for 90 min. Saturated sodium carbonate solution (21 mL) was then added and stirring was continued for 30 min, before water (35 mL) was added. The aqueous phase was extracted with DCM and the combined organic extracts were washed with brine, dried over anhydrous  $\text{MgSO}_4$  and concentrated *in vacuo*. The crude residue was then dissolved in DMSO (70 mL) at room temperature. Cesium carbonate (6.7 g, 20.7 mmol) was added, and the mixture was stirred for 10 min. 2,4-Difluoronitrobenzene (1.97 mL, 18.0 mmol) was added dropwise, and the reaction was stirred for 24 hours. The mixture was then diluted with water (100 mL) and extracted with ethyl acetate (3 x 100 mL). The organic phases were combined, dried over anhydrous  $\text{MgSO}_4$

and concentrated *in vacuo*, before column chromatography (petrol:ethyl acetate [9:1]) afforded isopropyl isocyanoacetate as a brown oil (808 mg, 22%).

IR (neat)  $\nu_{\max}$  2981, 2152, 1778, 1591, 1541, 1345, 1229, 857  $\text{cm}^{-1}$ .

$^1\text{H}$  NMR (400 MHz,  $\text{CDCl}_3$ )  $\delta$  8.28 (1H, dd,  $J$  9.2, 5.0), 7.59 (1H, dd,  $J$  8.9, 2.8), 7.31 (1H, ddd,  $J$  9.1, 6.9, 2.7), 6.36 (1H, s), 5.09 (1H, sept,  $J$  6.2), 1.31 (3H, d,  $J$  6.2), 1.27 (3H, d,  $J$  6.2).

$^{13}\text{C}$  NMR (101 MHz,  $\text{CDCl}_3$ )  $\delta$  165.4 (d,  $J$  260.4), 163.8, 163.0, 130.5 (d,  $J$  9.1), 128.8 (d,  $J$  9.9), 117.4 (d,  $J$  22.7), 116.7 (d,  $J$  26.3), 72.4, 57.8, 21.4, 21.3.

$^{19}\text{F}$  NMR (377 MHz,  $\text{CDCl}_3$ ,  $\{^1\text{H}\}$ )  $\delta$  -99.5.

$m/z$  HRMS ( $\text{ESI}^+$ ) 289.0598 ( $[\text{M}+\text{Na}]^+$ ,  $\text{C}_{12}\text{H}_{11}\text{FN}_2\text{O}_4\text{Na}$  requires 289.0595).

#### Methyl 2-(4-chloro-2-nitrophenyl)-2-isocyanoacetate

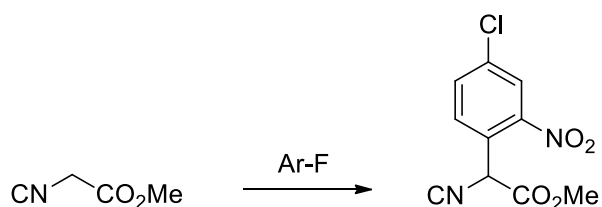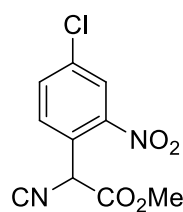

This compound was prepared according to general procedure B, using 5-chloro-2-fluoronitrotoluene (1.53 mL, 13.0 mmol). Column chromatography (petrol:ethyl acetate [9:1]) afforded the title compound as a brown oil (1.78 g, 70%).

IR (neat)  $\nu_{\max}$  2992, 2156, 1612, 1337, 1237, 1219, 827  $\text{cm}^{-1}$ .

$^1\text{H}$  NMR (400 MHz,  $\text{CDCl}_3$ )  $\delta$  8.21 (1H, d,  $J$  2.0), 7.84 (1H, d,  $J$  8.4), 7.79 (1H, dd,  $J$  8.4, 2.1), 6.38 (1H, s), 3.87 (3H, s).



$^{13}\text{C}$  NMR (101 MHz,  $\text{CDCl}_3$ )  $\delta$  164.3, 163.8, 147.3, 136.8, 134.5, 130.4, 126.0, 125.2, 56.8, 54.4.

$m/z$  HRMS ( $\text{ESI}^+$ ) 276.9990 ( $[\text{M}+\text{Na}]^+$ ,  $\text{C}_{10}\text{H}_7\text{ClN}_2\text{O}_4\text{Na}$  requires 276.9987).

#### Methyl 2-(3-fluoro-2-nitrophenyl)-2-isocyanoacetate

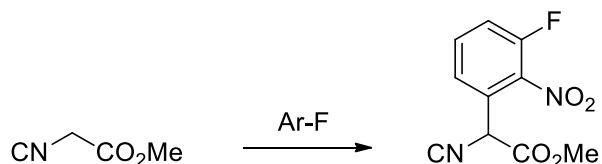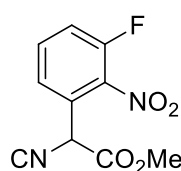

This compound was prepared according to general procedure B, using 2,6-difluoronitrobenzene (2.07 g, 13.0 mmol). Column chromatography (petrol:ethyl acetate [6:1]) afforded the title compound as a brown oil (1.65 g, 69%).

IR (neat)  $\nu_{\text{max}}$  3001, 2146, 1589, 1335, 1256, 1222  $\text{cm}^{-1}$ .

$^1\text{H}$  NMR (400 MHz,  $\text{CDCl}_3$ )  $\delta$  7.70 (1H, td,  $J$  8.2, 5.1), 7.62 (1H, d,  $J$  8.0), 7.43 (1H, ddd,  $J$  9.4, 8.5, 1.2), 6.01 (1H, s), 3.85 (3H, s).

$^{13}\text{C}$  NMR (101 MHz,  $\text{CDCl}_3$ )  $\delta$  164.0, 164.0, 154.9 (d,  $J$  262.2), 141.6, 133.6 (d,  $J$  8.8), 127.0, 123.7 (d,  $J$  3.8), 119.1 (d,  $J$  20.0), 55.6, 54.4.

$^{19}\text{F}$  NMR (377 MHz,  $\text{CDCl}_3$ ,  $\{^1\text{H}\}$ )  $\delta$  -119.0.

$m/z$  HRMS ( $\text{ESI}^+$ ) 261.0290 ( $[\text{M}+\text{Na}]^+$ ,  $\text{C}_{10}\text{H}_7\text{FN}_2\text{O}_4\text{Na}$  requires 261.0282).

#### Methyl 2-isocyano-2-(4-methyl-2-nitrophenyl)acetate

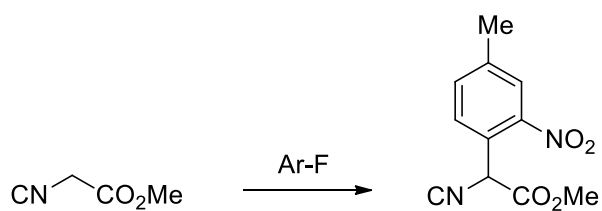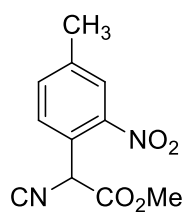

This compound was prepared according to general procedure B, using 4-fluoro-3-nitrotoluene (2.02 g, 13.0 mmol). Column chromatography (petrol:ethyl acetate [9:1]) afforded the title compound as a brown oil (1.46 g, 60%).

IR (neat)  $\nu_{\text{max}}$  2962, 2150, 1527, 1355, 1257, 1231, 989  $\text{cm}^{-1}$ .

$^1\text{H}$  NMR (400 MHz,  $\text{CDCl}_3$ )  $\delta$  8.00 (1H, s), 7.71 (1H, d,  $J = 8.0$ ), 7.60 (1H, dd,  $J = 8.0, 0.8$ ), 6.31 (1H, s), 3.83 (3H, s), 2.51 (3H, s).

$^{13}\text{C}$  NMR (101 MHz,  $\text{CDCl}_3$ )  $\delta$  164.9, 162.8, 146.8, 141.6, 135.2, 129.2, 126.2, 123.9, 57.1, 54.1, 21.0.

$m/z$  HRMS ( $\text{ESI}^+$ ) 257.0535 ( $[\text{M}+\text{Na}]^+$ ,  $\text{C}_{11}\text{H}_{10}\text{N}_2\text{O}_4\text{Na}$  requires 257.0533).

## 2.2 Synthesis of Michael Acceptors

**General Procedure D:** Zinc dust (10 eq) and ammonium chloride (15 eq) were added to a vigorously stirred room temperature solution of the relevant isopropyl acrylate (1.0 eq) in acetone:water [4:1] (5.0 mL/mmol substrate). After 15 min the reaction mixture was decanted from the remaining zinc residue; the residue was washed with ethyl acetate (2 x 5.0 mL/mmol substrate) and the washings were decanted and combined. The combined organic phases were filtered through Celite<sup>®</sup>, washed with water (5.0 mL/mmol substrate), dried over anhydrous MgSO<sub>4</sub>, filtered and concentrated *in vacuo*. The crude residue was then dissolved in chloroform (3.0 mL/mmol substrate); pyridine (1.3 eq) was added, and the solution was cooled to 0 °C and stirred. Ethyl chloroformate (1.2 eq) was added dropwise into the reaction mixture. The mixture was stirred for 3 h and allowed to warm to room temperature. The solution was then washed with brine (2.0 mL/mmol substrate) and water (2 x 2.0 mL/mmol substrate), dried over anhydrous MgSO<sub>4</sub> and concentrated *in vacuo*.

**General Procedure E:** Potassium carbonate (1.0 eq) and diisopropyl malonate (1.0 eq) were dissolved in DMF (1.7 mL/mmol substrate), and stirred for 10 min at 90 °C. After allowing the reaction mixture to cool to room temperature, the relevant 2-fluoronitrobenzene (1.0 eq) was added, and then stirred for 3 h at 90 °C. After cooling to room temperature, the reaction mixture was diluted with 5% aqueous hydrochloric acid solution (2.5 mL/mmol substrate) and extracted with diethyl ether (3 x 5.0 mL/mmol substrate). The organic phases were combined, washed with brine (5.0 mL/mmol substrate) and water (5.0 mL/mmol substrate), dried over anhydrous MgSO<sub>4</sub> and concentrated *in vacuo*. The crude residue was then dissolved in DMSO (1.7 mL/mmol substrate), before sodium chloride (1.0 eq) and water (2.0 eq) were added. The reaction mixture was stirred for 24 h at 130 °C. After cooling to room temperature, the mixture was diluted with water (2.5

mL/mmol substrate) and extracted with ethyl acetate (3 x 5.0 mL/mmol substrate). The organic phases were then combined, washed with brine (5.0 mL/mmol substrate) and water (5.0 mL/mmol substrate), dried over anhydrous  $\text{MgSO}_4$  and concentrated *in vacuo*.

**General Procedure F:** Paraformaldehyde (2.80 eq), tetrabutylammonium bromide (0.04 eq) and potassium carbonate (3.00 eq) were added to a stirred solution of the relevant isopropyl acetate (1.00 eq) in toluene (1.5 mL/mmol substrate), and the solution was heated to 50 °C. After 20 h the solution was allowed to cool to room temperature, water (3.5 mL/mmol substrate) was added and the aqueous layer was extracted with toluene (3 x 2.0 mL/mmol). The combined organic fractions were dried over anhydrous  $\text{MgSO}_4$ , filtered and concentrated *in vacuo*.

#### Isopropyl 2-(2-((ethoxycarbonyl)amino)phenyl)acrylate (1)

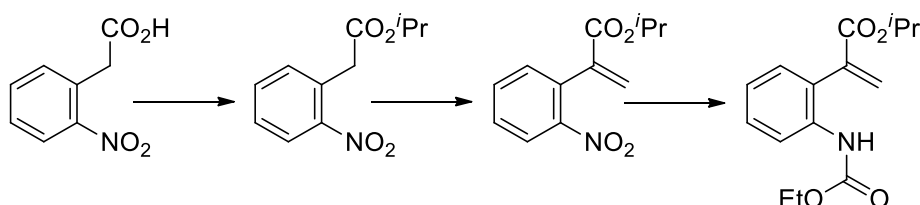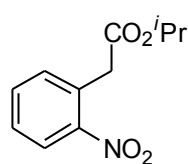

Concentrated sulfuric acid (5.0 mL) was added to a stirred solution of 2-nitrophenylacetic acid (15.0 g, 82.8 mmol) in isopropanol (50 mL) at room temperature. The mixture was then stirred at reflux for 4 h. After allowing to cool to room temperature, EtOAc (200 mL) was added. The mixture was washed with water (100 mL) and then with saturated aqueous sodium bicarbonate solution (2 x 100 mL). The combined organic phases were dried over anhydrous  $\text{MgSO}_4$ , filtered and concentrated *in vacuo* to afford isopropyl 2-(2-nitrophenyl)acetate as an orange oil (17.2 g, 93%), which was used without further purification.

$^1\text{H}$  NMR (400 MHz,  $\text{CDCl}_3$ )  $\delta$  8.07 (1H, d,  $J$  8.1), 7.57 (1H, app. t,  $J$  7.5), 7.49-7.41 (1H, m), 7.33 (1H, d,  $J$  7.5), 5.01 (1H, sept,  $J$  6.2), 3.97 (2H, s), 1.21 (6H, d,  $J$  6.2).

$^{13}\text{C}$  NMR (101 MHz,  $\text{CDCl}_3$ )  $\delta$  169.4, 148.8, 133.5, 133.3, 130.0, 128.5, 125.2, 68.8, 40.1, 21.7.

Data in accordance with literature (P. Strazzolini, A. G. Giumanini, A. Runcio, M. Scuccato, *J. Org. Chem.* **1998**, 63, 952).

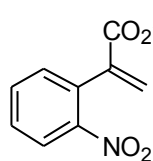

Prepared from isopropyl 2-(2-nitrophenyl)acetate (16.0 g) according to general procedure F to afford isopropyl 2-(2-nitrophenyl)acrylate as an orange oil (15.0 g, 89%), which was used without further purification.

IR (neat)  $\nu_{\text{max}}$  3071, 2983, 2937, 1716, 1526, 1350, 1207  $\text{cm}^{-1}$ .

$^1\text{H}$  NMR (400 MHz,  $\text{CDCl}_3$ )  $\delta$  8.11 (1H, d,  $J$  8.1), 7.65 (1H, app. td,  $J$  7.5, 1.5), 7.58-7.46 (1H, m), 7.39 (1H, dd,  $J$  7.4, 1.5), 6.53 (1H, d,  $J$  1.0), 5.86 (1H, d,  $J$  1.0), 5.05 (1H, sept,  $J$  6.2), 1.21 (6H, d,  $J$  6.2).

$^{13}\text{C}$  NMR (101 MHz,  $\text{CDCl}_3$ )  $\delta$  164.2, 148.0, 140.5, 133.6, 133.2, 132.1, 129.2, 127.1, 124.5, 69.2, 21.5.

HRMS (ESI $^+$ ) 258.0747 ( $[\text{M}+\text{Na}]^+$ ,  $\text{C}_{12}\text{H}_{13}\text{NO}_4\text{Na}$  requires 258.0742).

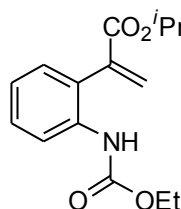

This compound was prepared according to general procedure D, using ethyl chloroformate (2.70 mL, 28.1 mmol). Column chromatography (petrol:ethyl acetate [4:1]) afforded the title compound **1** as an orange wax (3.61 g, 56%).

IR (neat)  $\nu_{\text{max}}$  3343, 2982, 1806, 1714, 1583, 1521, 1451, 1299, 1211, 1105, 1059  $\text{cm}^{-1}$ .

$^1\text{H}$  NMR (400 MHz,  $\text{CDCl}_3$ )  $\delta$  7.88 (1H, app. s), 7.41-7.35 (1H, m), 7.20-7.09 (2H, m), 6.93 (1H, br s, NH), 6.57 (1H, d,  $J$  1.5), 5.85 (1H, d,  $J$  1.5), 5.15 (1H, sept,  $J$  6.2), 4.21 (2H, q,  $J$  7.1), 1.34-1.28 (9H, m).

$^{13}\text{C}$  NMR (101 MHz,  $\text{CDCl}_3$ )  $\delta$  166.2, 153.9, 139.8, 135.4, 130.5, 130.2, 129.2, 126.9, 124.0, 121.9, 69.3, 61.2, 21.7, 14.6.

HRMS ( $\text{ESI}^+$ ) 300.1208 ( $[\text{M}+\text{Na}]^+$ ,  $\text{C}_{15}\text{H}_{19}\text{NO}_4\text{Na}$  requires 300.1212).

m.p. 45-47 °C.

### Isopropyl 2-(((benzyloxy)carbonyl)amino)phenyl)acrylate

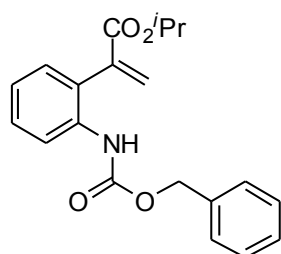

This compound was prepared according to general procedure D, using benzyl chloroformate (1.46 mL, 10.2 mmol). Column chromatography (petrol:ethyl acetate [4:1]) afforded the title compound as an orange solid (1.53 g, 53%).

IR (neat)  $\nu_{\text{max}}$  3340, 2981, 1712, 1584, 1519, 1451, 1298, 1199, 1105, 1042, 937, 817  $\text{cm}^{-1}$ .

$^1\text{H}$  NMR (400 MHz,  $\text{CDCl}_3$ )  $\delta$  7.97-7.84 (1H, m), 7.50-7.30 (6H, m), 7.21-7.11 (2H, m), 7.06 (1H, br s, NH), 6.56 (1H, d,  $J$  1.4), 5.85 (1H, d,  $J$  1.4), 5.21 (2H, s), 5.12 (1H, sept,  $J$  6.3), 1.27 (6H, d,  $J$  6.3).

$^{13}\text{C}$  NMR (101 MHz,  $\text{CDCl}_3$ )  $\delta$  166.2, 153.8, 139.7, 136.2, 135.3, 130.6, 130.3, 129.2, 128.9, 128.6, 128.4, 128.3, 124.1, 122.1, 69.3, 67.0, 21.7.

HRMS ( $\text{ESI}^+$ ) 362.1356 ( $[\text{M}+\text{Na}]^+$ ,  $\text{C}_{20}\text{H}_{21}\text{NO}_4\text{Na}$  requires 362.1368).

m.p. 52-58 °C.

### Isopropyl 2-(4-acetyl-2-((ethoxycarbonyl)amino)phenyl)acrylate

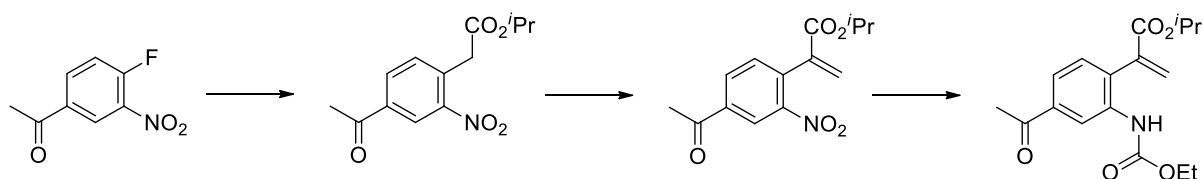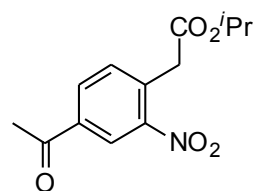

This compound was prepared according to general procedure E, using 4'-fluoro-3'-nitroacetophenone (4.00 g, 21.8 mmol). Column chromatography (petrol:ethyl acetate [5:1]) afforded isopropyl 2-(4-acetyl-2-nitrophenyl)acetate as a yellow solid (3.01 g, 52%).

IR (neat)  $\nu_{max}$  2983, 1729, 1692, 1619, 1534, 1354, 1254, 1219, 1105  $\text{cm}^{-1}$ .

$^1\text{H}$  NMR (400 MHz,  $\text{CDCl}_3$ )  $\delta$  8.64 (1H, d,  $J$  1.7), 8.16 (1H, dd,  $J$  7.9, 1.7), 7.50 (1H, d,  $J$  7.9), 5.04 (1H, sept,  $J$  6.3), 4.06 (2H, s), 2.68 (3H, s), 1.24 (6H, d,  $J$  6.3).

$^{13}\text{C}$  NMR (101 MHz,  $\text{CDCl}_3$ )  $\delta$  195.4, 168.7, 149.0, 137.3, 133.9, 132.4, 132.0, 125.0, 69.3, 40.1, 26.7, 21.7.

HRMS ( $\text{ESI}^+$ ) 288.0853 ( $[\text{M}+\text{Na}]^+$ ,  $\text{C}_{13}\text{H}_{15}\text{NO}_5\text{Na}$  requires 288.0842).

m.p. 47-49  $^\circ\text{C}$ .

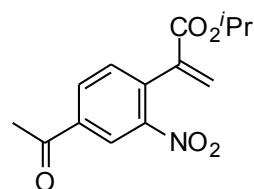

This compound was prepared according to general procedure F, using isopropyl 2-(4-acetyl-2-nitrophenyl)acetate (2.20 g, 8.29 mmol). Column chromatography (petrol:ethyl acetate [3:1]) afforded isopropyl 2-(4-acetyl-2-nitrophenyl)acrylate as a yellow oil (529 mg, 23%).

IR (neat)  $\nu_{max}$  3049, 2916, 1736, 1713, 1619, 1499, 1265  $\text{cm}^{-1}$ .

$^1\text{H}$  NMR (400 MHz,  $\text{CDCl}_3$ )  $\delta$  8.62 (1H, s), 8.20 (1H, d,  $J$  8.0), 7.52 (1H, d,  $J$  8.0), 6.59 (1H, app. s), 5.93 (1H, app. s), 5.04 (1H, sept,  $J$  6.2), 2.68 (3H, s), 1.20 (6H, d,  $J$  6.2).

$^{13}\text{C}$  NMR (101 MHz,  $\text{CDCl}_3$ )  $\delta$  195.4, 163.6, 148.2, 139.8, 137.8, 137.1, 132.7, 132.6, 128.2, 124.3, 69.6, 26.7, 21.5.

HRMS ( $\text{ESI}^+$ ) 300.0846 ( $[\text{M}+\text{Na}]^+$ ,  $\text{C}_{14}\text{H}_{15}\text{NO}_5\text{Na}$  requires 300.0848).

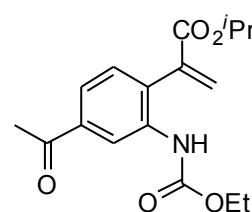

This compound was prepared according to general procedure D, using isopropyl 2-(4-acetyl-2-nitrophenyl)acrylate (500 mg, 1.80 mmol). Column chromatography (petrol:ethyl acetate [3:1]) afforded the title compound as a yellow oil (172 mg, 30%).

IR (neat)  $\nu_{\text{max}}$  3322, 2982, 1716, 1686, 1572, 1525, 1422, 1290, 1211, 1096, 1054  $\text{cm}^{-1}$ .

$^1\text{H}$  NMR (400 MHz,  $\text{CDCl}_3$ )  $\delta$  8.41 (1H, s), 7.63 (1H, dd,  $J$  7.9, 1.7), 7.17 (1H, d,  $J$  7.9), 6.89 (1H, br s, NH), 6.54 (1H, app. s), 5.79 (1H, app. s), 5.06 (1H, sept,  $J$  6.2), 4.14 (2H, q,  $J$  7.1), 2.55 (3H, s), 1.26-1.18 (9H, m).

$^{13}\text{C}$  NMR (101 MHz,  $\text{CDCl}_3$ )  $\delta$  197.6, 165.6, 153.8, 139.1, 137.8, 135.9, 131.3, 130.6, 125.3, 123.3, 122.1, 69.6, 61.5, 26.8, 21.7, 14.5.

HRMS ( $\text{ESI}^+$ ) 342.1310 ( $[\text{M}+\text{Na}]^+$ ,  $\text{C}_{17}\text{H}_{21}\text{NO}_5\text{Na}$  requires 342.1317).

#### Isopropyl 2-(2-((ethoxycarbonyl)amino)-4-(trifluoromethyl)phenyl)acrylate

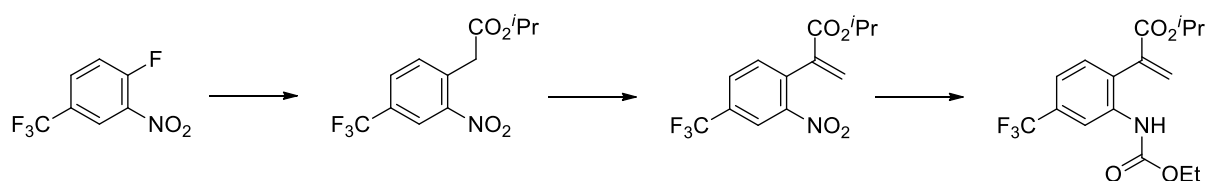



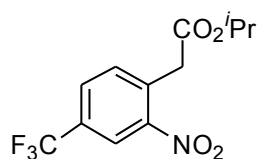

This compound was prepared according to general procedure E, using 2-fluoro-5-(trifluoromethyl)nitrobenzene (1.34 mL, 9.56 mmol). Column chromatography (petrol:ethyl acetate [8:1]) afforded isopropyl 2-(2-nitro-4-(trifluoromethyl)phenyl)acetate as a yellow oil (2.17 g, 78%).

IR (neat)  $\nu_{max}$  3096, 2987, 2851, 1715, 1630, 1575, 1538, 1503  $\text{cm}^{-1}$ .

$^1\text{H}$  NMR (400 MHz,  $\text{CDCl}_3$ )  $\delta$  8.28 (1H, s), 7.77 (1H, d,  $J$  8.0), 7.45 (1H, d,  $J$  8.0), 4.95 (1H, sept,  $J$  6.3), 3.98 (2H, s), 1.16 (6H, d,  $J$  6.3).

$^{13}\text{C}$  NMR (101 MHz,  $\text{CDCl}_3$ )  $\delta$  168.6, 148.9, 134.3, 133.9, 131.2 (q,  $J$  34.3), 129.8 (q,  $J$  3.5), 122.8 (q,  $J$  272.4,  $\text{CF}_3$ ), 122.5 (q,  $J$  3.8), 69.4, 40.0, 21.6.

$^{19}\text{F}$  NMR (377 MHz,  $\{^1\text{H}\}$ ,  $\text{CDCl}_3$ )  $\delta$  -63.0.

HRMS ( $\text{ESI}^+$ ) 314.0619 ( $[\text{M}+\text{Na}]^+$ ,  $\text{C}_{12}\text{H}_{12}\text{F}_3\text{NO}_4\text{Na}$  requires 314.0616).

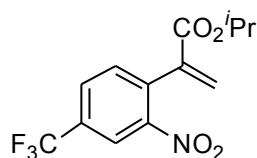

This compound was prepared according to general procedure F, using isopropyl 2-(2-nitro-4-(trifluoromethyl)phenyl)acetate (2.00 g, 6.87 mmol). Isopropyl 2-(2-nitro-4-(trifluoromethyl)phenyl)acrylate was afforded as a brown oil (1.52 g, 73%), which was used without further purification.

IR (neat)  $\nu_{max}$  2940, 1714, 1541, 1352, 1134, 1087, 697  $\text{cm}^{-1}$ .

$^1\text{H}$  NMR (400 MHz,  $\text{CDCl}_3$ )  $\delta$  8.30 (1H, s), 7.83 (1H, app. ddd,  $J$  8.0, 1.8, 0.6), 7.49 (1H, d,  $J$  8.0), 6.54 (1H, d,  $J$  0.6), 5.86 (1H, d,  $J$  0.6), 5.03 (1H, sept,  $J$  6.3), 1.15 (6H, d,  $J$  6.3).

$^{13}\text{C}$  NMR (101 MHz,  $\text{CDCl}_3$ )  $\delta$  163.5, 148.0, 139.5, 136.6, 133.1, 131.8 (q,  $J$  34.3), 130.1 (q,  $J$  3.5), 128.4, 122.7 (q,  $J$  272.5,  $\text{CF}_3$ ), 121.9 (q,  $J$  3.8), 69.7, 21.5.

$^{19}\text{F}$  NMR (377 MHz,  $\{^1\text{H}\}$ ,  $\text{CDCl}_3$ )  $\delta$  -62.9.

HRMS ( $\text{ESI}^+$ ) 326.0600 ( $[\text{M}+\text{Na}]^+$ ,  $\text{C}_{13}\text{H}_{12}\text{F}_3\text{NO}_4\text{Na}$  requires 326.0611).

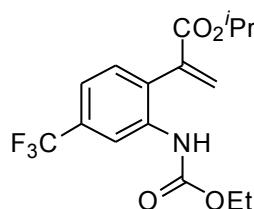

This compound was prepared according to general procedure D, using isopropyl 2-(2-nitro-4-(trifluoromethyl)phenyl)acrylate (1.40 g, 4.62 mmol). Column chromatography (petrol:ethyl acetate [5:1]) afforded the title compound as a yellow oil (431 mg, 27%).

IR (neat)  $\nu_{\text{max}}$  3341, 2985, 1719, 1584, 1534, 1471, 1333, 1214, 1127, 1095  $\text{cm}^{-1}$ .

$^1\text{H}$  NMR (400 MHz,  $\text{CDCl}_3$ )  $\delta$  8.24-8.15 (1H, m), 7.29-7.22 (1H, m), 7.20-7.14 (1H, m), 6.94 (1H, br s, NH), 6.55 (1H, d,  $J$  1.2), 5.79 (1H, d,  $J$  1.2), 5.06 (1H, sept,  $J$  6.3), 4.13 (2H, q,  $J$  7.1), 1.24-1.18 (9H, m).

$^{13}\text{C}$  NMR (101 MHz,  $\text{CDCl}_3$ )  $\delta$  165.5, 153.6, 138.7, 136.2, 131.6, 131.3 (q,  $J$  32.6), 130.7, 127.9, 123.8 (q,  $J$  272.2,  $\text{CF}_3$ ), 120.2 (app. br s), 118.3 (app. br s), 69.7, 61.6 ( $\text{OCH}_2\text{CH}_3$ ), 21.6, 14.5.

$^{19}\text{F}$  NMR (377 MHz,  $\{^1\text{H}\}$ )  $\delta$  -62.8.

HRMS ( $\text{ESI}^+$ ) 368.1086 ( $[\text{M}+\text{Na}]^+$ ,  $\text{C}_{16}\text{H}_{18}\text{F}_3\text{NO}_4\text{Na}$  requires 368.1068).

### Isopropyl 2-(2-benzamidophenyl)acrylate

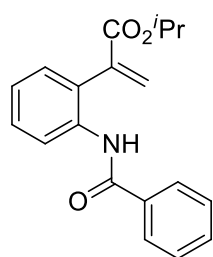

Zinc dust (5.58 g, 85.0 mmol) and ammonium chloride (6.83 g, 128 mmol) were added to a vigorously stirred room temperature solution of isopropyl 2-(2-nitrophenyl)acrylate (2.00 g, 8.50 mmol) in acetone:water [4:1] (50 mL). After 15 min the reaction mixture was decanted from the remaining zinc residue; the residue was washed with ethyl acetate (2 x 50 mL) and the washings were decanted and combined. The combined organic phases were filtered through Celite<sup>®</sup>, washed with water (50 mL), dried over

anhydrous  $\text{MgSO}_4$ , filtered and concentrated *in vacuo*. The crude residue was then dissolved in DCM (30 mL); pyridine (826  $\mu\text{L}$ , 10.2 mmol) was added, and the solution was cooled to 0 °C and stirred. Benzoyl chloride (983  $\mu\text{L}$ , 8.50 mmol) was added dropwise into the reaction mixture. The mixture was stirred for 12 h and allowed to warm to room temperature. The solution was then washed with brine (30 mL) and water (2 x 30 mL/mmol substrate), dried over anhydrous  $\text{MgSO}_4$  and concentrated *in vacuo*. Column chromatography (petrol:ethyl acetate [5:1]) afforded the title compound as a light yellow solid (1.76 g, 67%).

IR (neat)  $\nu_{\text{max}}$  3321, 2982, 1665, 1580, 1518, 1449, 1303, 1199, 1100, 1079  $\text{cm}^{-1}$ .

$^1\text{H}$  NMR (400 MHz,  $\text{CDCl}_3$ )  $\delta$  8.93 (1H, br s, NH), 8.06 (1H, d,  $J$  8.0), 7.90 (2H, d,  $J$  7.6), 7.60-7.42 (4H, m), 7.28-7.18 (2H, m) 6.54 (1H, d,  $J$  1.3), 5.91 (1H, d,  $J$  1.3), 5.16 (1H, sept,  $J$  6.3), 1.30 (6H, d,  $J$  6.3).

$^{13}\text{C}$  NMR (101 MHz,  $\text{CDCl}_3$ )  $\delta$  167.2, 165.4, 140.3, 135.3, 134.8, 131.8, 131.0, 130.6, 129.3, 128.7, 127.4, 127.1, 125.2, 124.3, 69.7, 21.7.

$m/z$  LRMS ( $\text{ESI}^+$ ) 332.1  $[\text{M}+\text{Na}]^+$ ; HRMS ( $\text{ESI}^+$ ) 332.1259 ( $[\text{M}+\text{Na}]^+$ ,  $\text{C}_{19}\text{H}_{19}\text{NO}_3\text{Na}$  requires 332.1263).

m.p. 75-77 °C.

### Isopropyl 2-(2-(3-(*p*-tolyl)ureido)phenyl)acrylate (22)

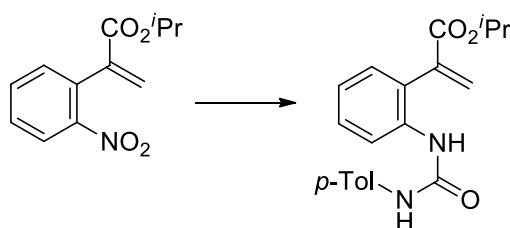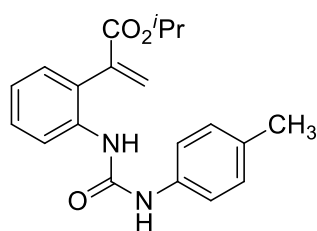

To a solution of isopropyl 2-(2-nitrophenyl)acrylate (4.26 g, 18.1 mmol) in acetone (80 mL) and water (20 mL) was added zinc powder (5.05 g,

77.2 mmol) followed by  $\text{NH}_4\text{Cl}$  (16.7 g, 311 mmol). The reaction was stirred vigorously for 15 minutes before the solution was decanted from the zinc residue. The residue was washed several times with EtOAc and the washings were combined and filtered through Celite. The filtrate was washed with water, dried over  $\text{MgSO}_4$  and evaporated under reduced pressure. The crude residue was dissolved in  $\text{CHCl}_3$  (50 mL) and 1-isocyanato-4-methylbenzene (2.28 mL, 18.1 mmol) was added. The reaction was stirred overnight and the product was filtered to afford the title compound **22** as a white solid (3.44 g, 56 %).

IR (neat)  $\nu_{\text{max}}$  3300, 3024, 1704, 1642, 1549, 1375, 1230, 1209, 1106  $\text{cm}^{-1}$ .

$^1\text{H}$  NMR (400 MHz,  $\text{CDCl}_3$ )  $\delta$  7.72 (1H, d,  $J$  8.1), 7.43-7.39 (1H, m), 7.25-7.16 (4H, m), 7.15-7.08 (2H, m), 6.94 (1H, br s, NH), 6.78 (1H, br s, NH), 6.47 (1H, d,  $J$  1.4), 5.82 (1H, d,  $J$  1.4), 5.01 (1H, sept,  $J$  6.2), 2.32 (3H, s), 1.22 (6H, d,  $J$  6.2).

$^{13}\text{C}$  NMR (101 MHz)  $\delta$  166.5, 153.8, 140.1, 135.7, 135.4, 133.8, 131.9, 130.5, 129.8, 129.7, 129.4, 125.2, 125.0, 121.5, 69.4, 21.6, 20.8.

HRMS ( $\text{ESI}^+$ ) 361.1521 ( $[\text{M}+\text{Na}]^+$ ,  $\text{C}_{20}\text{H}_{22}\text{N}_2\text{O}_3\text{Na}$  requires 361.1528).

m.p. 160-165  $^\circ\text{C}$ .

#### Isopropyl 2-(2-(3-(4-methoxyphenyl)ureido)phenyl)acrylate

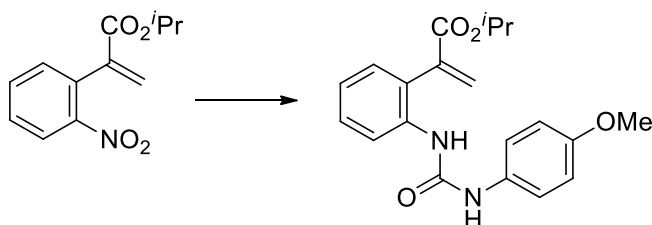

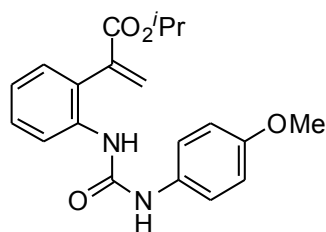

To a solution of isopropyl 2-(2-nitrophenyl)acrylate (2.35 g, 10.0 mmol) in acetone (50 mL) and water (12 mL) was added zinc powder (2.81 g, 43.0 mmol) followed by  $\text{NH}_4\text{Cl}$  (9.06 g, 171.0 mmol). The reaction was stirred vigorously for 15 minutes before the solution was decanted

from the zinc residue. The residue was washed several times with EtOAc and the washings were combined and filtered through Celite. The filtrate was washed with water, dried over  $\text{MgSO}_4$  and evaporated under reduced pressure. The crude residue was dissolved in  $\text{CHCl}_3$  (25 mL) and 1-isocyanato-4-methoxybenzene (1.30 mL, 10.0 mmol) was added. The reaction was stirred overnight before concentrating *in vacuo*. Purification by column chromatography (petrol:ethyl acetate [3:1]) followed by recrystallisation from EtOAc/hexanes afforded the title compound as a colourless oil (1.05 g, 30 %).

IR (neat)  $\nu_{\text{max}}$  3299, 3028, 1710, 1636, 1551, 1370, 1236, 1216, 1101  $\text{cm}^{-1}$ .

$^1\text{H}$  NMR (400 MHz,  $\text{CDCl}_3$ )  $\delta$  7.75 (1H, d,  $J$  8.0), 7.39 (1H, ddd,  $J$  7.9, 7.0, 2.2), 7.14-7.25 (4H, m), 6.94 (1H, br s, NH), 6.85 (2H, d,  $J$  8.9), 6.77 (1H, br s, NH), 6.46 (1H, d,  $J$  1.4), 5.81 (1H, d,  $J$  1.3), 5.00 (1H, sept,  $J$  6.3), 3.81 (3H, s), 1.22 (6H, d,  $J$  6.3).

$^{13}\text{C}$  NMR (101 MHz)  $\delta$  166.5, 154.3, 140.1, 135.8, 133.5, 131.6, 130.7, 130.4, 129.8, 129.3, 125.0, 124.8, 124.0, 114.4, 69.4, 55.5, 21.6.

HRMS ( $\text{ESI}^+$ ) 377.1472 ( $[\text{M}+\text{Na}]^+$ ,  $\text{C}_{20}\text{H}_{22}\text{N}_2\text{O}_4\text{Na}$  requires 377.1475).

### 3. Diastereoselective reaction

**General Procedure G:** The relevant Michael acceptor substrate (1.0 eq), isocyanide (1.0 eq) and tetrabutylammonium bromide (0.1 eq) were dissolved in toluene (10 mL/mmol substrate). The selected base (5.0 eq) was added, and the mixture was stirred at room temperature until both substrates were consumed according to thin layer chromatography (2-24 h). The reaction mixture was then diluted with DCM (20 mL/mmol substrate) and washed with brine (20 mL/mmol substrate) and water (20 mL/mmol substrate). The organic phases were combined, dried over anhydrous  $\text{MgSO}_4$  and concentrated *in vacuo*.

#### 8-Ethyl 3a-isopropyl 2,2-diphenyl-1,3,3a,8a-tetrahydropyrrolo[2,3-*b*]indole-3a,8(2*H*)-dicarboxylate (4)

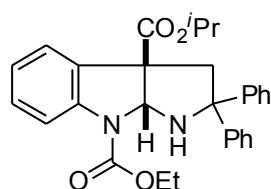

This compound was prepared according to general procedure G, using isopropyl 2-((ethoxycarbonyl)amino)phenylacrylate (60 mg, 0.22 mmol) as the Michael acceptor, (isocyanomethylene)dibenzene (42 mg, 0.22 mmol) as the isocyanide and potassium carbonate (150 mg, 1.1 mmol) as the base. Reaction time was 72 h. Column chromatography (petrol:ethyl acetate [4:1]) afforded the title compound **4** as a yellow oil (63%, >20:1 d.r.).

IR (neat)  $\nu_{\text{max}}$  1717, 1605, 1487, 1375, 1243, 1104, 905  $\text{cm}^{-1}$ .

$^1\text{H}$  NMR (400 MHz,  $\text{CDCl}_3$ )  $\delta$  7.45 (1H, d,  $J$  7.5), 7.33-7.25 (2H, m), 7.24-7.16 (3H, m), 7.11 (1H, app. s), 7.06-6.96 (3H, m), 6.96-6.88 (3H, m), 6.81 (1H, t,  $J$  7.4), 6.08 (1H, s), 4.85 (1H, sept,  $J$  6.2), 4.36-4.19 (2H, m), 3.74 (1H, br s, NH), 3.14 (1H, d,  $J$  13.0), 3.01 (1H, d,  $J$  13.0), 1.39-1.27 (3H, m), 1.09 (6H, app. s).

$^{13}\text{C}$  NMR (101 MHz,  $\text{CDCl}_3$ )  $\delta$  171.3, 152.5, 146.5, 140.7, 129.0, 128.4, 127.6, 126.8, 126.7, 126.3, 126.1, 125.9, 123.8, 123.6, 122.7, 114.7, 80.7, 70.6, 69.3, 62.0, 61.5, 49.7, 21.6, 14.9.

HRMS ( $\text{ESI}^+$ ) 493.2098 ( $[\text{M}+\text{Na}]^+$ ,  $\text{C}_{29}\text{H}_{30}\text{N}_2\text{O}_4\text{Na}$  requires 493.2103).

**8-Ethyl 3a-isopropyl 2,2-di-*p*-tolyl-1,3,3a,8a-tetrahydropyrrolo[2,3-*b*]indole-3a,8(2*H*)-dicarboxylate (5)**

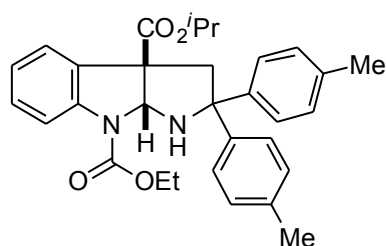

This compound was prepared according to general procedure G, using isopropyl 2-(2-((ethoxycarbonyl)amino)phenyl)acrylate (60 mg, 0.22 mmol) as the Michael acceptor, 4,4'-(isocyanomethylene)bis(methylbenzene) (48 mg, 0.22 mmol) as

the isocyanide and potassium carbonate (150 mg, 1.1 mmol) as the base. Reaction time was 72 h. Column chromatography (petrol:ethyl acetate [6:1]) afforded the title compound **5** as a colourless oil (22%, >20:1 d.r.).

IR (neat)  $\nu_{\text{max}}$  2981, 1719, 1598, 1511, 1486, 1410, 1377, 1239, 1104, 1059, 908  $\text{cm}^{-1}$ .

$^1\text{H}$  NMR (500 MHz,  $\text{CDCl}_3$ )  $\delta$  7.57 (1H, app. s), 7.34-7.22 (2H, m), 7.19-7.06 (4H, m), 7.00 (2H, d,  $J$  8.2), 6.92 (1H, t,  $J$  7.5), 6.84 (2H, d,  $J$  7.4), 6.22-6.07 (1H, s), 4.93 (1H, sept,  $J$  6.2), 4.56-4.18 (2H, m), 3.85 (1H, br s, NH), 3.26 (1H, d,  $J$  13.1), 3.00 (1H, d,  $J$  13.1), 2.31 (3H, s), 2.19 (3H, s), 1.34-1.27 (3H, m), 1.23-1.12 (6H, m).

$^{13}\text{C}$  NMR (126 MHz,  $\text{CDCl}_3$ )  $\delta$  171.3, 152.5, 143.4, 141.7, 140.6, 139.8, 136.4, 135.8, 129.5, 129.3, 129.0, 128.8, 128.3, 123.5, 122.7, 114.7, 80.4, 70.0, 69.2, 62.0, 61.5, 49.8, 21.7, 20.9, 20.8, 14.7.

HRMS ( $\text{ESI}^+$ ) 521.2421 ( $[\text{M}+\text{Na}]^+$ ,  $\text{C}_{31}\text{H}_{34}\text{N}_2\text{O}_4\text{Na}$  requires 521.2416).

**8-Ethyl 3a-isopropyl 2,2-bis(4-chlorophenyl)-1,3,3a,8a-tetrahydropyrrolo[2,3-*b*]indole-3a,8(2*H*)-dicarboxylate (6)**

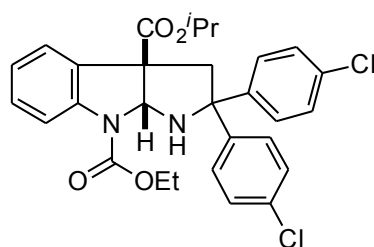

This compound was prepared according to general procedure G, using isopropyl 2-(2-((ethoxycarbonyl)amino)phenyl)acrylate (60 mg, 0.22 mmol) as the Michael acceptor, 4,4'-(isocyanomethylene)bis(chlorobenzene) (57 mg, 0.22 mmol) as the

isocyanide and potassium carbonate (150 mg, 1.1 mmol) as the base. Reaction time was 16 h. Column chromatography (petrol:ethyl acetate [6:1]) afforded the title compound **6** as a colourless oil (76%, >20:1 d.r.) in an inseparable mixture with a small amount of isopropyl 2,2-bis(4-chlorophenyl)-1-(*p*-tolylcarbamoyl)-1,2,3,4-tetrahydroquinoline-4-carboxylate.

IR (neat)  $\nu_{\max}$  1719, 1602, 1488, 1232, 1097, 904, 724  $\text{cm}^{-1}$ .

$^1\text{H}$  NMR (500 MHz,  $\text{CDCl}_3$ )  $\delta$  7.42 (1H, app. s), 7.26-7.11 (6H, m), 7.05-6.95 (2H, m), 6.93-6.78 (3H, m), 6.12-5.99 (1H, m), 4.88 (1H, sept,  $J$  6.2), 4.36-4.10 (2H, m), 3.80 (1H, br s, NH), 2.98 (2H, app. br s), 1.37-1.27 (3H, m), 1.13-1.07 (6H, m).

$^{13}\text{C}$  NMR (126 MHz,  $\text{CDCl}_3$ )  $\delta$  171.1, 152.4, 144.8, 143.5, 141.3, 136.2, 132.9, 132.3, 129.7, 128.5, 127.7, 127.5, 127.3, 123.8, 123.0, 114.7, 81.0, 69.9, 69.5, 62.1, 61.6, 49.7, 21.6, 14.7.

HRMS ( $\text{ESI}^+$ ) 561.1323 ( $[\text{M}+\text{Na}]^+$ ,  $\text{C}_{29}\text{H}_{28}\text{Cl}_2\text{N}_2\text{O}_4\text{Na}$  requires 561.1324).

**8'-Ethyl 3a'-isopropyl 3',3a'-dihydro-1'*H*-spiro[fluorene-9,2'-pyrrolo[2,3-*b*]indole]-3a',8'(8a'*H*)-dicarboxylate (7)**

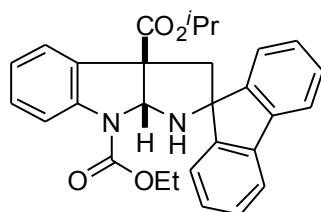

This compound was prepared according to general procedure G, using isopropyl 2-(2-((ethoxycarbonyl)amino)phenyl)acrylate (60 mg, 0.22 mmol) as the Michael acceptor, 9-isocyano-9*H*-fluorene (41 mg, 0.22



mmol) as the isocyanide and potassium carbonate (150 mg, 1.1 mmol) as the base. Reaction time was 16 h. Column chromatography (petrol:ethyl acetate [4:1]) afforded the title compound **7** as a yellow oil (54%, >20:1 d.r.).

IR (neat)  $\nu_{max}$  1716, 1582, 1487, 1330, 1250, 1103, 905  $\text{cm}^{-1}$ .

$^1\text{H}$  NMR (500 MHz,  $\text{CDCl}_3$ )  $\delta$  8.03 (1H, app. s), 7.66 (1H, d,  $J$  7.5), 7.62-7.55 (2H, m), 7.43-7.35 (3H, m), 7.35-7.25 (2H, m), 7.17-7.07 (2H, m), 7.00 (1H, d,  $J$  7.5), 6.62 (1H, s), 5.15 (1H, sept,  $J$  6.3), 4.46-4.19 (2H, m), 3.22 (1H, d,  $J$  13.9), 3.09 (1H, br s, NH), 2.78 (1H, d,  $J$  13.9), 1.34-1.23 (9H, m).

$^{13}\text{C}$  NMR (126 MHz,  $\text{CDCl}_3$ )  $\delta$  171.9, 154.4, 152.8, 151.7, 149.5, 141.2, 139.2, 139.1, 129.6, 128.4, 128.3, 128.2, 128.0, 124.6, 124.2, 124.1, 123.2, 119.9, 119.5, 115.5, 82.2, 72.9, 69.7, 62.0, 61.7, 49.2, 21.6, 14.7.

HRMS ( $\text{ESI}^+$ ) 491.1945 ( $[\text{M}+\text{Na}]^+$ ,  $\text{C}_{29}\text{H}_{28}\text{N}_2\text{O}_4\text{Na}$  requires 491.1947).

The reaction with 9-isocyano-9*H*-fluorene and isopropyl 2-(2-((ethoxycarbonyl)amino)phenyl)acrylate formed 1'-ethyl 4'-isopropyl 3',4'-dihydro-1'*H*-spiro[fluorene-9,2'-quinoline]-1',4'-dicarboxylate as a separable by-product in 34% yield.

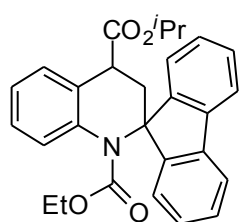

IR (neat)  $\nu_{max}$  2982, 2129, 1729, 1590, 1520, 1452, 1220, 1104, 1062, 907  $\text{cm}^{-1}$ .

$^1\text{H}$  NMR (500 MHz,  $\text{CDCl}_3$ )  $\delta$  7.64-7.57 (3H, m), 7.56 (1H, app. s), 7.42-7.29 (4H, m), 7.20 (1H, t,  $J$  7.6), 7.08 (1H, td,  $J$  7.7, 1.4), 6.83 (1H, t,  $J$  7.4), 6.70 (1H, app. s), 4.52 (1H, sept,  $J$  6.2), 4.14 (2H, q,  $J$  7.1), 3.49 (1H, dd,  $J$  13.9, 8.3), 2.98-2.89 (1H, m), 2.67 (1H, dd,  $J$  13.9, 3.4), 1.27 (3H, t,  $J$  7.1), 0.87 (3H, d,  $J$  6.2), 0.85 (3H, d,  $J$  6.2).

$^{13}\text{C}$  NMR (126 MHz,  $\text{CDCl}_3$ )  $\delta$  172.4, 154.1, 157.1, 142.5, 141.9, 140.1, 139.7, 135.7, 130.2, 130.1, 129.0, 128.8, 128.6, 128.5, 128.2, 124.7, 123.8, 123.6, 120.5, 120.4, 69.6, 67.0 (C-9), 61.3, 43.6, 42.1, 21.5, 21.2, 14.7.

HRMS ( $\text{ESI}^+$ ) 442.2013 ( $[\text{M}+\text{H}]^+$ ,  $\text{C}_{28}\text{H}_{28}\text{NO}_4$  requires 442.2018).

**8-Benzyl 3a-isopropyl 2-methyl 2-isobutyl-1,2,3,3a-tetrahydropyrrolo[2,3-*b*]indole-2,3a,8(8a*H*)-tricarboxylate (**11**)**

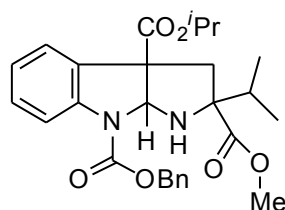

This compound was prepared according to general procedure G, using isopropyl 2-(2-(((benzyloxy)carbonyl)amino)phenyl)acrylate (50 mg, 0.15 mmol) as the Michael acceptor, methyl 2-isocyano-3-methylbutanoate (21 mg, 0.15 mmol) as the isocyanide and 25% aqueous potassium hydroxide solution (0.5 mL) as the base. Reaction time was 2 h. Column chromatography (petrol:ethyl acetate [4:1]) afforded the pyrroloindoline **11** as a colourless oil (75%, 1:1 d.r.).

IR (neat)  $\nu_{\text{max}}$  2978, 1721, 1485, 1394, 1244, 1104, 752, 698  $\text{cm}^{-1}$ .

NMR Data are provided for mixture of diastereomers.

$^1\text{H}$  NMR (500 MHz, toluene- $d_8$ , 363 K)  $\delta$  8.08-7.83 (2H, m), 7.35-7.23 (6H, m), 7.19-6.98 (8H, m), 6.93-6.79 (2H, m), 6.32 (1H, s), 6.26 (1H, s), 5.35-5.23 (2H, m), 5.12-5.01 (2H, m), 4.97-4.85 (2H, m), 3.64 (1H, br s, NH), 3.45 (3H, s), 3.36 (1H, d,  $J$  13.3), 2.99 (3H, s), 2.90 (1H, d,  $J$  12.9), 2.59 (1H, d,  $J$  12.9), 2.13-2.09 (1H, m), 1.88-1.74 (2H, m), 1.03-0.95 (12H, m), 0.83 (6H, dd,  $J$  16.1, 6.9), 0.74 (6H, dd,  $J$  14.9, 6.9).

$^{13}\text{C}$  NMR (126 MHz, toluene- $d_8$ )  $\delta$  175.7, 174.7, 171.3, 171.1, 153.9, 152.1, 142.9, 141.8, 137.2, 137.0, 132.5, 132.0, 131.1, 129.5, 129.2, 128.5, 127.6, 125.4, 124.3, 123.9, 123.2, 123.1, 115.7, 114.8, 82.0,

81.1, 73.0, 72.5, 69.2, 69.1, 67.0, 66.8, 61.2, 61.1, 51.7, 51.3, 44.9, 44.2, 37.2, 35.4, 21.4, 21.3, 18.0, 18.0.

HRMS (ESI<sup>+</sup>) 503.2131 ([M+Na]<sup>+</sup>, C<sub>27</sub>H<sub>32</sub>N<sub>2</sub>O<sub>6</sub>Na requires 503.2153).

**8-Ethyl 2-methyl 2-benzyl-3a-cyano-1,3,3a,8a-tetrahydropyrrolo[2,3-*b*]indole-2,8(2*H*)-dicarboxylate (**12**)**

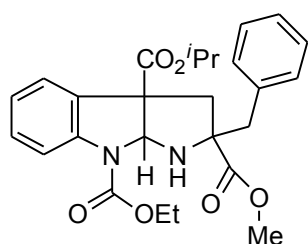

This compound was prepared according to general procedure G, using ethyl (2-(1-cyanovinyl)phenyl)carbamate (39 mg, 0.18 mmol) as the Michael acceptor, methyl 2-isocyano-3-phenylpropanoate (34 mg, 0.18 mmol) as the isocyanide and 25% aqueous potassium hydroxide solution

(0.5 mL) as the base. Reaction time was 2 h. Column chromatography (petrol:ethyl acetate [5:1]) afforded the title compound **12** as a colourless oil (72%, 1:1 d.r.).

IR (neat)  $\nu_{max}$  2274, 2120, 1729, 1570, 1488, 1387, 1331, 1050, 840, 821, 754 cm<sup>-1</sup>.

<sup>1</sup>H NMR (500 MHz, toluene-d<sub>8</sub>, 363 K)  $\delta$  7.98 (2H, app. s, Ar<sub>DS1,DS2</sub>), 7.27 (2H, app. s, Ar<sub>DS1,DS2</sub>), 7.14 (1H, app. s, Ar<sub>DS1</sub>), 6.90 (2H, d, *J* 7.2, Ar<sub>DS1</sub>), 6.81 (1H, t, *J* 7.5, Ar<sub>DS2</sub>), 6.71 (1H, t, *J* 7.4, Ar<sub>DS1</sub>), <sup>†</sup>, 5.91 (1H, s, DS<sub>2</sub>), 5.67 (1H, s, DS<sub>1</sub>), 4.20-3.94 (2H, m, DS<sub>1</sub>), 3.92-3.74 (2H, m, DS<sub>2</sub>), 3.49 (2H, br s, NH<sub>DS1,DS2</sub>), 3.42 (3H, s, DS<sub>2</sub>), 2.98-2.89 (2H, m), 2.85-2.71 (5H, m), 2.67 (1H, d, *J* 12.9), 2.43 (1H, d, *J* 12.9), 2.13 (1H, d, *J* 13.0), 1.90 (1H, d, *J* 13.1), 1.10-0.93 (6H, m, DS<sub>1,DS2</sub>).

<sup>†</sup>Remaining aromatic signals are buried under toluene peaks.

<sup>13</sup>C NMR (126 MHz, toluene-d<sub>8</sub>, 363 K)  $\delta$  174.3, 174.0, 151.5, 137.3, 137.2, 136.5, 136.1, 129.7, 129.7, 129.2, 128.5, 128.5, 128.2, 127.4, 125.4, 124.1, 123.6, 123.5, 115.8, 114.9 [aromatics\*\*], 120.6, 120.4, 82.8, 82.2, 70.8, 69.8, 62.2, 61.5, 52.1, 51.5, 48.7, 48.6, 48.3, 47.5, 46.0, 44.6, 14.5, 14.4.

\*\*Remaining aromatic signals are buried under toluene peaks.

HRMS (ESI<sup>+</sup>) 428.1582 ([M+Na]<sup>+</sup>, C<sub>23</sub>H<sub>23</sub>N<sub>3</sub>O<sub>4</sub>Na requires 428.1586).

**8-Ethyl 3a-isopropyl 2-methyl 2-(5-fluoro-2-nitrophenyl)-1,3,3a,8a-tetrahydropyrrolo[2,3-*b*]indole-2,3a,8(2*H*)-tricarboxylate (**13**)**

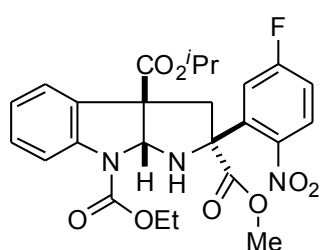

This compound was prepared according to general procedure G, using isopropyl 2-(2-((ethoxycarbonyl)amino)phenyl)acrylate (100 mg, 0.36 mmol) as the Michael acceptor, methyl 2-(5-fluoro-2-nitrophenyl)-2-isocynoacetate (86 mg, 0.36 mmol) as the isocyanide and potassium carbonate (250 mg, 1.8 mmol) as the base. Reaction time was 24 h. Column chromatography (petrol:ethyl acetate [4:1]) afforded the title compound **13** as a yellow oil (57%, >20:1 d.r.).

IR (neat)  $\nu_{max}$  2972, 2212, 1729, 1533, 1487, 1387, 1257, 1104, 1046, 840, 821 cm<sup>-1</sup>.

<sup>1</sup>H NMR (500 MHz, toluene-d<sub>8</sub>, 363 K)  $\delta$  7.85 (1H, app. s), 7.68 (1H, d, *J* 9.0), 7.31 (1H, d, *J* 7.2), 7.29-7.20 (1H, m), 7.16-7.07 (1H, m), 6.87 (1H, t, *J* 7.5), 6.45-6.38 (1H, m), 6.33 (1H, s), 4.87 (1H, sept, *J* 6.3), 4.22-4.04 (2H, m), 3.99 (1H, br s), 3.55 (1H, d, *J* 13.9), 3.13 (3H, s), 3.09 (1H, d, *J* 13.9), 1.12 (3H, t, *J* 7.1), 0.97 (3H, d, *J* 6.3), 0.91 (3H, d, *J* 6.3).

<sup>13</sup>C NMR (126 MHz, toluene-d<sub>8</sub>, 363 K)  $\delta$  171.6, 170.2, 164.0 (d, *J* 254.3), 152.5, 145.0, 141.8, 140.9, 131.3 (d, *J* 9.3), 129.4, 127.0 (d, *J* 9.5), 123.5, 122.8, 115.5 (d, *J* 26.0), 114.6 (d, *J* 24.0), 114.6, 82.4, 71.1, 69.1, 61.3, 60.9, 51.7, 48.3, 20.5, 14.0.

<sup>19</sup>F NMR (377 MHz, toluene-d<sub>8</sub>, {<sup>1</sup>H})  $\delta$  -104.7.

HRMS (ESI<sup>+</sup>) 538.1591 ([M+Na]<sup>+</sup>, C<sub>25</sub>H<sub>26</sub>FN<sub>3</sub>O<sub>8</sub>Na requires 538.1602).

**8-Ethyl 3a-isopropyl 2-methyl 2-(5-methyl-2-nitrophenyl)-1,3,3a,8a-tetrahydropyrrolo[2,3-b]indole-2,3a,8(2H)-tricarboxylate (14)**

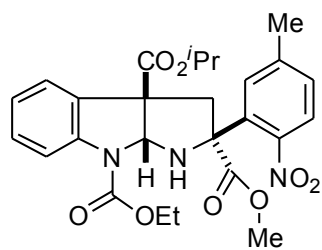

This compound was prepared according to general procedure G, using isopropyl 2-(2-((ethoxycarbonyl)amino)phenyl)acrylate (50 mg, 0.18 mmol) as the Michael acceptor, methyl 2-isocyano-2-(5-methyl-2-nitrophenyl)acetate (42 mg, 0.18 mmol) as the isocyanide and potassium carbonate (120 mg, 0.87 mmol) as the base. Reaction time was 18 h. Column chromatography (petrol:ethyl acetate [7:2]) afforded the title compound **14** as a yellow oil (70%, >20:1 d.r.).

IR (neat)  $\nu_{max}$  2982, 1722, 1523, 1486, 1346, 1239, 1103, 830, 754  $\text{cm}^{-1}$ .

$^1\text{H}$  NMR (500 MHz, toluene- $d_8$ , 363 K)  $\delta$  7.88 (1H, app. s), 7.66 (1H, app. s), 7.35 (1H, d,  $J$  7.5), 7.31-7.24 (1H, m), 7.14-7.11 (1H, m), 6.87 (1H, t,  $J$  7.4), 6.64 (1H, d,  $J$  8.2), 6.40 (1H, s), 4.87 (1H, sept,  $J$  6.2), 4.24-4.03 (3H, m,  $\text{OCH}_2\text{CH}_3$ , NH), 3.61 (1H, d,  $J$  13.7), 3.21-3.13 (4H, m), 1.98 (3H, s), 1.15 (3H, t,  $J$  7.1), 0.99-0.89 (6H, m).

$^{13}\text{C}$  NMR (126 MHz, toluene- $d_8$ , 363 K)  $\delta$  172.8, 170.3, 152.5, 147.3, 142.2, 142.0, 139.1, 136.5, 131.4, 129.4, 126.8, 123.6, 122.8, 122.5, 114.6, 82.2, 71.2, 68.9, 61.3, 60.9, 51.6, 48.4, 20.7, 20.5, 14.0.

HRMS (ESI $^+$ ) 534.1855 ( $[\text{M}+\text{Na}]^+$ ,  $\text{C}_{26}\text{H}_{29}\text{N}_3\text{O}_8\text{Na}$  requires 534.1852).

**8-Ethyl 3a-isopropyl 2-methyl 6-acetyl-2-(5-fluoro-2-nitrophenyl)-1,3,3a,8a-tetrahydropyrrolo[2,3-b]indole-2,3a,8(2H)-tricarboxylate (15)**

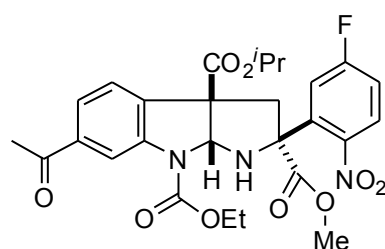

This compound was prepared according to general procedure G, using isopropyl 2-(4-acetyl-2-((ethoxycarbonyl)amino)phenyl)acrylate (60 mg, 0.19 mmol) as

the Michael acceptor, methyl 2-(5-fluoro-2-nitrophenyl)-2-isocyanoacetate (44 mg, 0.19 mmol) as the isocyanide and potassium carbonate (130 mg, 0.94 mmol) as the base. Reaction time was 16 h. Column chromatography (petrol:ethyl acetate [4:1]) afforded the title compound **15** as a yellow oil (61%, >20:1 d.r.).

IR (neat)  $\nu_{max}$  1731, 1668, 1539, 1437, 1255, 1094, 909  $\text{cm}^{-1}$ .

$^1\text{H}$  NMR (500 MHz, toluene- $d_8$ , 363 K)  $\delta$  8.40 (1H, app. s), 7.70 (1H, d,  $J$  10.0), 7.53 (1H, d,  $J$  7.6), 7.34-7.27 (2H, m), 6.49-6.41 (1H, m), 6.34 (1H, s), 4.89 (1H, sept,  $J$  6.2), 4.21-4.04 (2H, m), 3.99 (1H, br s, NH), 3.55 (1H, d,  $J$  14.0), 3.13 (3H, s), 3.09 (1H, d,  $J$  14.0), 2.26 (3H, s), 1.14 (3H, t,  $J$  7.1), 1.00 (3H, d,  $J$  6.2), 0.94 (3H, d,  $J$  6.2).

$^{13}\text{C}$  NMR (126 MHz, toluene- $d_8$ , 363 K)  $\delta$  195.0, 171.4, 169.7, 164.1 (d,  $J$  254.1), 152.6, 144.9, 142.1, 140.8, 135.7, 131.1, 127.1 (d,  $J$  9.4), 123.4, 123.2, 115.4 (d,  $J$  26.2), 114.8 (d,  $J$  23.7), 114.3, 82.8, 71.0, 69.5, 61.7, 60.8, 51.7, 48.2, 25.5, 20.8, 20.7, 13.9.

$^{19}\text{F}$  NMR (377 MHz, toluene- $d_8$ ,  $\{^1\text{H}\}$ )  $\delta$  -104.3.

HRMS (ESI $^+$ ) 558.1876 ( $[\text{M}+\text{H}]^+$ ,  $\text{C}_{27}\text{H}_{29}\text{FN}_3\text{O}_9$  requires 558.1888).

**8-Ethyl 3a-isopropyl 2-methyl 2-(2-nitrophenyl)-1,3,3a,8a-tetrahydropyrrolo[2,3-*b*]indole-2,3a,8(2*H*)-tricarboxylate (16)**

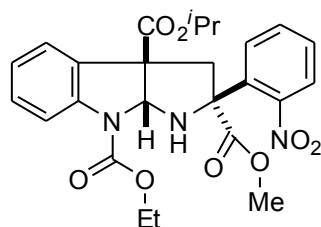

This compound was prepared according to general procedure G, using isopropyl 2-(2-((ethoxycarbonyl)amino)phenyl)acrylate (50 mg, 0.18 mmol) as the Michael acceptor, methyl 2-isocyano-2-(2-nitrophenyl)acetate (40 mg, 0.18 mmol) as the isocyanide and

potassium carbonate (120 mg, 0.87 mmol) as the base. Reaction time was 24 h. Column chromatography (petrol:ethyl acetate [4:1]) afforded the title compound **16** as a yellow oil (41%, 9:2 d.r. DS1:DS2).

IR (neat)  $\nu_{max}$  1730, 1570, 1533, 1487, 1387, 1245, 1044, 840, 821, 753  $\text{cm}^{-1}$ .

$^1\text{H}$  NMR (500 MHz, toluene- $d_8$ , 363K)  $\delta$  7.87 (1H, app. s,  $\text{Ar}_{\text{DS1}}$ ), 7.69 (1H, d,  $J$  8.0,  $\text{Ar}_{\text{DS1}}$ ), 7.56 (1H, d,  $J$  7.8,  $\text{Ar}_{\text{DS2}}$ ), 7.40 (1H, d,  $J$  8.0,  $\text{Ar}_{\text{DS2}}$ ), 7.33 (1H, d,  $J$  7.6,  $\text{Ar}_{\text{DS1}}$ ), 7.27-7.19 (2H, m,  $\text{Ar}_{\text{DS1,DS2}}$ ), 6.87 (1H, t,  $J$  7.5,  $\text{Ar}_{\text{DS1}}$ ), 6.84-6.75 (3H, m,  $\text{Ar}_{\text{DS1,DS2,DS2}}$ ), 6.71 (1H, t,  $J$  7.7,  $\text{Ar}_{\text{DS2}}$ ), 6.45 (1H, s,  $\text{DS2}$ ), 6.35 (1H, s,  $\text{DS1}$ ), 4.99 (1H, sept,  $J$  6.3,  $\text{DS2}$ ), 4.87 (1H, sept,  $J$  6.2,  $\text{DS1}$ ), 4.25-4.02 (5H, m,  $\text{DS1,DS2}$ ,  $\text{NH}_{\text{DS1}}$ ), 3.97 (1H, d,  $J$  13.7,  $\text{DS2}$ ), 3.78 (1H, br s,  $\text{NH}_{\text{DS2}}$ ), 3.55 (1H, d,  $J$  13.7,  $\text{DS1}$ ), 3.40 (3H, s,  $\text{DS2}$ ), 3.16-3.12 (4H, m,  $\text{DS1, DS1}$ ), 2.53 (1H, d,  $J$  13.7,  $\text{DS2}$ ), 1.18-1.12 (6H, m,  $\text{DS1,DS2}$ ), 0.98 (6H,  $J$  6.3,  $\text{DS1,DS2}$ ), 0.92 (6H,  $J$  6.3,  $\text{DS1,DS2}$ ). Remaining aromatic signals are buried under toluene peaks.

$^{13}\text{C}$  NMR (126 MHz, toluene- $d_8$ , 363K)  $\delta$  172.3, 172.1, 170.2, 170.2, 152.5, 149.4, 148.9, 142.0, 142.0, 137.3, 136.6, 136.2, 131.2, 131.1, 129.0, 128.9, 128.3, 127.9, 124.2, 123.6, 123.2, 122.8, 122.5, 115.2, 114.6 [aromatics\*], 82.1, 81.1, 71.1, 70.5, 69.0, 68.9, 61.1, 61.1, 60.9, 60.8, 51.7, 51.6, 48.4, 47.2 (C-8), 21.0, 20.9, 20.9, 20.8, 14.0, 14.0. \*Remaining aromatic signals are buried under toluene peaks.

HRMS (ESI $^+$ ) 520.1687 ( $[\text{M}+\text{Na}]^+$ ,  $\text{C}_{25}\text{H}_{27}\text{N}_3\text{O}_8\text{Na}$  requires 520.1696).

**8-Benzyl 3a-isopropyl 2-methyl 2-(2-methoxyphenyl)-1,3,3a,8a-tetrahydropyrrolo[2,3-*b*]indole-2,3a,8(2*H*)-tricarboxylate (**17**)**

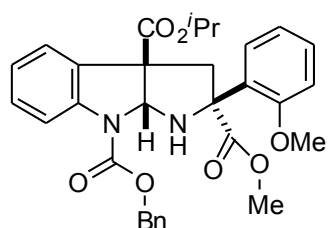

This compound was prepared according to general procedure G, using isopropyl 2-(2-(((benzyloxy)carbonyl)amino)phenyl)acrylate (70 mg, 0.21 mmol) as the Michael acceptor, methyl 2-isocyano-2-(2-

methoxyphenyl)acetate (43 mg, 0.21 mmol) as the isocyanide and potassium carbonate (140 mg, 1.0 mmol) as the base. Reaction time was 24 h. Column chromatography (petrol:ethyl acetate [4:1]) afforded the title compound **17** as a colourless oil (49%, >20:1 d.r.).

IR (neat)  $\nu_{max}$  1728, 1602, 1480, 1352, 1247, 1105, 906  $\text{cm}^{-1}$ .

$^1\text{H}$  NMR (500 MHz, toluene- $d_8$ , 363 K)  $\delta$  7.96 (1H, app. s), 7.59 (1H, d,  $J$  7.6), 7.42 (1H, d,  $J$  7.5), 7.32 (2H, d,  $J$  7.4), 7.20-6.98 (5H, m), 6.87 (1H, t,  $J$  7.5), 6.80 (1H, t,  $J$  7.5), 6.59-6.47 (2H, m), 5.36-5.22 (1H, m), 5.20-5.07 (1H, m), 4.86 (1H, sept,  $J$  6.2), 4.41 (1H, br s, NH), 3.61 (1H, d,  $J$  13.1), 3.31 (3H, s), 3.04 (3H, s), 2.99 (1H, d,  $J$  13.1), 0.96 (3H, d,  $J$  6.2), 0.90 (3H, d,  $J$  6.2).

$^{13}\text{C}$  NMR (126 MHz, toluene- $d_8$ , 363 K)  $\delta$  173.6, 170.7, 157.2, 152.5, 144.2, 142.3, 136.7, 131.9, 128.7, 128.4, 128.2, 127.9, 127.7, 126.7, 123.7, 122.6, 120.8, 114.7, 111.7, 81.9, 69.8, 68.6, 67.0, 60.9, 54.9, 51.0, 46.8, 20.9.

HRMS (ESI $^+$ ) 567.2104 ( $[\text{M}+\text{Na}]^+$ ,  $\text{C}_{31}\text{H}_{32}\text{N}_2\text{O}_7\text{Na}$  requires 567.2107).

**8-Ethyl 3a-isopropyl 2-methyl 2-(5-fluoro-2-nitrophenyl)-6-(trifluoromethyl)-1,3,3a,8a-tetrahydropyrrolo[2,3-*b*]indole-2,3a,8(2*H*)-tricarboxylate (**18**)**

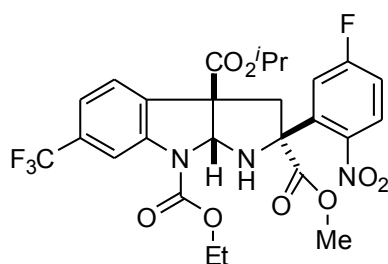

This compound was prepared according to general procedure G, using isopropyl 2-(2-((ethoxycarbonyl)amino)-4-(trifluoromethyl)phenyl)acrylate (60 mg, 0.17 mmol) as the Michael acceptor, methyl 2-(5-fluoro-2-nitrophenyl)-2-

isocyanoacetate (41 mg, 0.17 mmol) as the isocyanide and potassium carbonate (120 mg, 0.87 mmol) as the base. Reaction time was 16 h. Column chromatography (petrol:ethyl acetate [4:1]) afforded the title compound **18** as a yellow oil (48%, >20:1 d.r.).

IR (neat)  $\nu_{max}$  1730, 1532, 1450, 1324, 1258, 1169, 1130, 1065, 909  $\text{cm}^{-1}$ .



$^1\text{H}$  NMR (500 MHz, toluene- $d_8$ , 363 K)  $\delta$  8.16 (1H, app. s), 7.72-7.62 (1H, m), 7.32-7.23 (2H, m), 7.16 (1H, d,  $J$  7.9), 6.46-6.39 (1H, m), 6.31 (1H, s), 4.87 (1H, sept,  $J$  6.3), 4.15-3.99 (2H, m), 3.95 (1H, br s, NH), 3.51 (1H, d,  $J$  14.0), 3.11 (3H, s), 3.03 (1H, d,  $J$  14.0), 1.09 (3H, t,  $J$  7.1), 0.98 (3H, d,  $J$  6.3), 0.92 (3H, d,  $J$  6.3).

$^{13}\text{C}$  NMR (126 MHz, toluene- $d_8$ , 363 K)  $\delta$  171.4, 169.6, 164.1, 152.3, 144.8, 142.2, 140.7, 131.7 (q,  $J$  32.3), 131.3 (app. br s), 127.1 (d,  $J$  9.3), 124.1, 119.8 (q,  $J$  4.0), 115.3 (d,  $J$  26.7), 114.8 (d,  $J$  23.4), 111.4 (q,  $J$  3.9), 124.4 (q,  $J$  271.5,  $\text{CF}_3$ ), 82.8, 71.0, 69.6, 61.9, 60.6, 51.7, 48.3, 20.8, 20.7, 13.8.

$^{19}\text{F}$  NMR (377 MHz, toluene- $d_8$ ,  $\{^1\text{H}\}$ )  $\delta$  -62.4, -102.5.

HRMS (ESI $^+$ ) 584.1670 ( $[\text{M}+\text{H}]^+$ ,  $\text{C}_{26}\text{H}_{26}\text{F}_4\text{N}_3\text{O}_8$  requires 584.1656).

**3a-Isopropyl 2-methyl 8-benzoyl-2-(5-fluoro-2-nitrophenyl)-1,2,3,3a,8,8a-hexahydropyrrolo[2,3-*b*]indole-2,3a-dicarboxylate (**19**)**

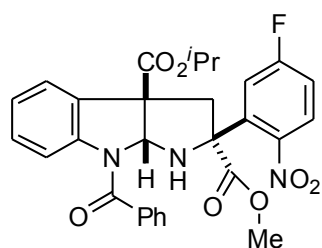

This compound was prepared according to general procedure G, using isopropyl 2-(2-benzamidophenyl)acrylate (70 mg, 0.23 mmol) as the Michael acceptor, methyl 2-(5-fluoro-2-nitrophenyl)-2-isocyanoacetate (54 mg, 0.23 mmol) as the isocyanide and potassium carbonate (160

mg, 1.1 mmol) as the base. Reaction time was 16 h. Column chromatography (petrol:ethyl acetate [4:1]) afforded the title compound **19** as a yellow oil (57%, >20:1 d.r.).

IR (neat)  $\nu_{\text{max}}$  1728, 1635, 1587, 1528, 1480, 1350, 1244, 1135, 1100, 909  $\text{cm}^{-1}$ .

$^1\text{H}$  NMR (400 MHz,  $\text{CDCl}_3$ )  $\delta$  8.09-7.77 (2H, m), 7.59 (2H, app. d,  $J$  7.1), 7.55-7.38 (4H, m), 7.23 (1H, d,  $J$  7.1), 7.10-7.01 (1H, m), 7.00-6.82 (2H, m), 6.28 (1H, br s), 4.90 (1H, sept,  $J$  6.3), 3.86 (1H, br s, NH), 3.52 (1H, d,  $J$  14.4), 3.36 (3H, s), 2.90 (1H, d,  $J$  14.4), 1.13 (3H, d,  $J$  6.3), 1.02 (3H, d,  $J$  6.3).

$^{13}\text{C}$  NMR (101 MHz,  $\text{CDCl}_3$ )  $\delta$  171.6, 170.4, 169.6, 164.2 (d,  $J$  253.5), 143.7, 142.6, 140.9, 136.0, 132.0, 131.1, 128.9, 128.7, 128.1, 127.6, 127.4, 124.1, 123.9, 116.0 (d,  $J$  26.2), 115.4 (d,  $J$  23.1), 84.1, 71.0, 69.8, 60.1, 53.0, 47.5, 21.5.

$^{19}\text{F}$  NMR (377 MHz,  $\text{CDCl}_3$ ,  $\{^1\text{H}\}$ )  $\delta$  -101.6.

HRMS ( $\text{ESI}^+$ ) 570.1646 ( $[\text{M}+\text{Na}]^+$ ,  $\text{C}_{29}\text{H}_{26}\text{FN}_3\text{O}_7\text{Na}$  requires 570.1652).

**8-Ethyl 3a-isopropyl 2-methyl 2-(2-(trifluoromethyl)phenyl)-1,3,3a,8a-tetrahydropyrrolo[2,3-b]indole-2,3a,8(2H)-tricarboxylate (20)**

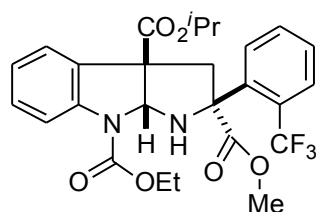

This compound was prepared according to general procedure G, using isopropyl 2-(2-((ethoxycarbonyl)amino)phenyl)acrylate (60 mg, 0.22 mmol) as the Michael acceptor, methyl 2-isocyano-2-(2-(trifluoromethyl)phenyl)acetate (53 mg, 0.22 mmol) as the isocyanide and potassium carbonate (150 mg, 1.1 mmol) as the base. Reaction time was 18 h. Column chromatography (petrol:ethyl acetate [4:1]) afforded the title compound **20** as a colourless oil (65%, >20:1 d.r.).

IR (neat)  $\nu_{\text{max}}$  1731, 1564, 1487, 1311, 1244, 1105, 909  $\text{cm}^{-1}$ .

$^1\text{H}$  NMR (500 MHz, toluene- $d_8$ , 363 K)  $\delta$  8.00-7.78 (2H, m), 7.51 (1H, d,  $J$  7.7), 7.36 (1H, d,  $J$  7.5), 7.16-7.06 (2H, m), 6.95 (1H, t,  $J$  7.4), 6.88 (1H, t,  $J$  7.4), 6.45 (1H, s), 4.85 (1H, sept,  $J$  6.2), 4.25-4.05 (3H, m,  $\text{OCH}_2\text{CH}_3$ , NH), 3.59 (1H, d,  $J$  13.6), 3.14 (3H, s), 3.07 (1H, d,  $J$  13.6), 1.14 (3H, t,  $J$  7.1), 0.96 (3H, d,  $J$  6.2), 0.88 (3H, d,  $J$  6.2).

$^{13}\text{C}$  NMR (126 MHz, toluene- $d_8$ , 363K)  $\delta$  172.8, 170.3, 152.6, 142.0, 141.5, 131.7, 131.4, 129.1, 128.8, 127.5, 127.3, 123.5, 122.7, 114.6 [aromatics\*], 124.6 (q,  $J$  273.3,  $\text{CF}_3$ ), 82.1, 71.7, 68.8, 61.2, 60.9, 51.5, 48.5, 20.8, 20.7, 14.0. \*Remaining aromatic signal is buried under toluene peaks.

$^{19}\text{F}$  NMR (377 MHz,  $\text{CDCl}_3$ ,  $\{^1\text{H}\}$ )  $\delta$  -55.6.

HRMS (ESI<sup>+</sup>) 521.1877 ([M+H]<sup>+</sup>, C<sub>26</sub>H<sub>28</sub>F<sub>3</sub>N<sub>2</sub>O<sub>6</sub> requires 521.1899).

**3a-Isopropyl 2-methyl 2-(5-fluoro-2-nitrophenyl)-8-(*p*-tolylcarbamoyl)-1,2,3,3a,8,8a-hexahydropyrrolo[2,3-*b*]indole-2,3a-dicarboxylate (21)**

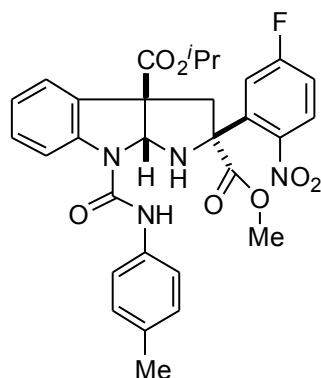

This compound was prepared according to general procedure G, using isopropyl 2-(2-(3-(*p*-tolyl)ureido)phenyl)acrylate (60 mg, 0.18 mmol) as the Michael acceptor, methyl 2-(5-fluoro-2-nitrophenyl)-2-isocynoacetate (42 mg, 0.18 mmol) as the isocyanide and potassium carbonate (120 mg, 0.87 mmol) as the base. Reaction time was 2 h. Column chromatography (petrol:ethyl acetate [9:2]) afforded the title

compound **21** as a colourless oil (54%, >20:1 d.r.).

IR (neat)  $\nu_{max}$  2280, 1618, 1539, 1329, 1243, 812 cm<sup>-1</sup>.

<sup>1</sup>H NMR (400 MHz, CDCl<sub>3</sub>)  $\delta$  7.75 (1H, dd, *J* 8.2, 5.1), 7.62 (1H, d, *J* 8.1), 7.49 (1H, dd, *J* 9.8, 2.7), 7.32 (2H, d, *J* 8.3), 7.28-7.20 (2H, m), 7.13-7.03 (4H, m), 6.96 (1H, t, *J* 7.5), 5.68 (1H, s), 4.88 (1H, sept, *J* 6.3), 3.50 (3H, s), 3.42 (1H, br s, NH), 3.37 (1H, d, *J* 14.2), 2.83 (1H, d, *J* 14.2), 2.25 (3H, s), 1.11 (6H, d, *J* 6.3).

<sup>13</sup>C NMR (101 MHz)  $\delta$  171.2, 170.3, 164.0 (d, *J* 256.3), 152.2, 145.2, 141.6, 137.9, 135.3, 133.4, 130.8 (d, *J* 9.3), 129.8, 129.5, 127.6 (d, *J* 9.5), 124.3, 123.2, 120.3, 116.6 (d, *J* 25.9), 116.0 (d, *J* 23.4), 114.6, 82.1, 70.7, 70.2, 62.3, 53.4, 47.8, 21.5, 20.8.

<sup>19</sup>F NMR (377 MHz, {<sup>1</sup>H})  $\delta$  -103.4.

HRMS (ESI<sup>+</sup>) 599.1910 ([M+Na]<sup>+</sup>, C<sub>30</sub>H<sub>29</sub>FN<sub>4</sub>O<sub>7</sub>Na requires 599.1918).

#### 4. Enantioselective reaction

**General Procedure H:** The relevant Michael acceptor substrate (1.0 eq), isocyanide (1.1 eq) and catalyst **29** (0.1 eq) were dissolved in toluene/CHCl<sub>3</sub>/H<sub>2</sub>O (14:5:1 v/v, 10 mL/mmol substrate) at -20 °C. After 10 minutes, K<sub>2</sub>CO<sub>3</sub> (5.0 eq) was added, and the mixture was stirred at -20 °C until both substrates were consumed according to thin layer chromatography (24-48 h). The reaction mixture was then loaded directly onto a silica gel column and purified by flash chromatography.

**Catalyst synthesis:** Catalysts **24-31** were synthesized from the appropriate cinchona alkaloid according to the procedure by Chen and co-workers (S. Wu, D. Pan, C. Cao, Q. Wang, F.-X. Chen, *Adv. Synth. Catal.* **2013**, 355, 1917-1923).

**Optimization reactions:** To a vial containing isopropyl 2-(2-(3-(p-tolyl)ureido)phenyl)acrylate (20 mg) in solvent (2 mL) was added methyl 2-(5-fluoro-2-nitrophenyl)-2-isocyanoacetate (1.1 eq.), the appropriate catalyst (10 mol %) and finally the base. The reaction was stirred at the appropriate temperature for 24 h before an aliquot was removed and purified by preparative TLC. The sample was analyzed by chiral stationary phase HPLC to determine the e.r. (see Section 6).

**3a-Isopropyl      2-methyl      2-(5-fluoro-2-nitrophenyl)-8-(*p*-tolylcarbamoyl)-1,2,3,3a,8,8a-hexahydropyrrolo[2,3-*b*]indole-2,3a-dicarboxylate (21)**

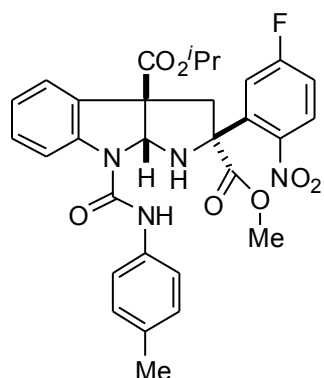

This compound was prepared according to general procedure H, using isopropyl 2-(2-(3-(*p*-tolyl)ureido)phenyl)acrylate (50 mg) as the Michael acceptor and methyl 2-(5-fluoro-2-nitrophenyl)-2-isocyanoacetate as the isocyanide. Column chromatography (petrol:ethyl acetate [9:2]) afforded the title compound **21** as a colourless oil (60%, >20:1 d.r., 90:10 e.r.).

Data matched with those from the diastereoselective reaction.

**2-Benzyl      3a-isopropyl      2-(5-fluoro-2-nitrophenyl)-8-(*p*-tolylcarbamoyl)-1,2,3,3a,8,8a-hexahydropyrrolo[2,3-*b*]indole-2,3a-dicarboxylate (32)**

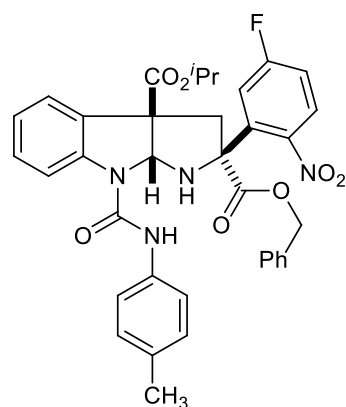

This compound was prepared according to general procedure H, using isopropyl 2-(2-(3-(*p*-tolyl)ureido)phenyl)acrylate (50 mg) as the Michael acceptor and benzyl 2-(5-fluoro-2-nitrophenyl)-2-isocyanoacetate as the isocyanide. The reaction was performed at 0 °C. Column chromatography (petrol:ethyl acetate [17:3]) afforded the title compound **32** as a colourless oil (54%, >20:1 d.r., 90:10 e.r.).

IR (neat)  $\nu_{max}$  3401, 3270, 2981, 1733, 1593, 1530, 1479, 1345, 1238, 1103  $\text{cm}^{-1}$ .

$^1\text{H}$  NMR (400 MHz,  $\text{CDCl}_3$ )  $\delta$  7.86 (1H, dd,  $J$  8.9, 5.1), 7.63 (1H, d,  $J$  7.7), 7.60 (1H, dd,  $J$  9.0, 2.6), 7.41 (2H, d,  $J$  8.4), 7.37-7.31 (2H, m), 7.31-7.29 (1H, m), 7.28-7.26 (1H, m), 7.23-7.11 (6H, m), 7.04 (1H, td,  $J$  7.6, 0.8), 5.83 (1H, d,  $J$  5.7), 5.06-4.98 (2H, m), 4.98 (1H, sept,  $J$  6.3), 3.53 (1H, d,  $J$  5.8), 3.44 (1H, d,  $J$  14.3), 3.00 (1H, d,  $J$  14.2), 2.36 (3H, s), 1.21 (3H, d,  $J$  6.2), 1.19 (3H, d,  $J$  6.1).

$^{13}\text{C}$  NMR (101 MHz,  $\text{CDCl}_3$ )  $\delta$  170.6, 170.3, 164.0 (d,  $J$  254.8), 152.1, 145.1, 141.5, 138.2, 135.4, 134.7, 133.3, 130.8, 129.8, 129.5, 128.5, 128.5, 128.2, 127.6 (d,  $J$  9.5), 124.3, 123.1, 120.1, 116.6 (d,  $J$  26.0), 116.0 (d,  $J$  23.3), 114.3, 82.3, 70.9, 70.2, 68.2, 62.2, 47.8, 21.5, 21.5, 20.9.

$^{19}\text{F}$  NMR (377 MHz,  $\text{CDCl}_3$ )  $\delta$  -103.3 (ddd,  $J$  9.8, 6.7, 4.9).

$m/z$  HRMS ( $\text{ESI}^+$ ) 675.2222 ( $[\text{M}+\text{Na}]^+$ ,  $\text{C}_{36}\text{H}_{33}\text{FN}_4\text{O}_7\text{Na}$  requires 675.2225).

**3a-Isopropyl 2-methyl 2-(2-nitrophenyl)-8-(*p*-tolylcarbamoyl)-1,2,3,3a,8,8a-hexahydropyrrolo[2,3-*b*]indole-2,3a-dicarboxylate (**33**)**

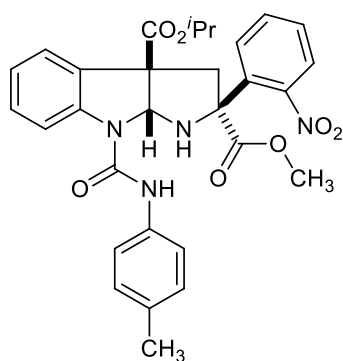

This compound was prepared according to general procedure H, using isopropyl 2-(2-(3-(*p*-tolyl)ureido)phenyl)acrylate (50 mg) as the Michael acceptor and methyl 2-isocyano-2-(2-nitrophenyl)acetate as the isocyanide. Column chromatography (petrol:ethyl acetate [4:1]) afforded the title compound **33** as a colourless oil (46%, 8.9:1 d.r., 93:7 e.r.).

Data are provided for major DS only.

IR (neat)  $\nu_{\text{max}}$  3404, 3279, 1727, 1532, 1479, 1372, 1238, 1101  $\text{cm}^{-1}$ .

$^1\text{H}$  NMR (400 MHz,  $\text{CDCl}_3$ )  $\delta$  7.84 (1H, d,  $J$  8.1), 7.73 (1H, dd,  $J$  7.9, 1.1), 7.68 (1H, dd,  $J$  7.8, 1.3), 7.57 (1H, td,  $J$  7.6, 1.3), 7.51-7.45 (3H, m), 7.43 (1H, br s), 7.36-7.28 (2H, m), 7.17 (2H, d,  $J$  8.3), 7.03 (1H, td,  $J$  7.5, 0.9), 5.58 (1H, s), 4.90 (1H, sept,  $J$  6.2), 3.69 (1H, d,  $J$  14.0), 3.63 (3H, s), 2.75 (1H, d,  $J$  14.1), 2.34 (3H, s), 1.16 (3H, d,  $J$  6.2), 1.12 (3H, d,  $J$  6.3).

$^{13}\text{C}$  NMR (101 MHz,  $\text{CDCl}_3$ )  $\delta$  171.5, 170.3, 152.1, 149.7, 141.9, 135.5, 133.2, 131.8, 130.5, 129.9, 129.5, 129.5, 129.4, 129.2, 124.8, 124.2, 123.2, 120.3, 115.4, 81.7, 70.6, 70.0, 62.9, 53.4, 47.8, 21.5, 21.5, 20.9.

$m/z$  HRMS (ESI<sup>+</sup>) 581.2018 ([M+Na]<sup>+</sup>, C<sub>30</sub>H<sub>30</sub>N<sub>4</sub>O<sub>7</sub>Na requires 581.2007).

**Diisopropyl 2-(5-fluoro-2-nitrophenyl)-8-(*p*-tolylcarbamoyl)-1,2,3,3a,8,8a-hexahydropyrrolo[2,3-*b*]indole-2,3a-dicarboxylate (**34**)**

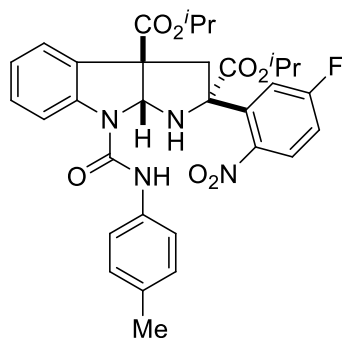

This compound was prepared according to general procedure H, using isopropyl 2-(2-(3-(*p*-tolyl)ureido)phenyl)acrylate (50 mg) as the Michael acceptor and isopropyl 2-(5-fluoro-2-nitrophenyl)-2-isocyanoacetate as the isocyanide. Column chromatography (petrol:ethyl acetate [17:3]) afforded the title compound **34** as a

colourless oil (49%, >20:1 d.r., 92:8 e.r.).

On a 1.00 g scale (of isopropyl 2-(2-(3-(*p*-tolyl)ureido)phenyl)acrylate) this reaction afforded the title compound **34** in a 76 % yield, >20:1 d.r., 92:8 e.r..

IR (neat)  $\nu_{max}$  2280, 1618, 1539, 1329, 1243, 812 cm<sup>-1</sup>.

<sup>1</sup>H NMR (400 MHz, CDCl<sub>3</sub>)  $\delta$  7.81 (1H, dd, *J* 8.8, 5.1), 7.72 (1H, d, *J* 8.1), 7.56 (1H, dd, *J* 9.8, 2.7), 7.42 (2H, d, *J* 8.4), 7.37-7.28 (3H, m), 7.22-7.11 (4H, m), 7.04 (1H, td, *J* 7.5, 0.8), 5.76 (1H, d, *J* 6.0), 4.97 (1H, sept, *J* 6.2), 4.90 (1H, sept, *J* 6.2), 3.43 (1H, d, *J* 6.1), 3.43 (1H, d, *J* 14.2), 2.92 (1H, d, *J* 14.2), 2.34 (3H, s), 1.21 (3H, d, *J* 6.3), 1.18 (3H, d, *J* 6.2), 1.10 (3H, d, *J* 6.3), 1.05 (3H, d, *J* 6.2).

<sup>13</sup>C NMR (101 MHz, CDCl<sub>3</sub>)  $\delta$  170.4, 170.0, 163.9 (d, *J* 255.4), 152.1, 145.2 (d, *J* 4.4), 141.7, 135.4, 133.2, 130.7, 129.8, 129.5, 128.5 (d, *J* 9.2), 127.4 (d, *J* 9.3), 124.3, 124.3, 123.1, 120.2, 116.6 (d, *J* 25.8), 115.8 (d, *J* 23.1), 114.6, 82.3, 71.0, 70.7, 70.2, 62.4, 47.9, 21.5, 21.5, 21.3, 21.2, 20.8.

<sup>19</sup>F NMR (377 MHz, CDCl<sub>3</sub>)  $\delta$  -103.5 (m).

$m/z$  HRMS (ESI<sup>+</sup>) 627.2228 ([M+Na]<sup>+</sup>, C<sub>32</sub>H<sub>33</sub>FN<sub>4</sub>NaO<sub>7</sub> requires 627.2225).

**3a-Isopropyl 2-methyl 2-(4-chloro-2-nitrophenyl)-8-(*p*-tolylcarbamoyl)-1,2,3,3a,8,8a-hexahydropyrrolo[2,3-*b*]indole-2,3a-dicarboxylate (35)**

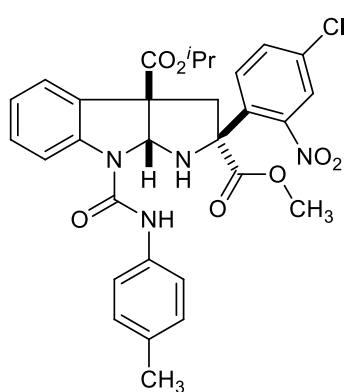

This compound was prepared according to general procedure H, using isopropyl 2-(2-(3-(*p*-tolyl)ureido)phenyl)acrylate (50 mg) as the Michael acceptor and methyl 2-(4-chloro-2-nitrophenyl)2-isocynoacetate as the isocyanide. The reaction was performed at 0 °C. Column chromatography (petrol:ethyl acetate [4:1]) afforded the title compound **35** as a colourless oil (45%, >20:1 d.r., 86:14 e.r.).

IR (neat)  $\nu_{max}$  3401, 3269, 1728, 1531, 1485, 1364, 1240, 1105  $\text{cm}^{-1}$ .

$^1\text{H}$  NMR (400 MHz,  $\text{CDCl}_3$ )  $\delta$  7.78 (1H, d,  $J$  7.9), 7.72 (1H, d,  $J$  8.5), 7.69 (1H, d,  $J$  2.2), 7.54 (1H, dd,  $J$  8.5, 2.2), 7.44 (2H, d,  $J$  8.4), 7.34-7.28 (3H, m), 7.17 (2H, d,  $J$  8.2), 7.04 (1H, td,  $J$  7.5, 0.8), 5.64 (1H, s), 4.93 (1H, sept,  $J$  6.2), 3.60 (3H, s), 3.57 (1H, d,  $J$  14.0), 2.81 (1H, d,  $J$  14.0), 2.34 (3H, s), 1.17 (3H, d,  $J$  6.2), 1.15 (3H, d,  $J$  6.2).

$^{13}\text{C}$  NMR (101 MHz,  $\text{CDCl}_3$ )  $\delta$  171.2, 170.2, 152.0, 149.8, 141.8, 135.4, 135.2, 133.3, 131.9, 131.7, 130.5, 130.4, 129.9, 129.5, 124.9, 124.2, 123.2, 120.3, 115.1, 81.9, 70.4, 70.1, 62.7, 53.5, 47.7, 21.5, 21.5, 20.9.

$m/z$  HRMS ( $\text{ESI}^+$ ) 615.1610 ( $[\text{M}+\text{Na}]^+$ ,  $\text{C}_{30}\text{H}_{29}\text{ClN}_4\text{O}_7\text{Na}$  requires 615.1617).



**3a-Isopropyl 2-methyl 2-(3-fluoro-2-nitrophenyl)-8-(*p*-tolylcarbamoyl)-1,2,3,3a,8,8a-hexahydropyrrolo[2,3-*b*]indole-2,3a-dicarboxylate (36)**

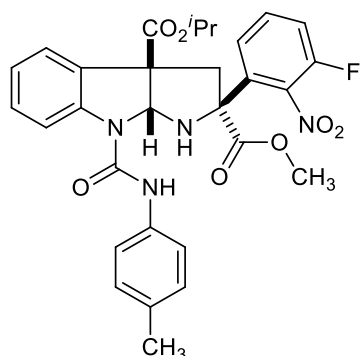

This compound was prepared according to general procedure H, using isopropyl 2-(2-(3-(*p*-tolyl)ureido)phenyl)acrylate (50 mg mmol) as the Michael acceptor and methyl 2-(3-fluoro-2-nitrophenyl)-2-isocyanoacetate as the isocyanide. The reaction was performed at 0 °C. Column chromatography (petrol:ethyl acetate [4:1]) afforded the title compound **36** as a colourless oil (49%, 8.1:1 d.r., 67:37 e.r.).

Data are provided for major DS only.

IR (neat)  $\nu_{max}$  3403, 3279, 2972, 1728, 1678, 1594, 1543, 1480, 1368, 1237, 1101  $\text{cm}^{-1}$ .

$^1\text{H}$  NMR (400 MHz,  $\text{CDCl}_3$ )  $\delta$  7.89 (1H, d,  $J$  8.0), 7.52 (2H, d,  $J$  8.5), 7.47 (1H, dd,  $J$  8.2, 5.3), 7.43-7.37 (2H, m), 7.34-7.30 (1H, m), 7.30 (1H, td,  $J$  7.8, 1.3), 7.27 (1H, td,  $J$  8.3, 1.2), 7.18 (2H, d,  $J$  8.3), 7.03 (1H, t,  $J$  7.5), 5.62 (1H, s), 4.94 (1H, sept,  $J$  6.2), 3.64 (1H, d,  $J$  13.7), 3.60 (3H, s), 3.33 (1H, br s), 2.76 (1H, d,  $J$  13.8), 2.34 (3H, s), 1.20 (3H, d,  $J$  6.2), 1.14 (3H, d,  $J$  6.2).

$^{13}\text{C}$  NMR (101 MHz,  $\text{CDCl}_3$ )  $\delta$  171.0, 170.2, 154.4 (d,  $J$  258.6), 152.0, 142.1, 135.5, 133.2, 132.9, 131.2 (d,  $J$  8.1), 130.0, 129.8, 129.5, 129.4, 124.4 (d,  $J$  3.2), 124.2, 123.2, 120.5, 117.5 (d,  $J$  19.5), 115.6, 81.5, 70.7, 70.1, 63.0, 53.6, 48.1, 21.5, 21.5, 20.9.

$^{19}\text{F}$  NMR (377 MHz,  $\text{CDCl}_3$ )  $\delta$  -122.9 (m).

$m/z$  HRMS ( $\text{ESI}^+$ ) 599.1926 ( $[\text{M}+\text{Na}]^+$ ,  $\text{C}_{30}\text{H}_{29}\text{FN}_4\text{O}_7\text{Na}$  requires 599.1912).

**3a-Isopropyl 2-methyl 2-(4-methyl-2-nitrophenyl)-8-(*p*-tolylcarbamoyl)-1,2,3,3a,8,8a-hexahydropyrrolo[2,3-*b*]indole-2,3a-dicarboxylate (37)**

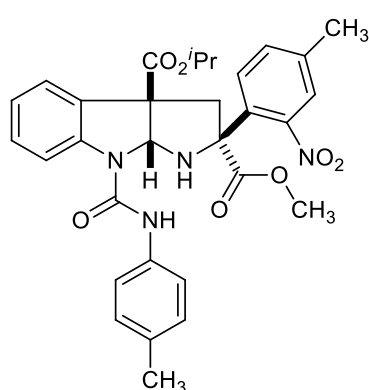

This compound was prepared according to general procedure H, using isopropyl 2-(2-(3-(*p*-tolyl)ureido)phenyl)acrylate (50 mg) as the Michael acceptor and methyl 2-isocyano-2-(4-methyl-2-nitrophenyl)acetate as the isocyanide. Column chromatography (petrol:ethyl acetate [4:1]) afforded the title compound **37** as a colourless oil (83%, 10:1 d.r., 93:7 e.r.).

IR (neat)  $\nu_{max}$  3399, 3267, 1728, 1535, 1479, 1372, 1238, 1102  $\text{cm}^{-1}$ .

$^1\text{H}$  NMR (400 MHz,  $\text{CDCl}_3$ )  $\delta$  7.86 (1H, d,  $J$  8.1), 7.56 (1H, d,  $J$  8.1), 7.51-7.44 (4H, m), 7.38-7.27 (3H, m), 7.17 (2H, d,  $J$  8.3), 7.02 (1H, td,  $J$  7.5, 0.9), 5.55 (1H, s), 4.91 (1H, sept,  $J$  6.2), 3.68 (1H, d,  $J$  13.9), 3.63 (3H, s), 2.70 (1H, d,  $J$  14.0), 2.42 (3H, s), 2.34 (3H, s), 1.18 (3H, d,  $J$  6.2), 1.13 (3H, d,  $J$  6.3).

$^{13}\text{C}$  NMR (101 MHz,  $\text{CDCl}_3$ )  $\delta$  171.7, 170.3, 152.1, 149.6, 141.9, 140.3, 135.6, 133.1, 132.3, 130.4, 129.8, 129.4, 129.4, 129.0, 125.2, 124.2, 123.2, 120.3, 115.5, 81.7, 70.4, 69.9, 63.0, 53.4, 47.8, 21.5, 21.5, 20.9, 20.8.

$m/z$  HRMS ( $\text{ESI}^+$ ) 595.2174 ( $[\text{M}+\text{Na}]^+$ ,  $\text{C}_{31}\text{H}_{32}\text{N}_4\text{O}_7\text{Na}$  requires 595.2163).

**3a-isopropyl 2-methyl 2-(5-fluoro-2-nitrophenyl)-8-((4-methoxyphenyl)carbamoyl)-1,2,3,3a,8,8a-hexahydropyrrolo[2,3-*b*]indole-2,3a-dicarboxylate (38)**

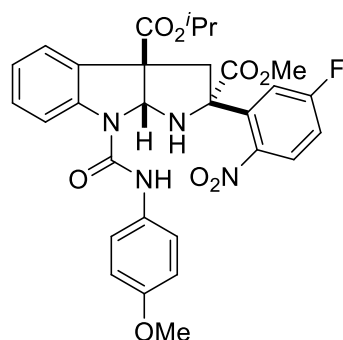

This compound was prepared according to general procedure H, using isopropyl 2-(2-(3-(4-methoxyphenyl)ureido)phenyl)acrylate (50 mg) as the Michael acceptor and methyl 2-(5-fluoro-2-nitrophenyl)-2-isocyanoacetate as the isocyanide. Column chromatography

(petrol:ethyl acetate [4:1]) afforded the title compound **38** as a colourless oil (74%, >20:1 d.r., 90:10 e.r.).

IR (neat)  $\nu_{\max}$  3402, 3282, 1727, 1677, 1514, 1479, 1372, 1232, 1101  $\text{cm}^{-1}$ .

$^1\text{H}$  NMR (400 MHz,  $\text{CDCl}_3$ )  $\delta$  7.82 (1H, dd,  $J$  8.8, 5.0), 7.73 (1H, d,  $J$  8.1), 7.56 (1H, dd,  $J$  9.8, 2.7), 7.45 (2H, d,  $J$  9.0), 7.34 (1H, d,  $J$  7.4), 7.32 (1H, ddd,  $J$  7.9, 7.7, 1.2), 7.20 (1H, s, NH), 7.16 (1H, ddd,  $J$  8.8, 6.9, 2.7), 7.04 (1H, td,  $J$  7.5, 0.8), 6.91 (2H, d,  $J$  9.0), 5.73 (1H, s), 4.96 (1H, sept,  $J$  6.2), 3.82 (3H, s), 3.60 (3H, s), 3.48 (1H, d,  $J$  14.2), 2.88 (1H, d,  $J$  14.2), 1.20 (3H, d,  $J$  6.3), 1.18 (3H, d,  $J$  6.2).

$^{13}\text{C}$  NMR (101 MHz,  $\text{CDCl}_3$ )  $\delta$  171.1, 170.3, 163.9 (d,  $J$  254.9), 155.2, 152.3, 145.2 (d,  $J$  2.9), 141.7, 131.0, 130.7, 129.8, 128.5 (d,  $J$  9.8), 127.5 (d,  $J$  10.0), 124.3, 123.2, 122.1, 116.6 (d,  $J$  25.7), 116.0 (d,  $J$  23.4), 114.7, 114.2, 82.0, 70.6, 70.2, 62.4, 55.5, 53.4, 47.8, 21.5, 21.5.

$^{19}\text{F}$  NMR (377 MHz,  $\text{CDCl}_3$ )  $\delta$  -103.5 (m).

$m/z$  HRMS (ESI $^+$ ) 615.1855 ( $[\text{M}+\text{Na}]^+$ ,  $\text{C}_{30}\text{H}_{29}\text{FN}_4\text{NaO}_8$  requires 615.1862).

## 5. NMR Spectra of Novel Compounds

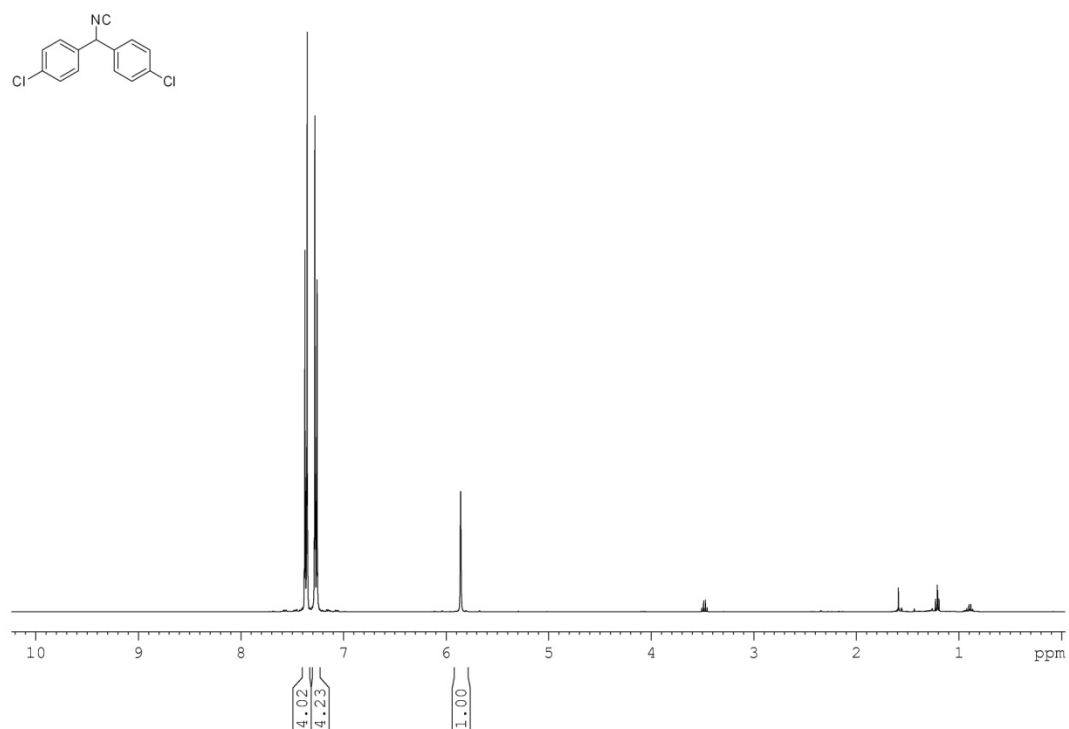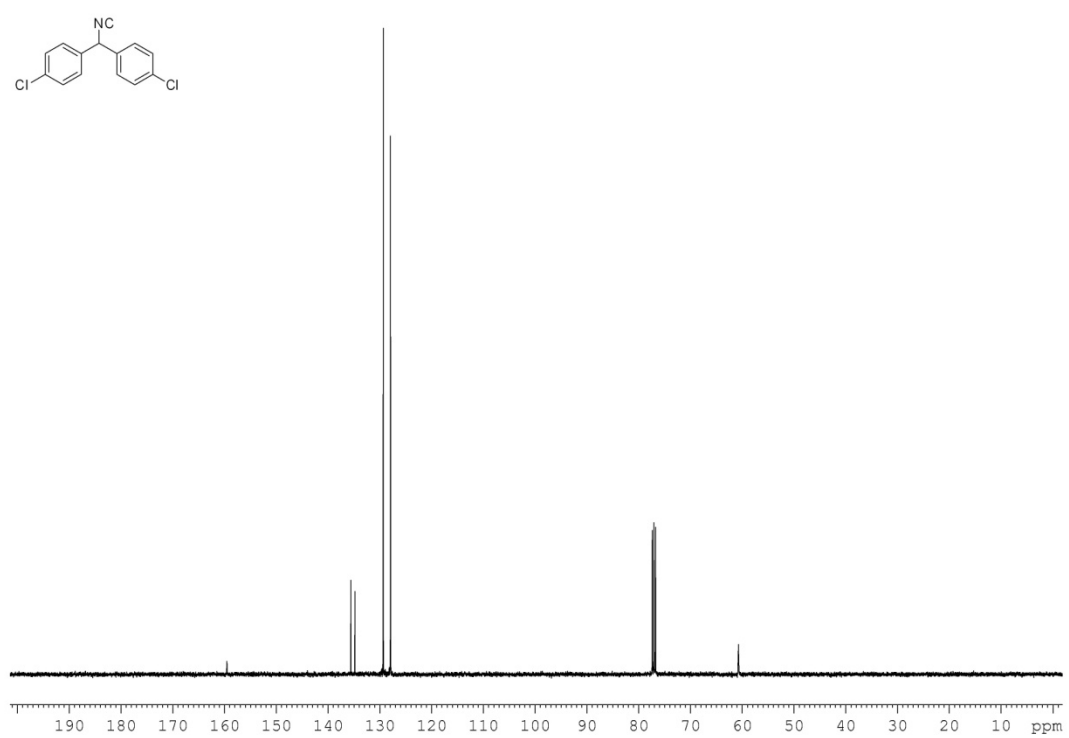

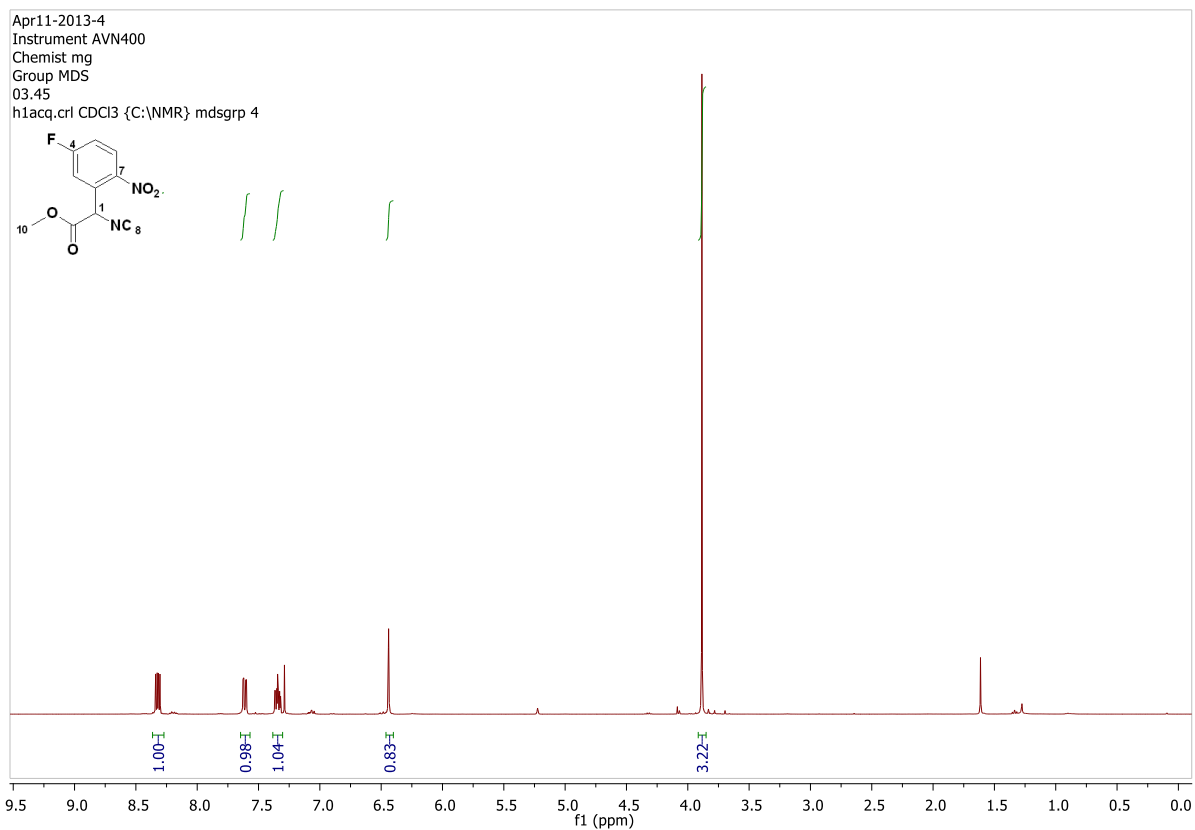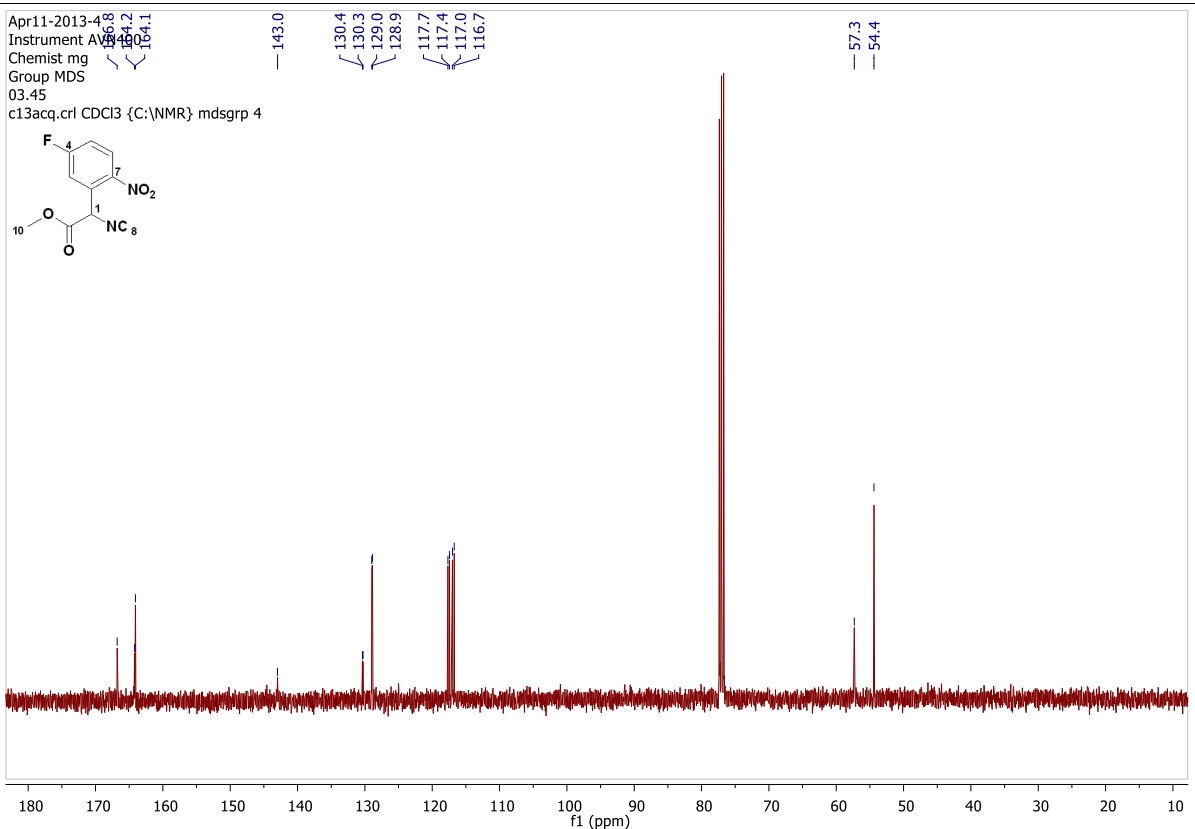

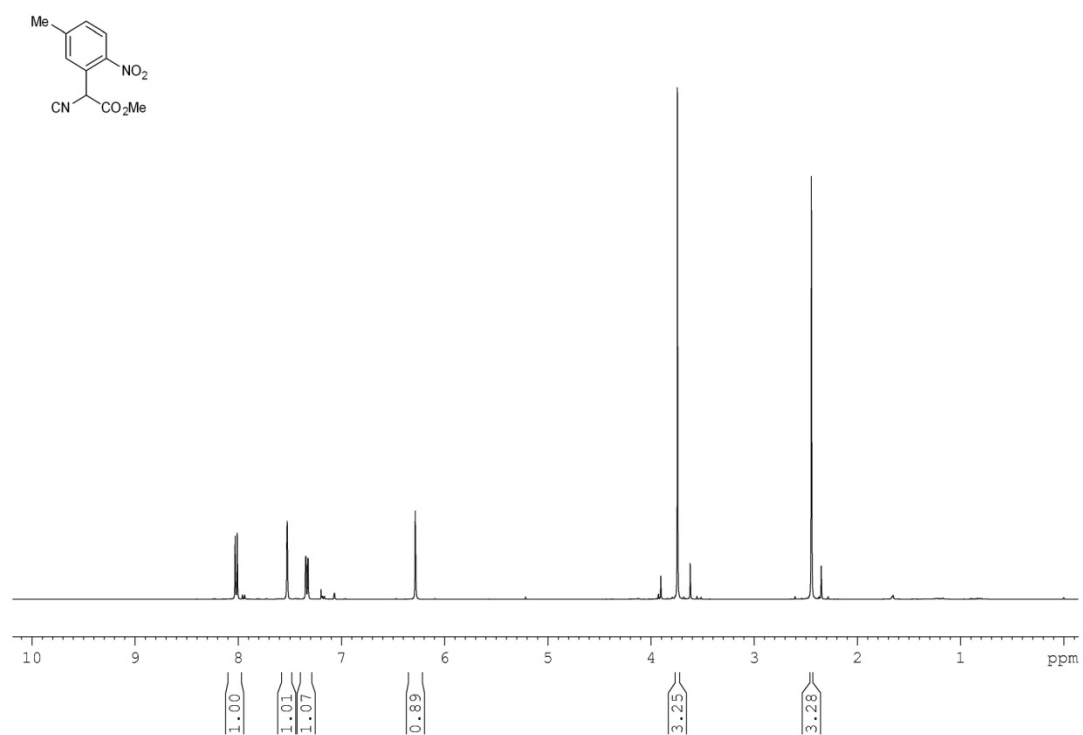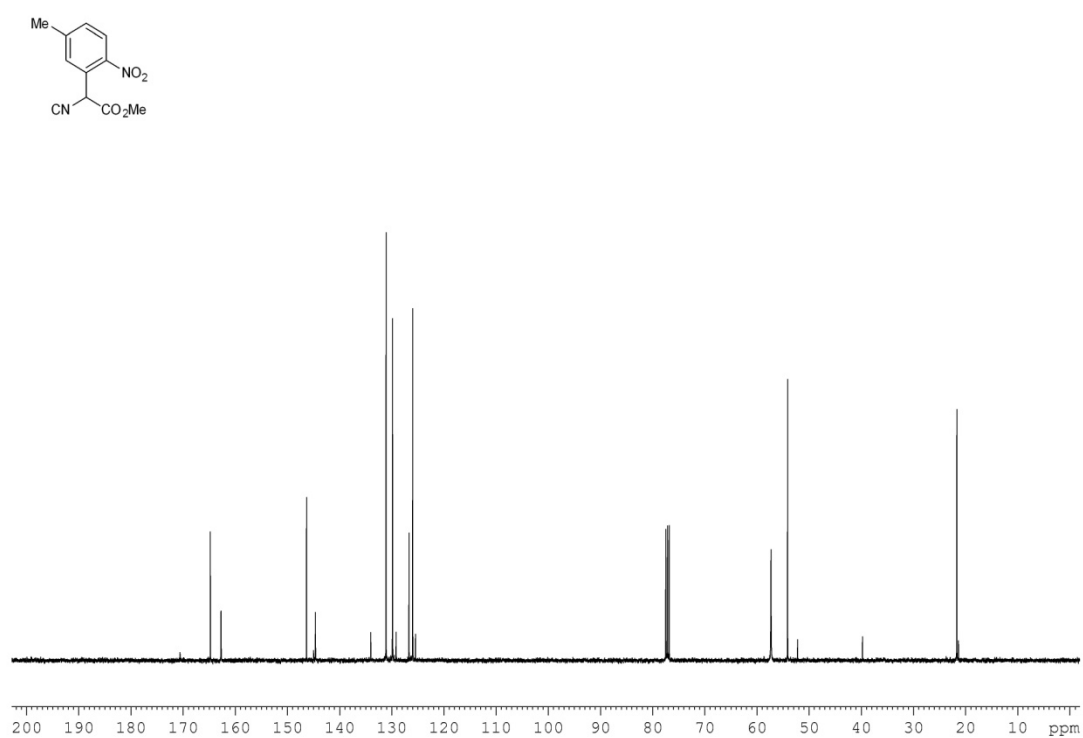

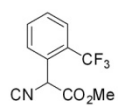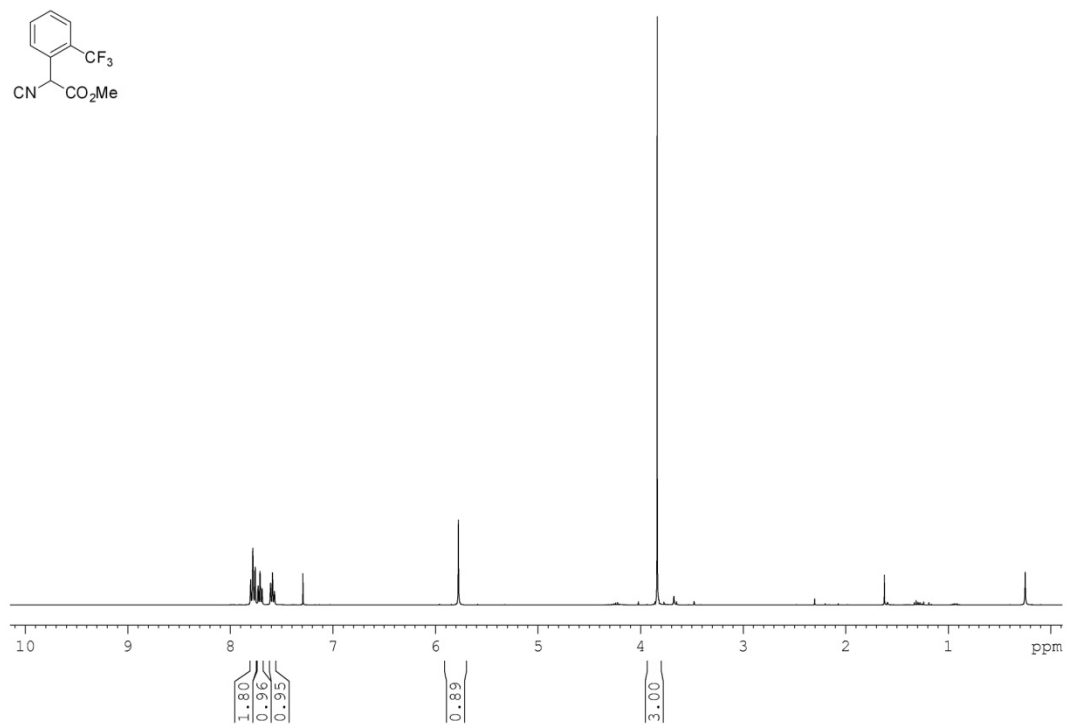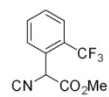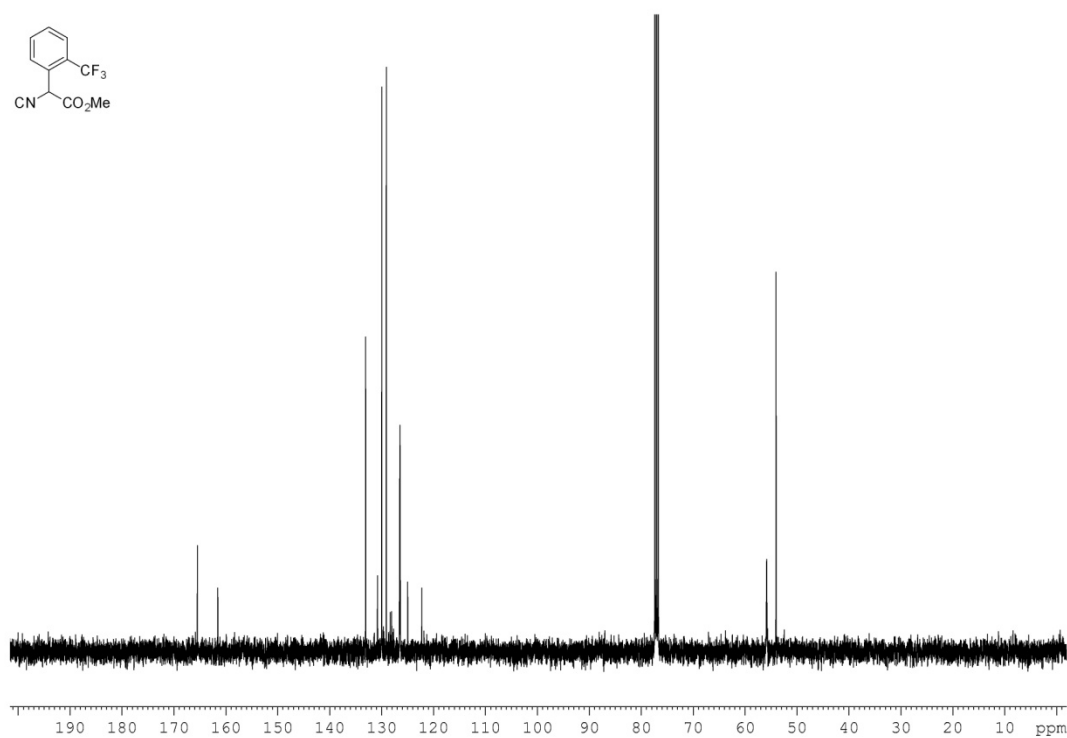

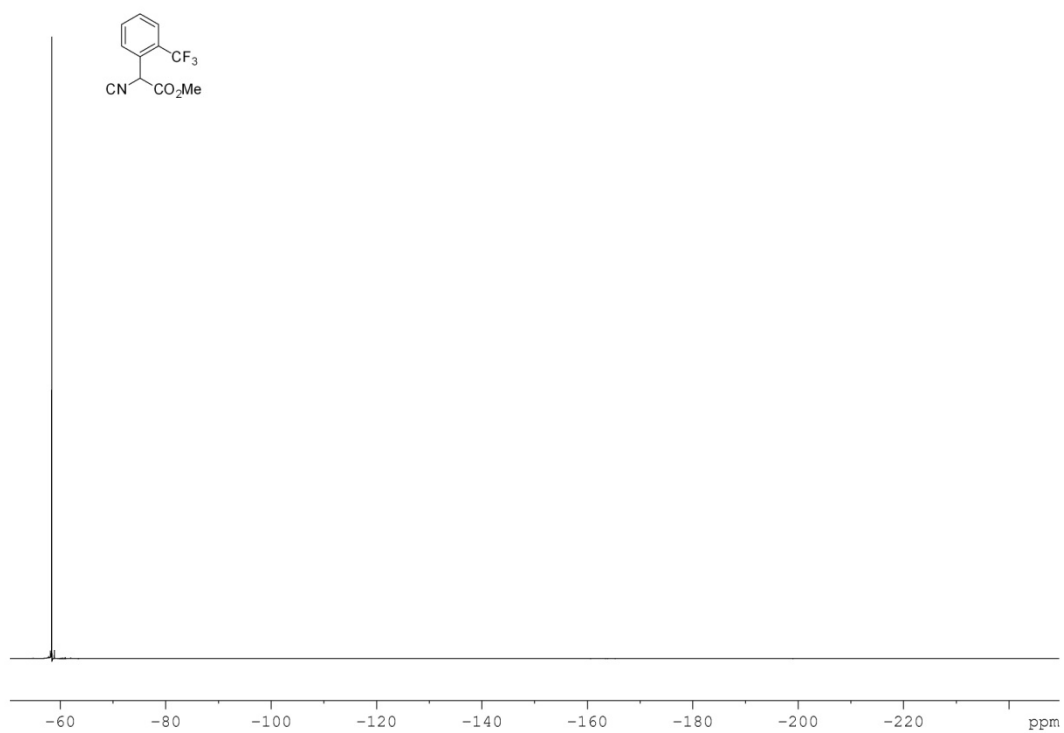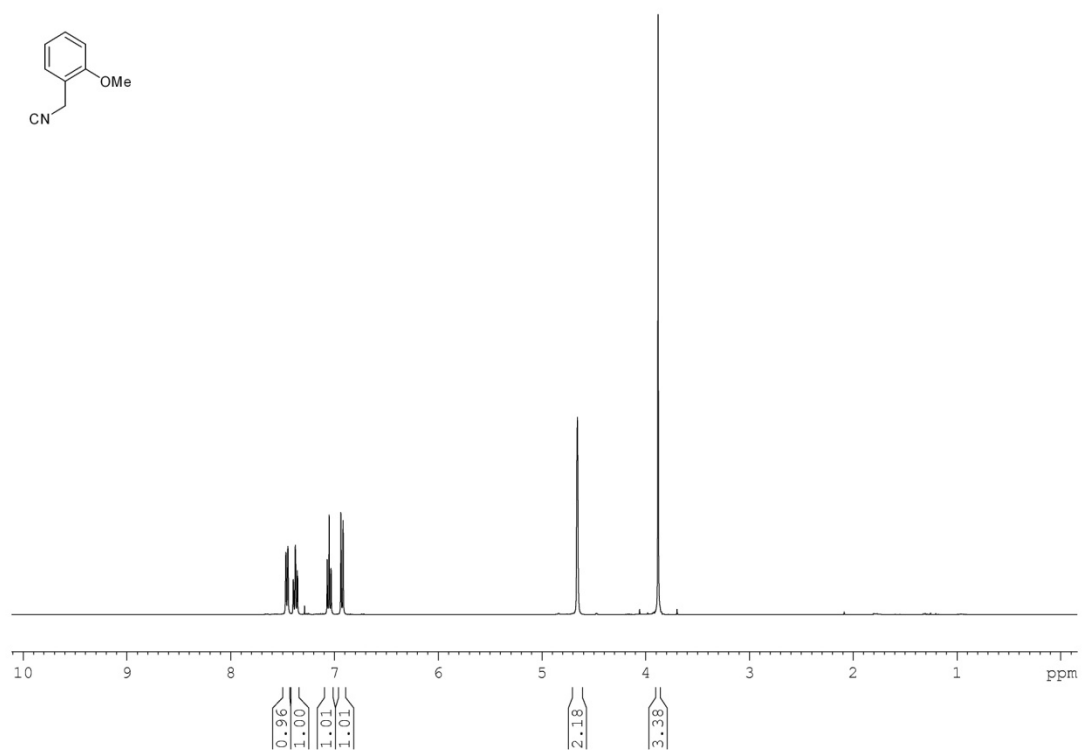



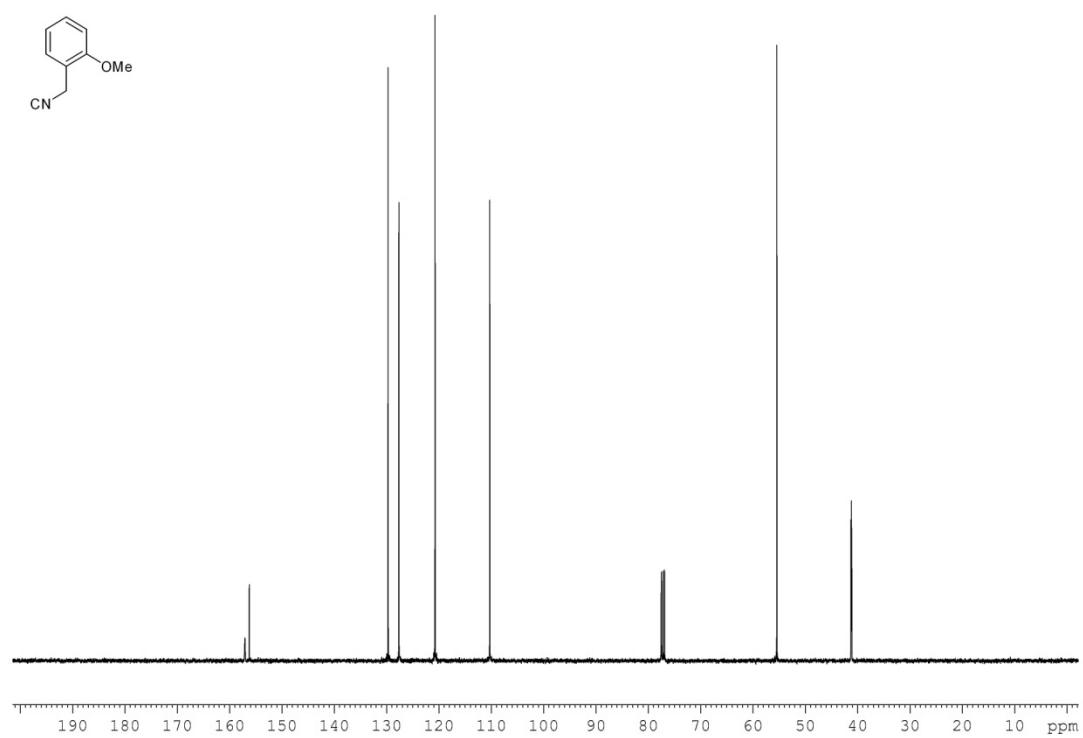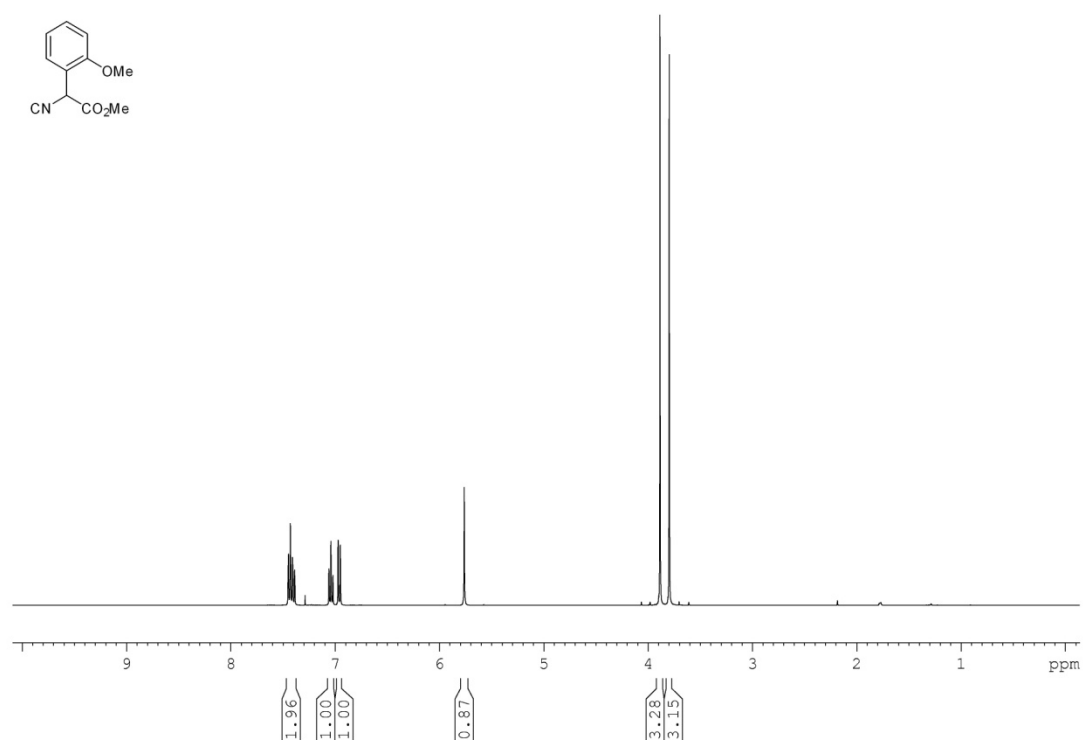

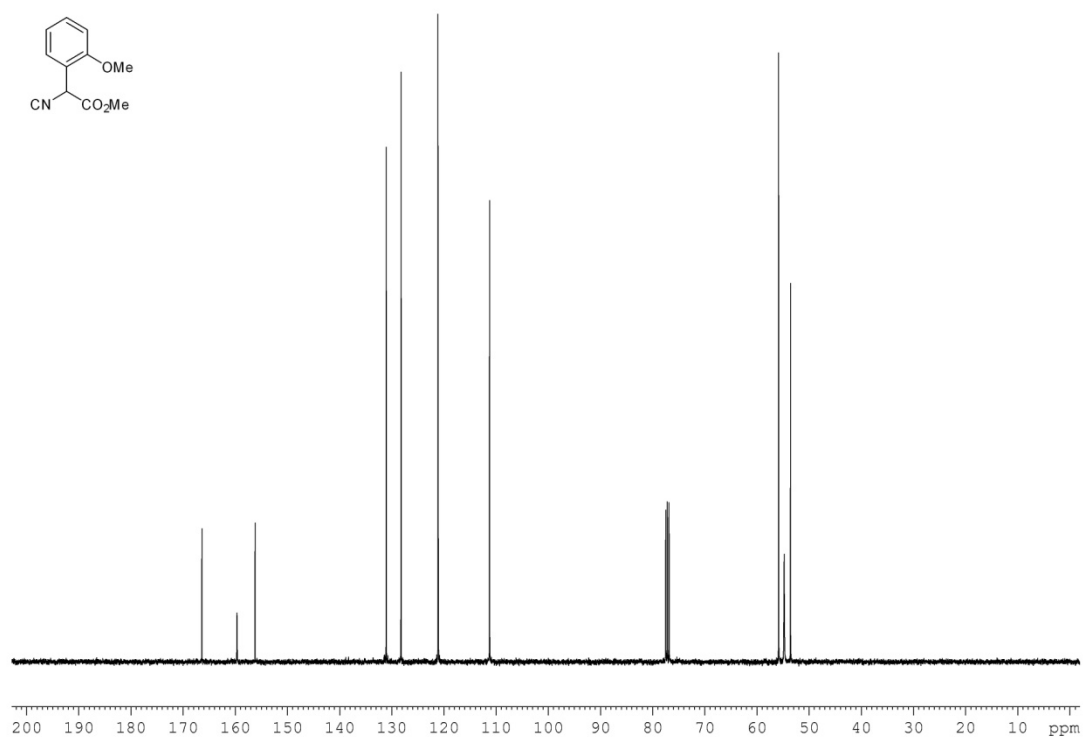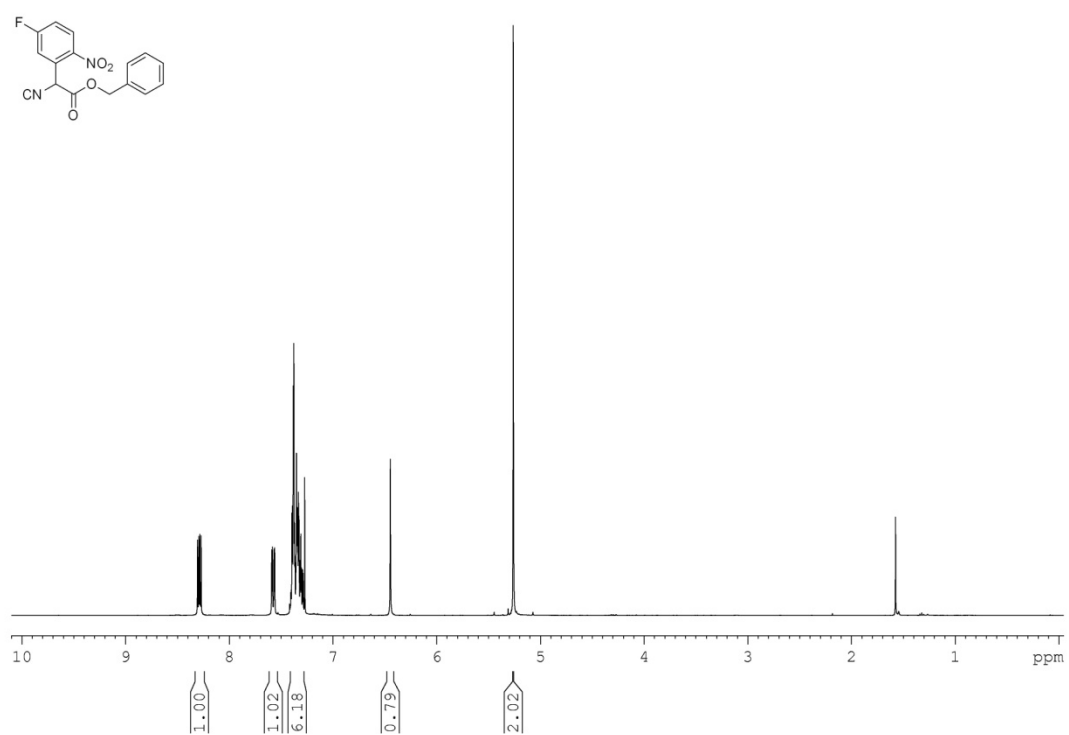

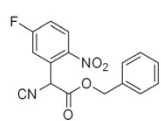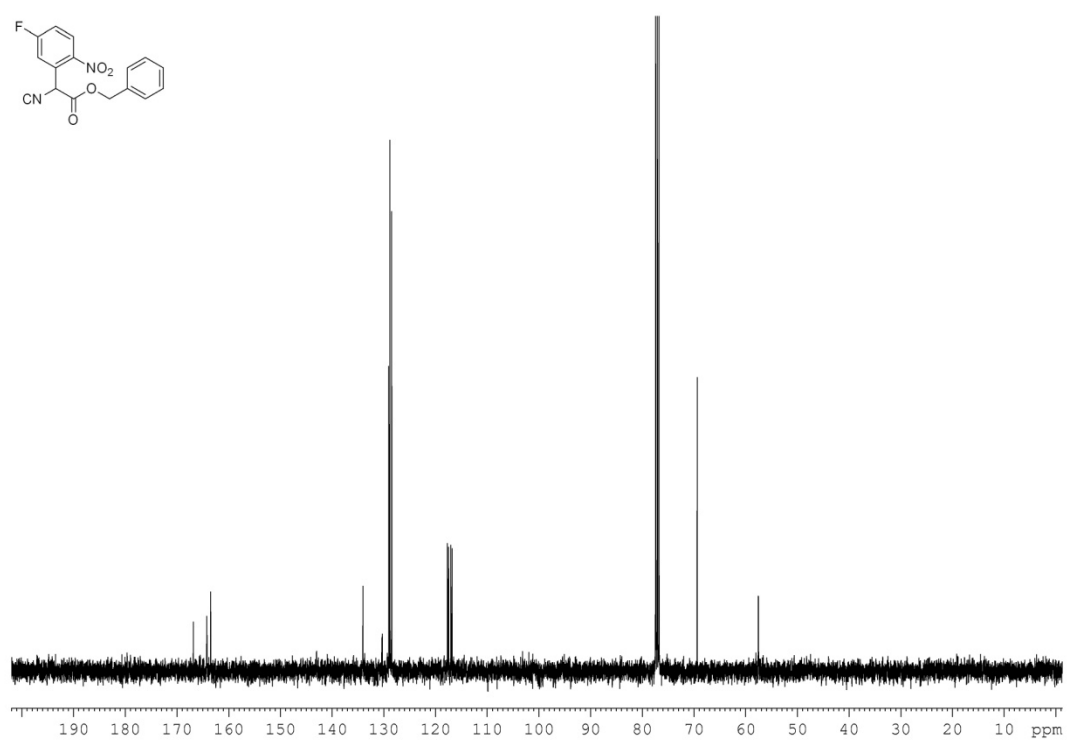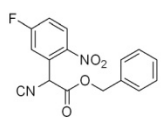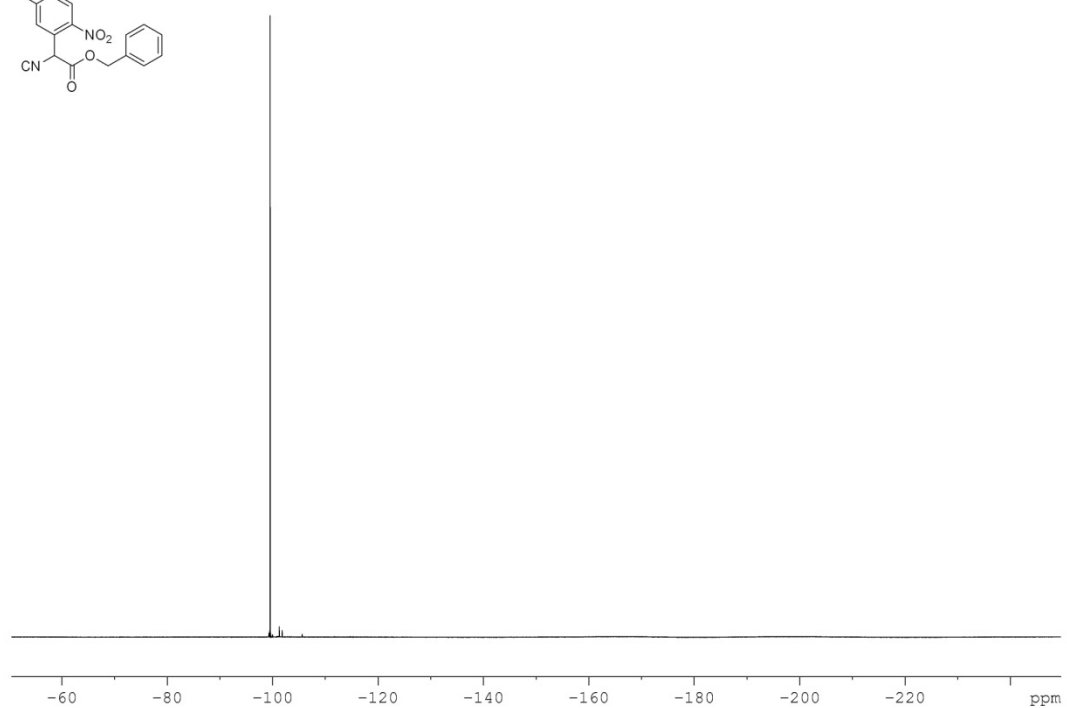

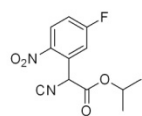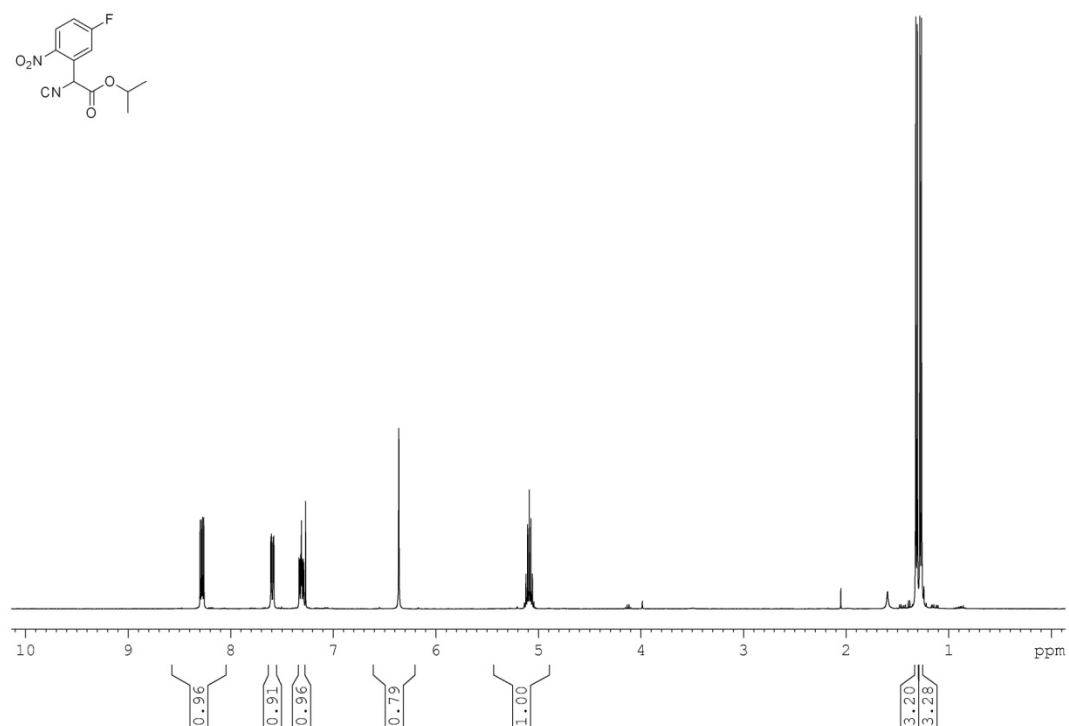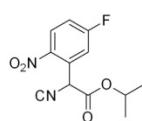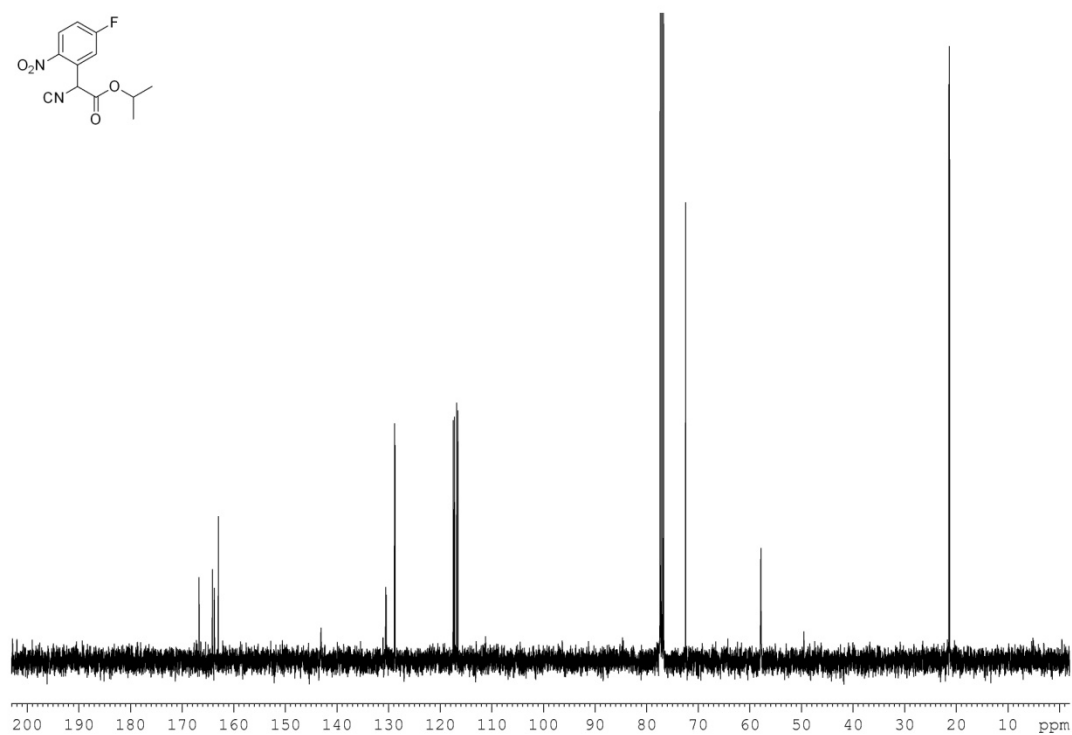

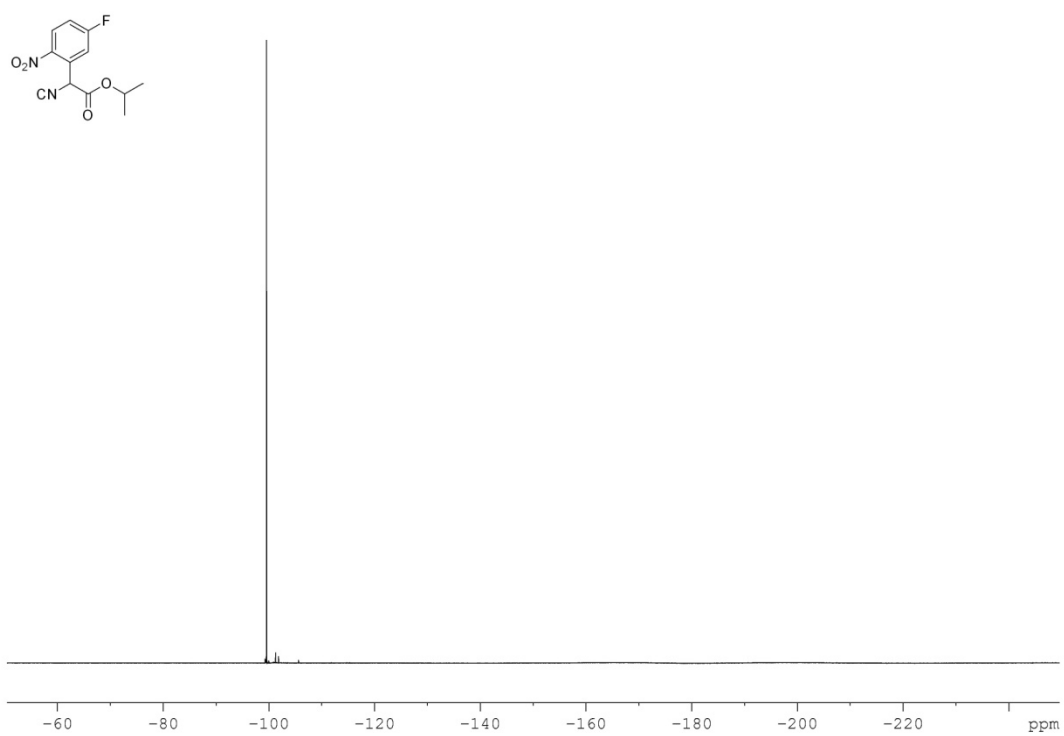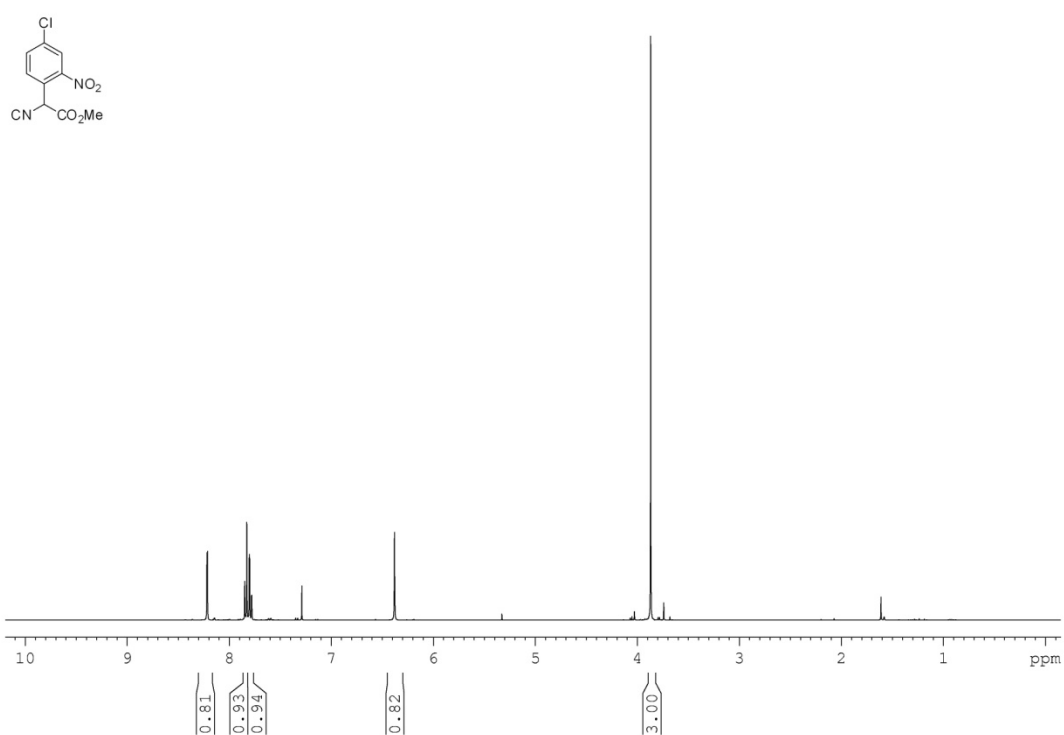

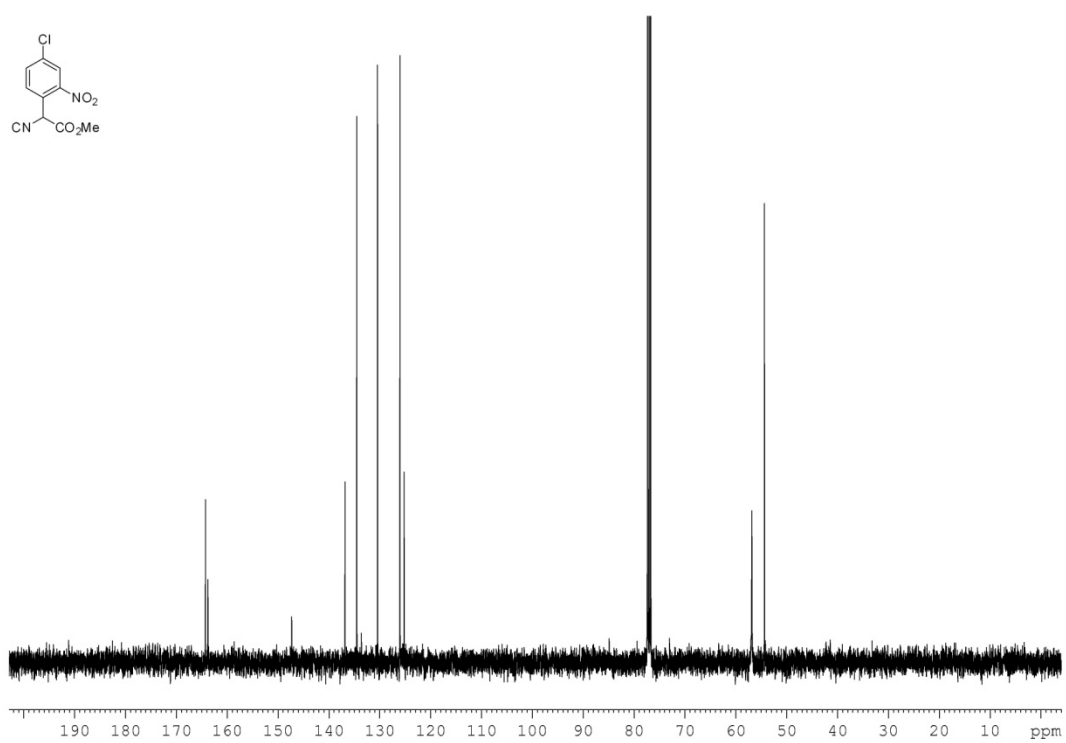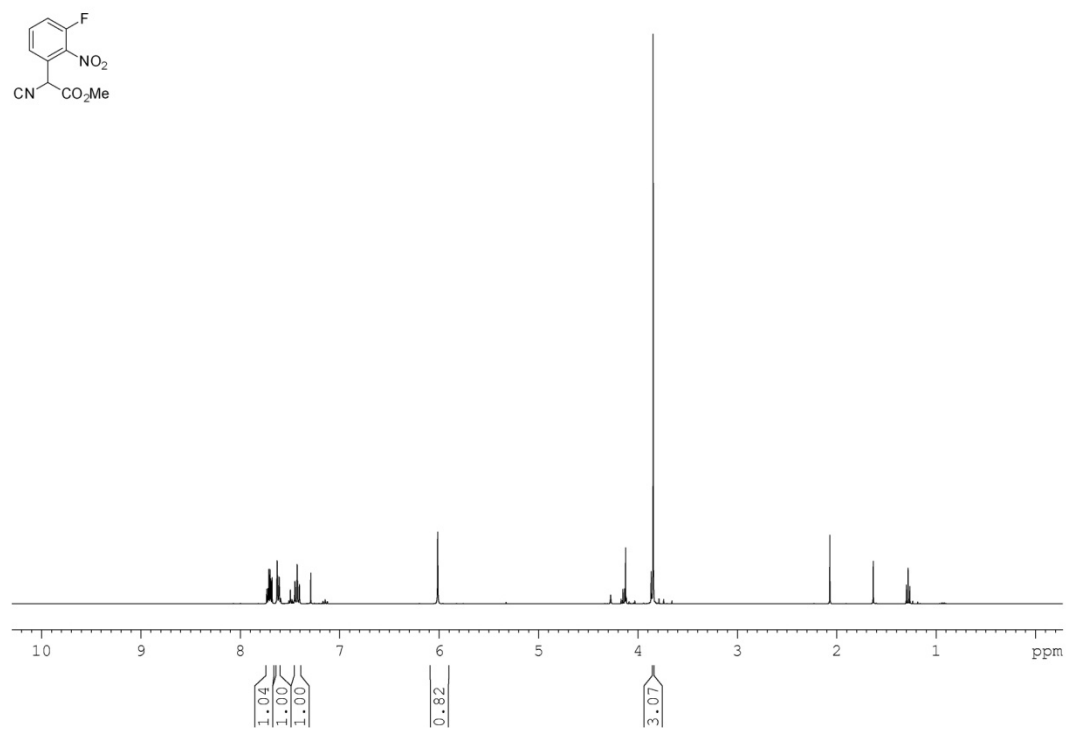

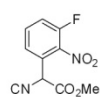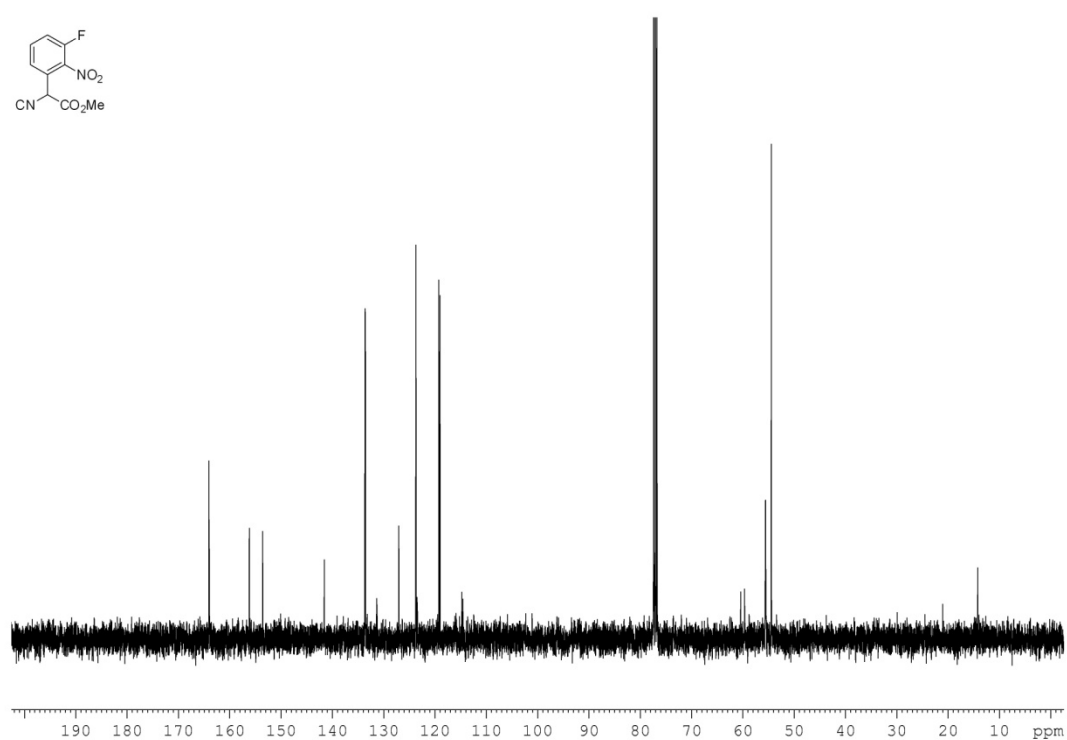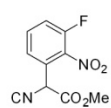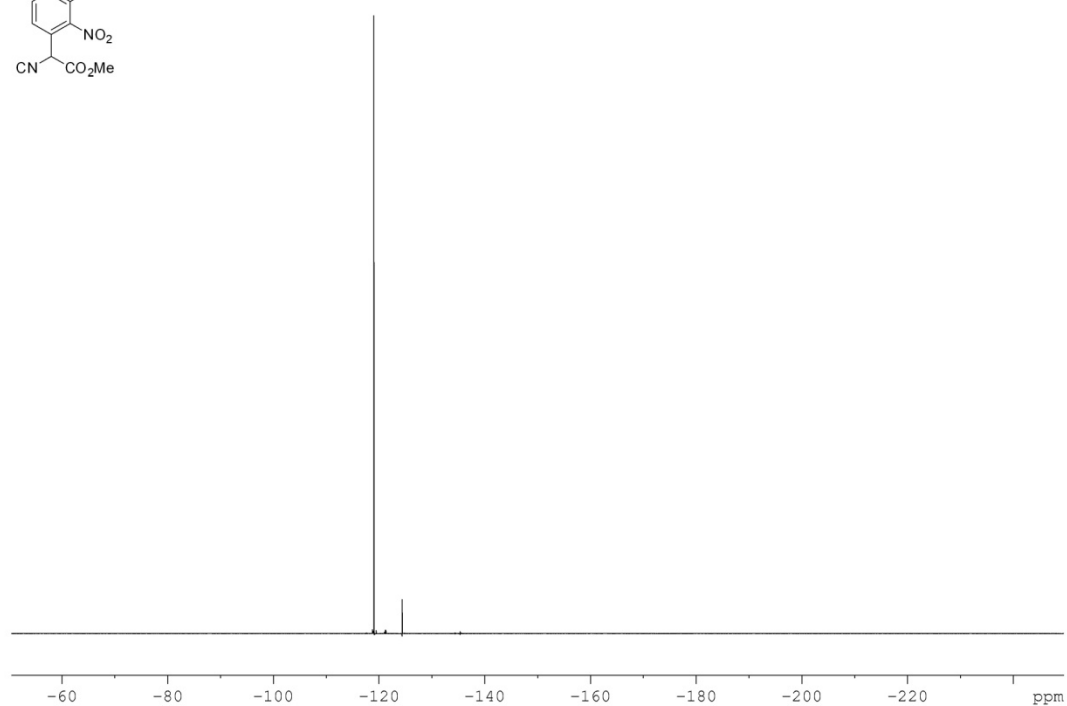

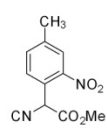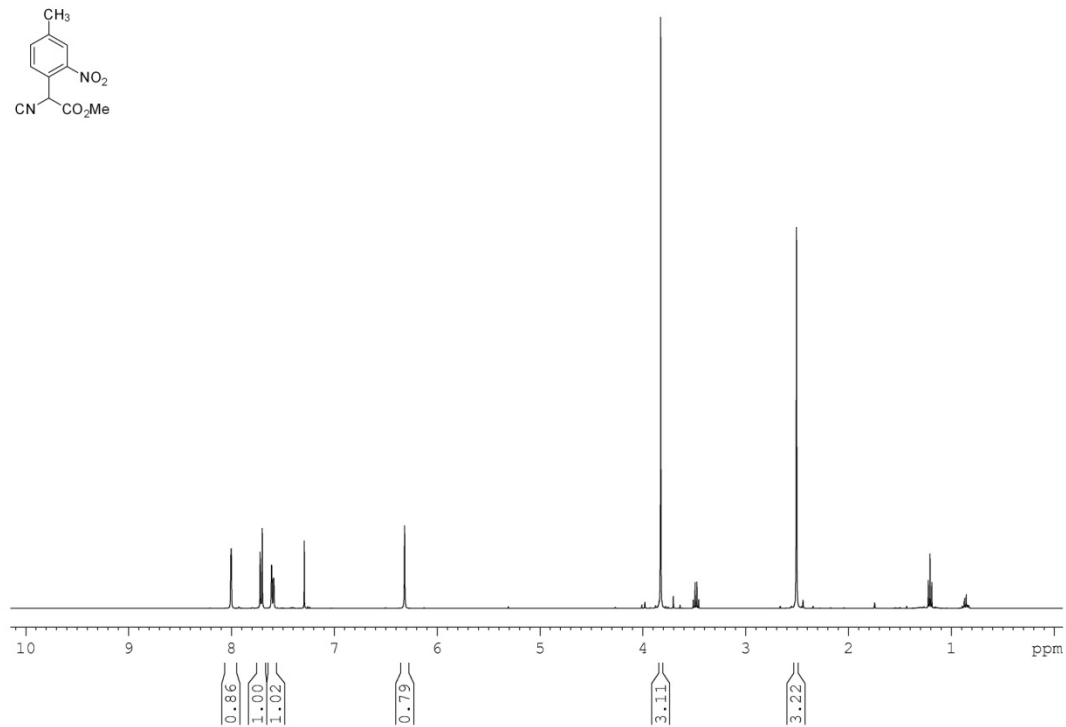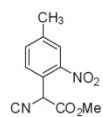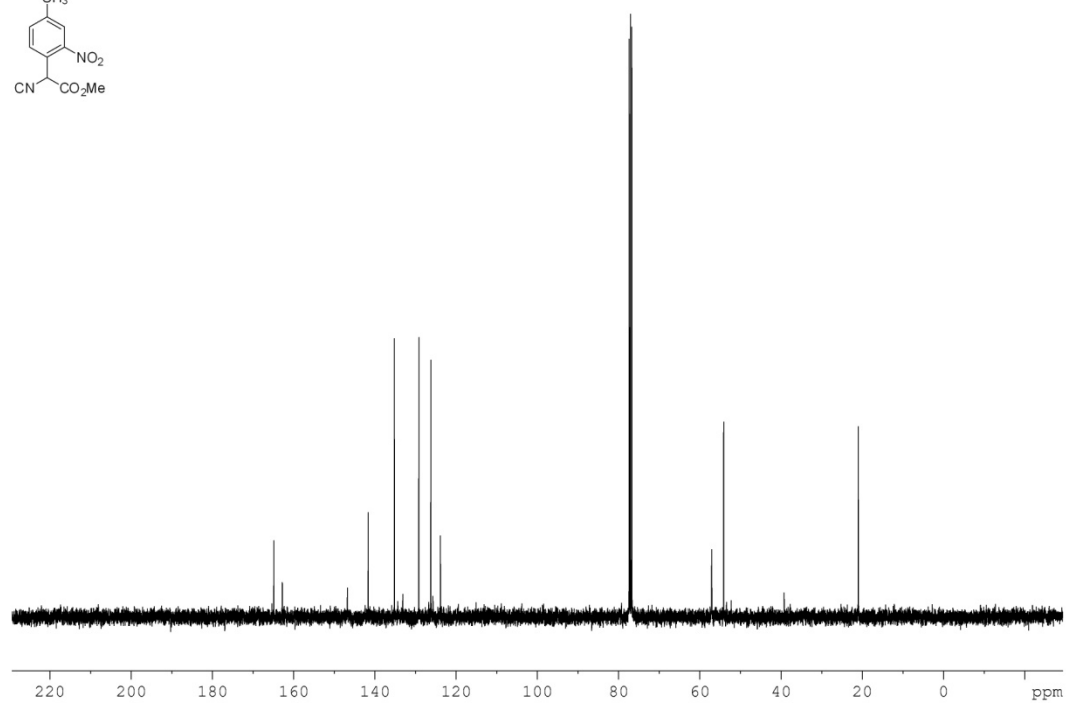



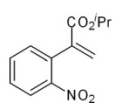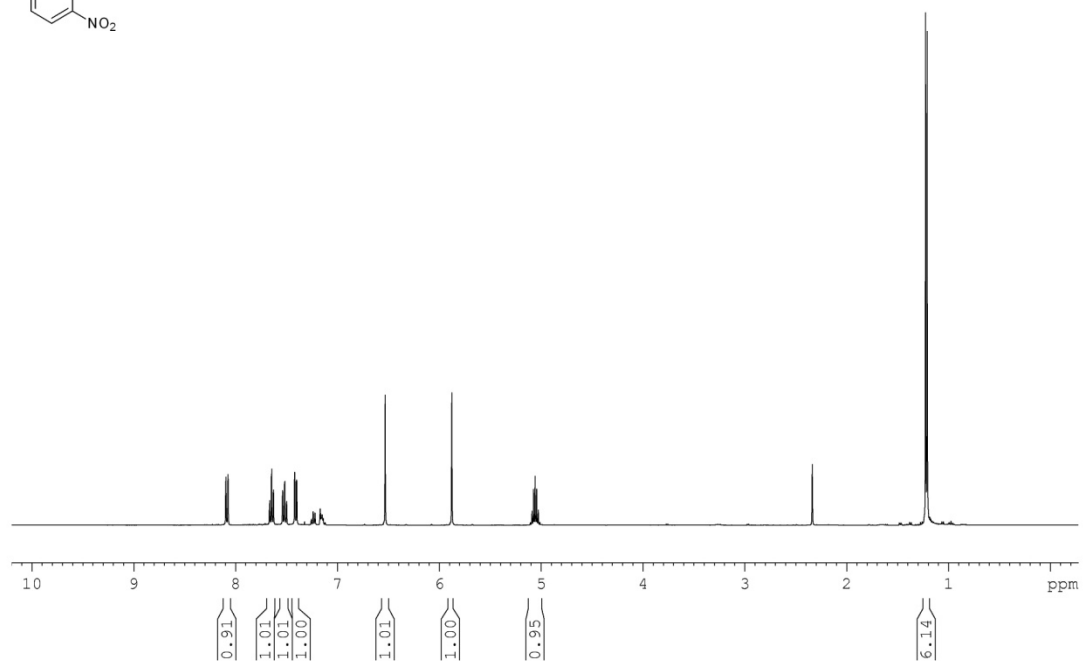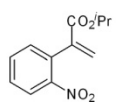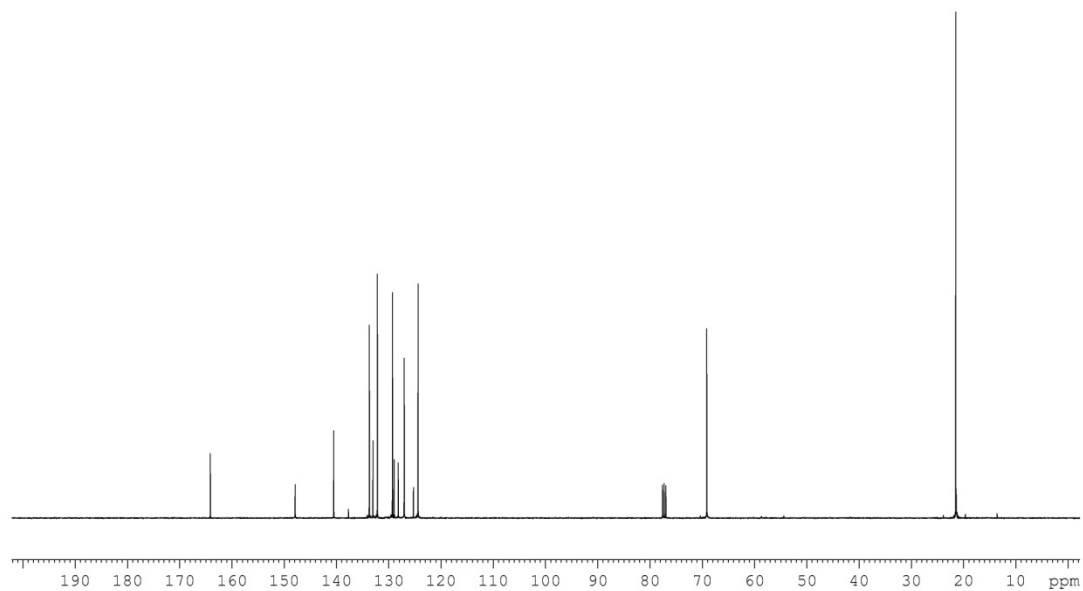

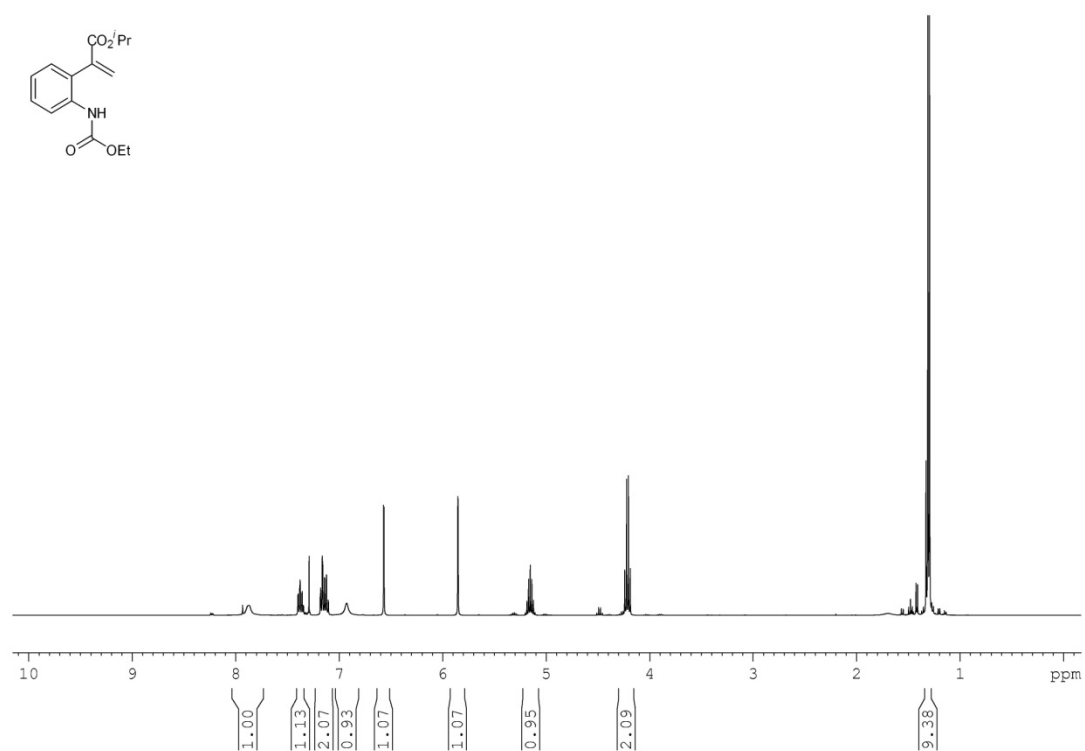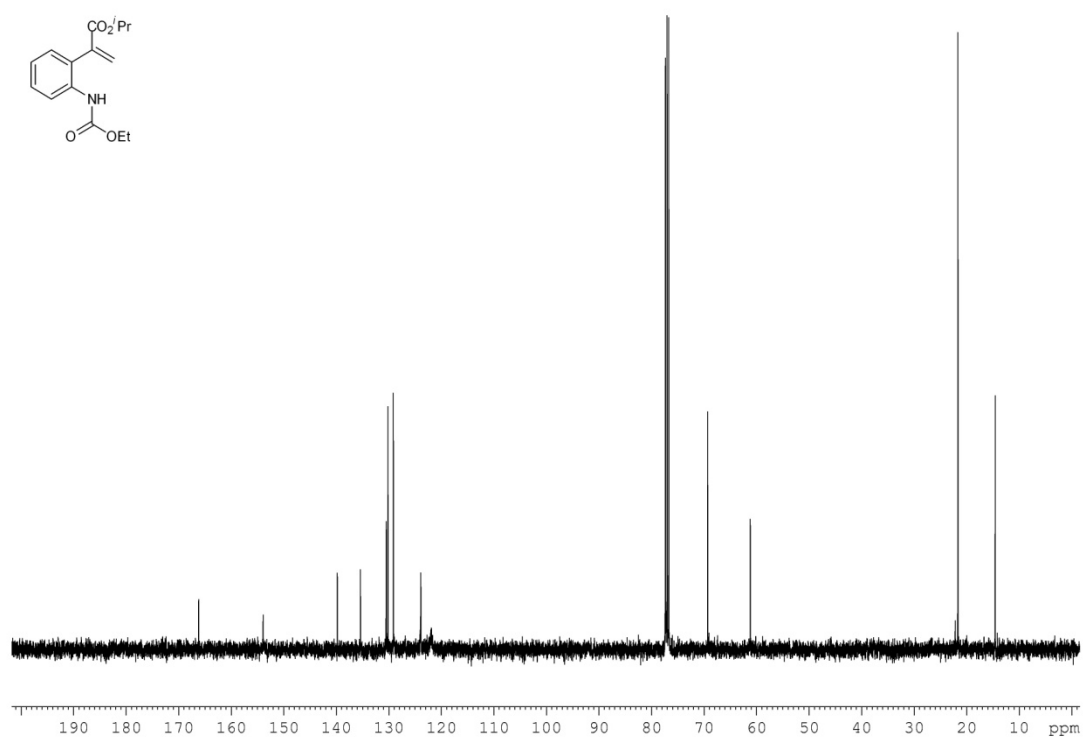

Jul15-2013-29  
 Instrument AVN400  
 Chemist KK  
 Group MDS  
 KK 009  
 h1acq.crl CDCl3 {C:\NMR} mdsgrp 29

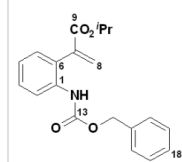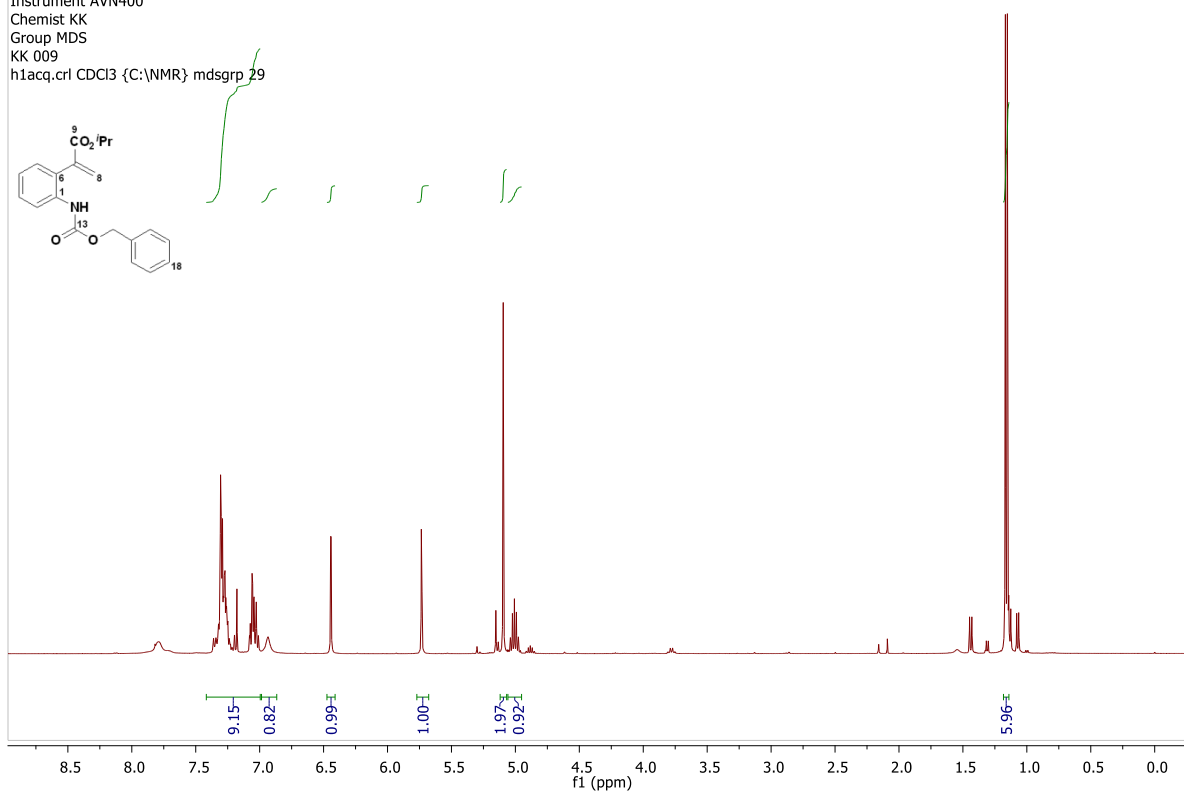

Jul15-2013-29  
 Instrument AVN400  
 Chemist KK  
 Group MDS  
 KK 009  
 c13acq.crl CDCl3 {C:\NMR} mdsgrp 29

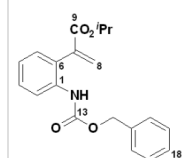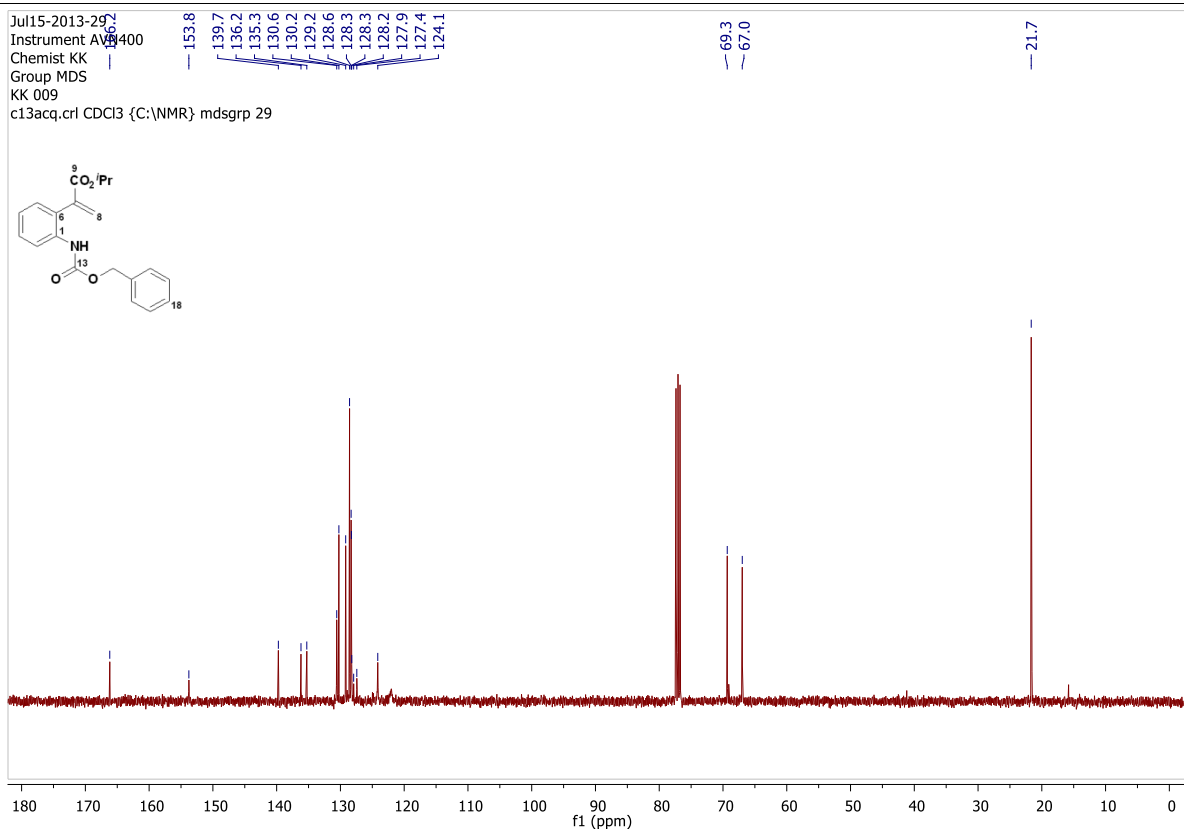

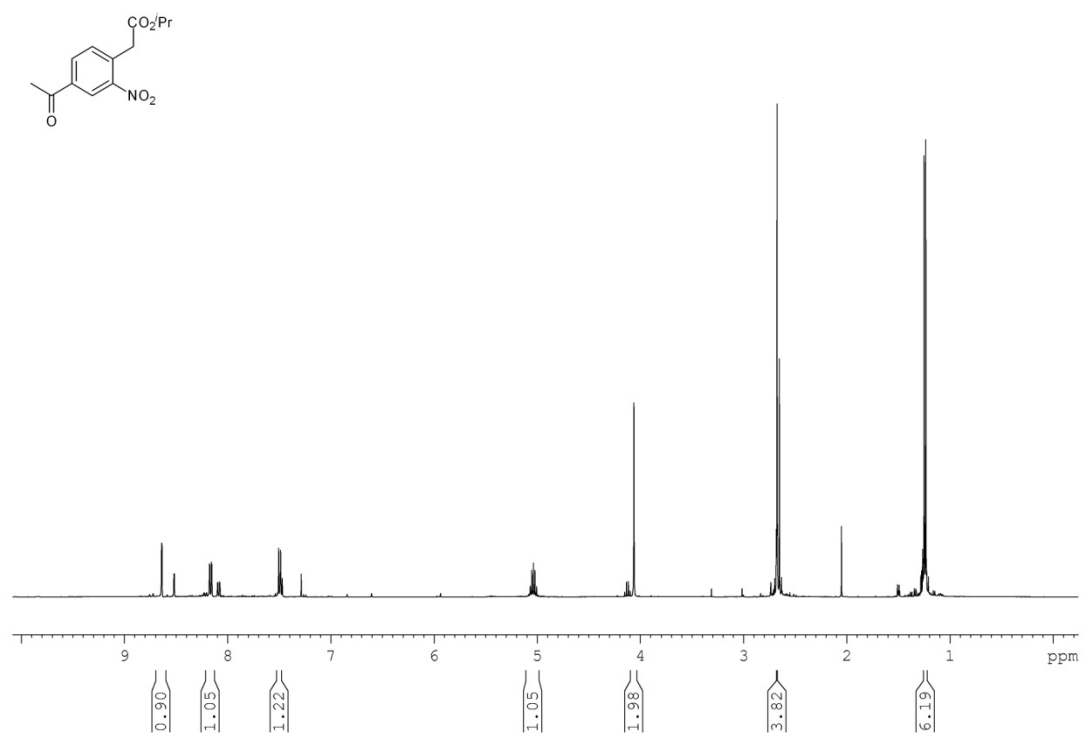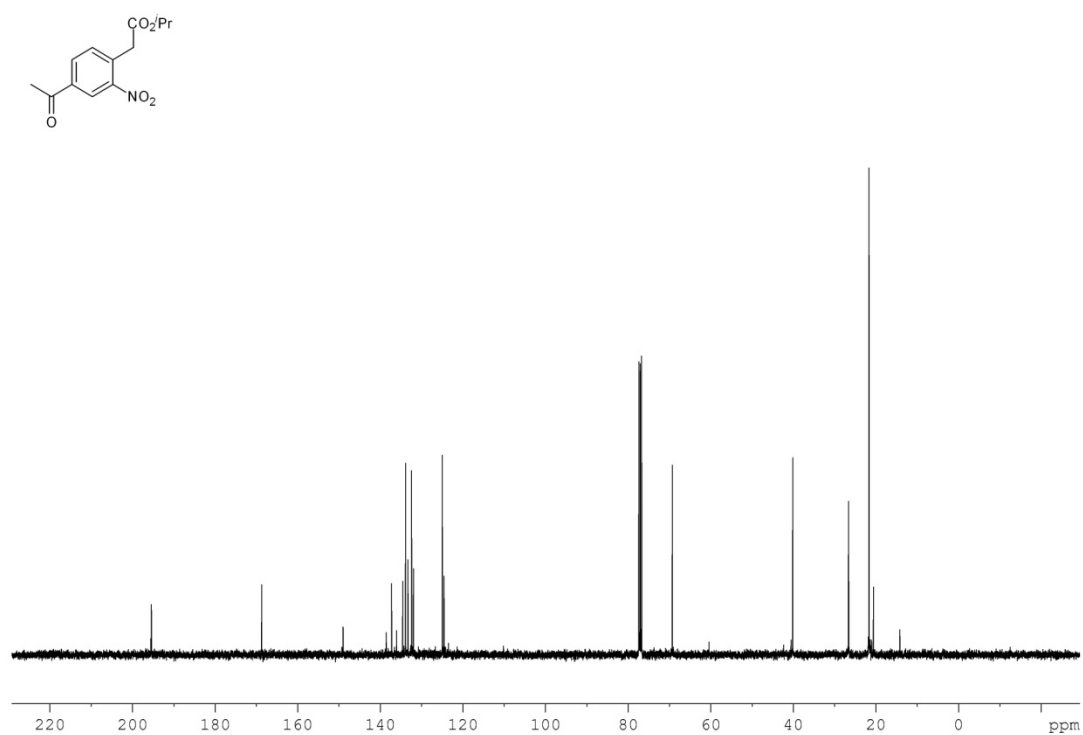

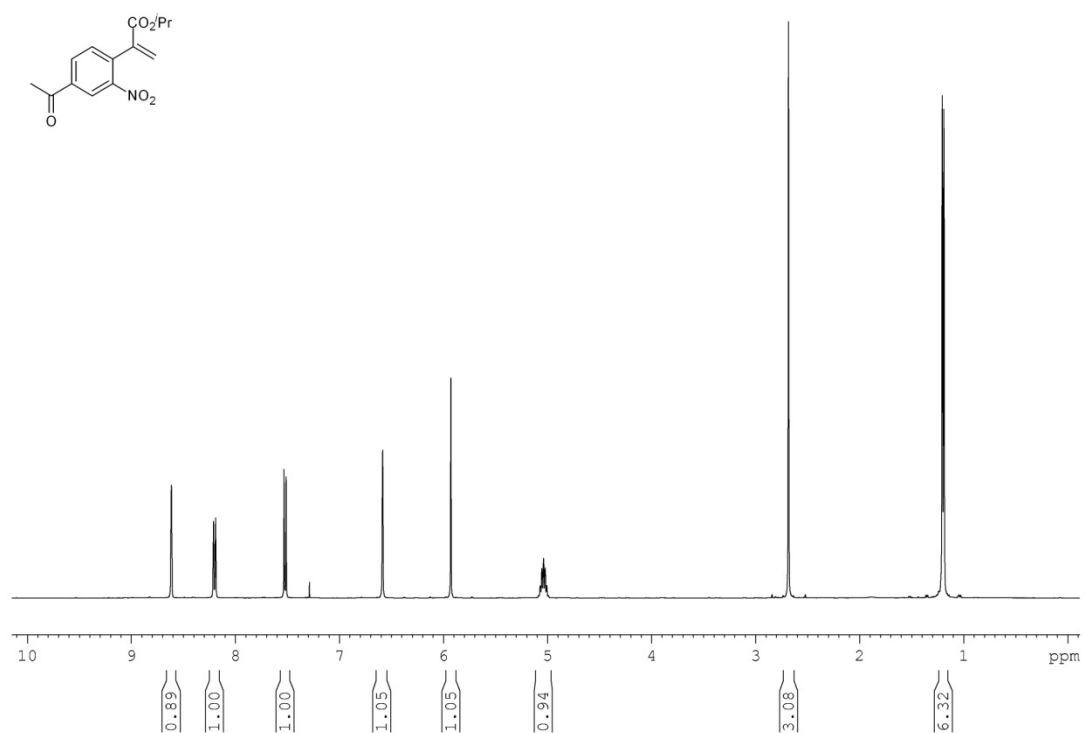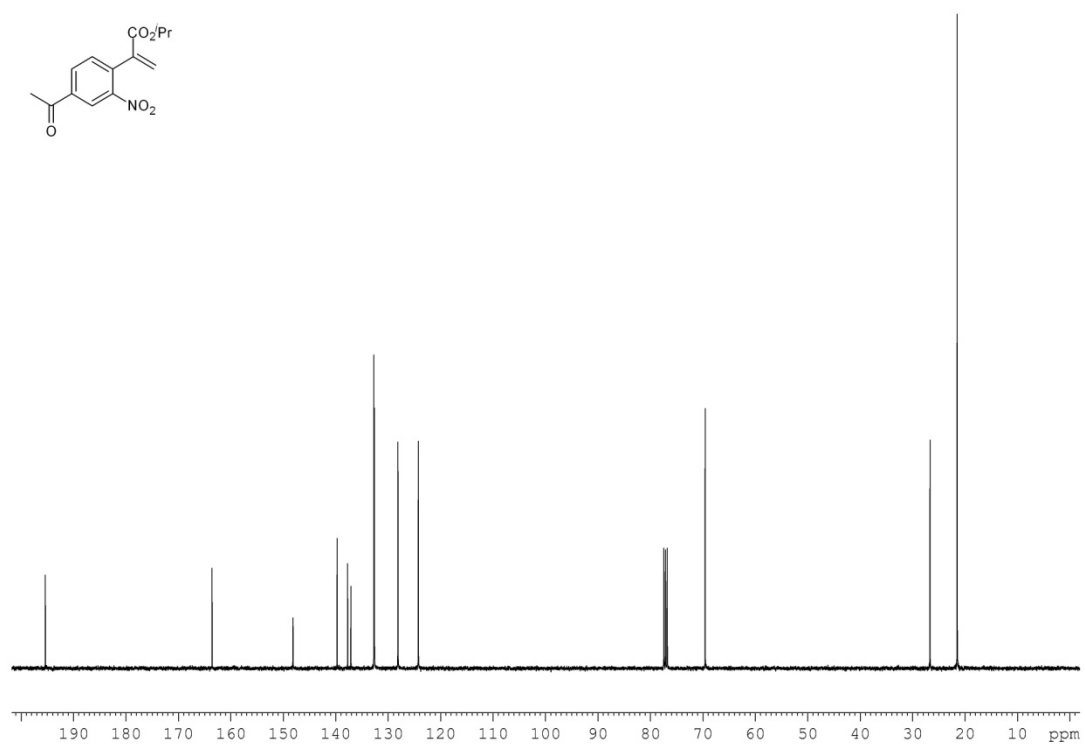

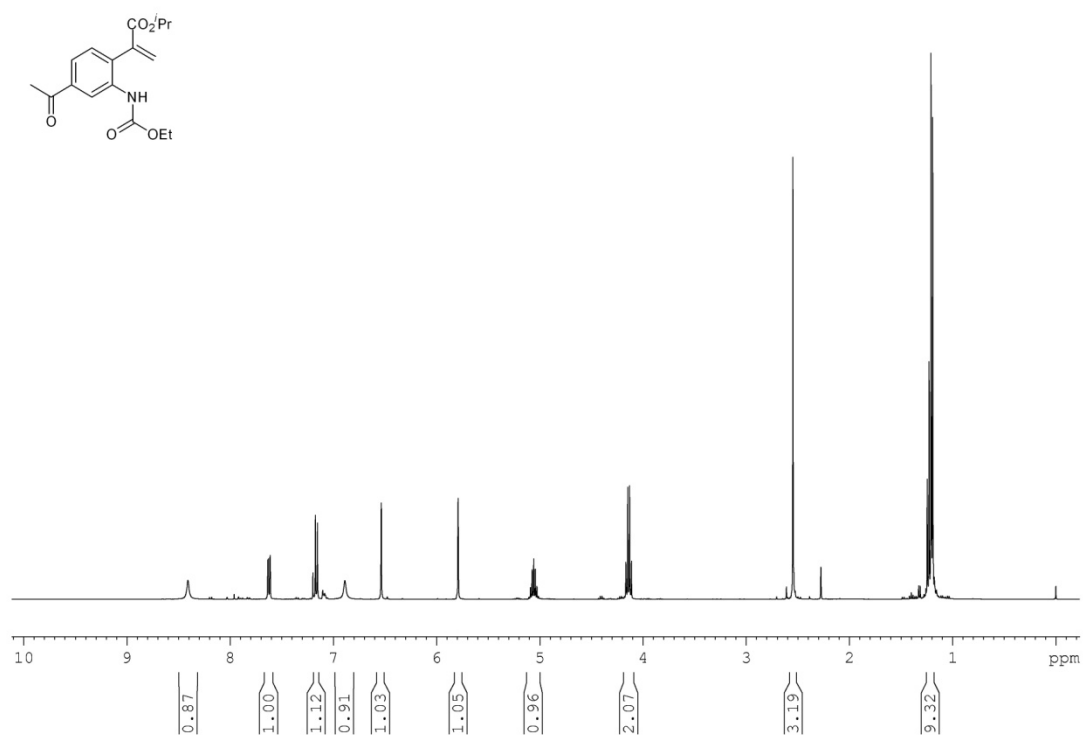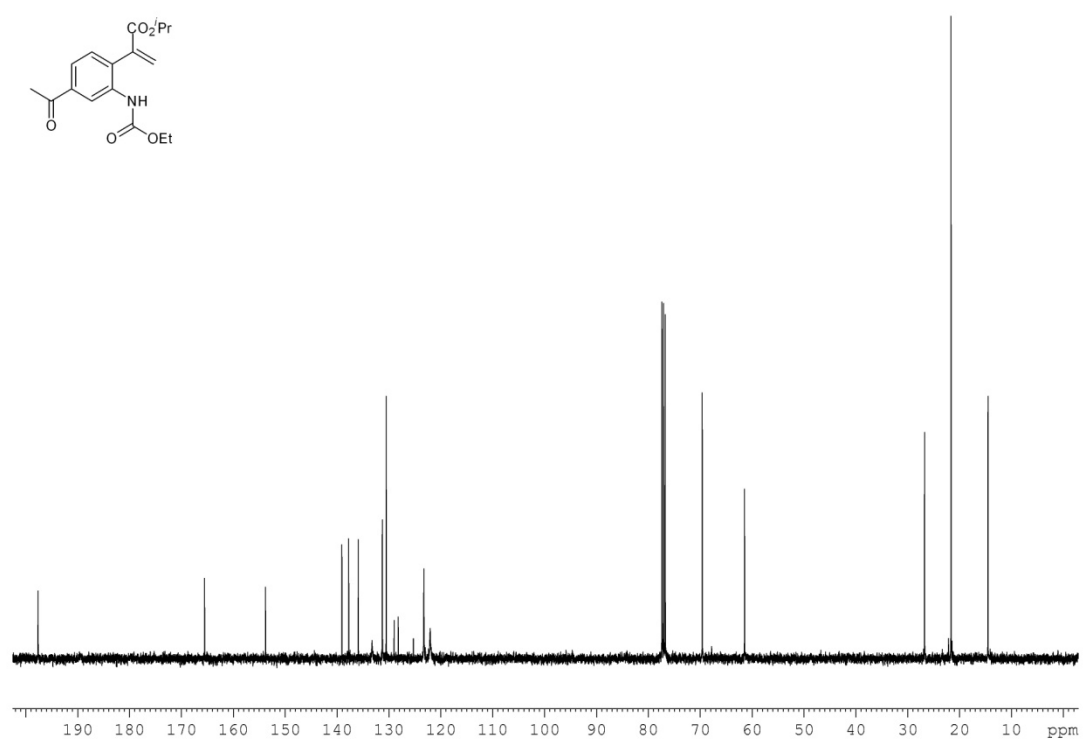

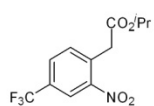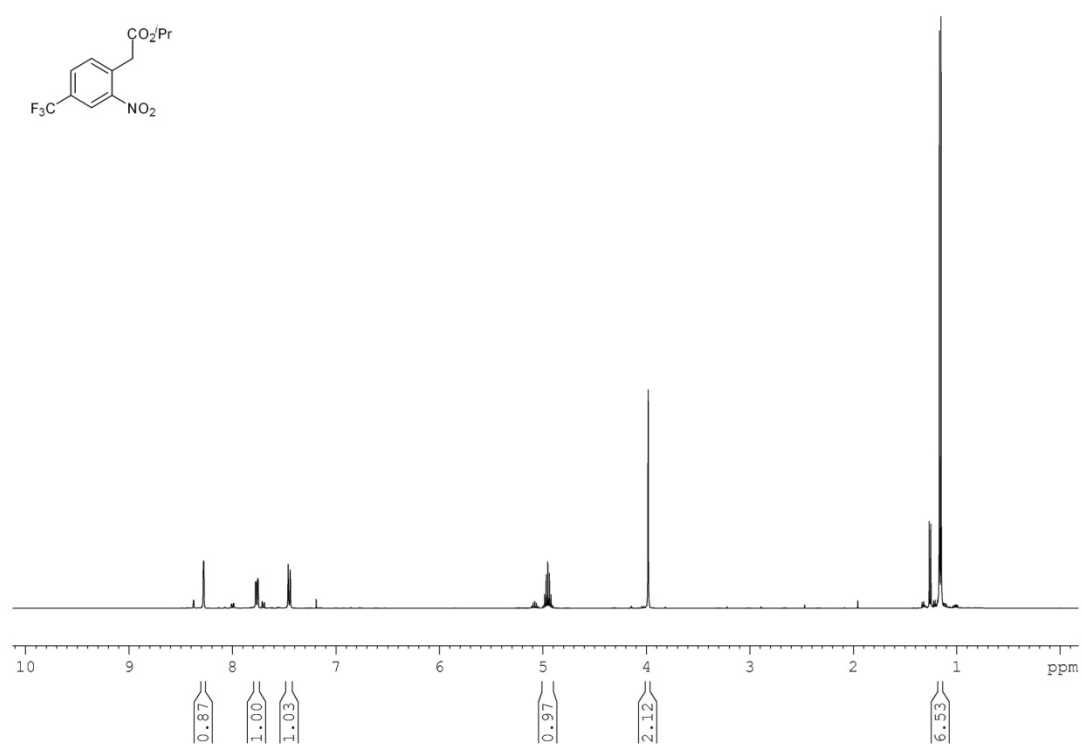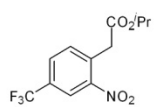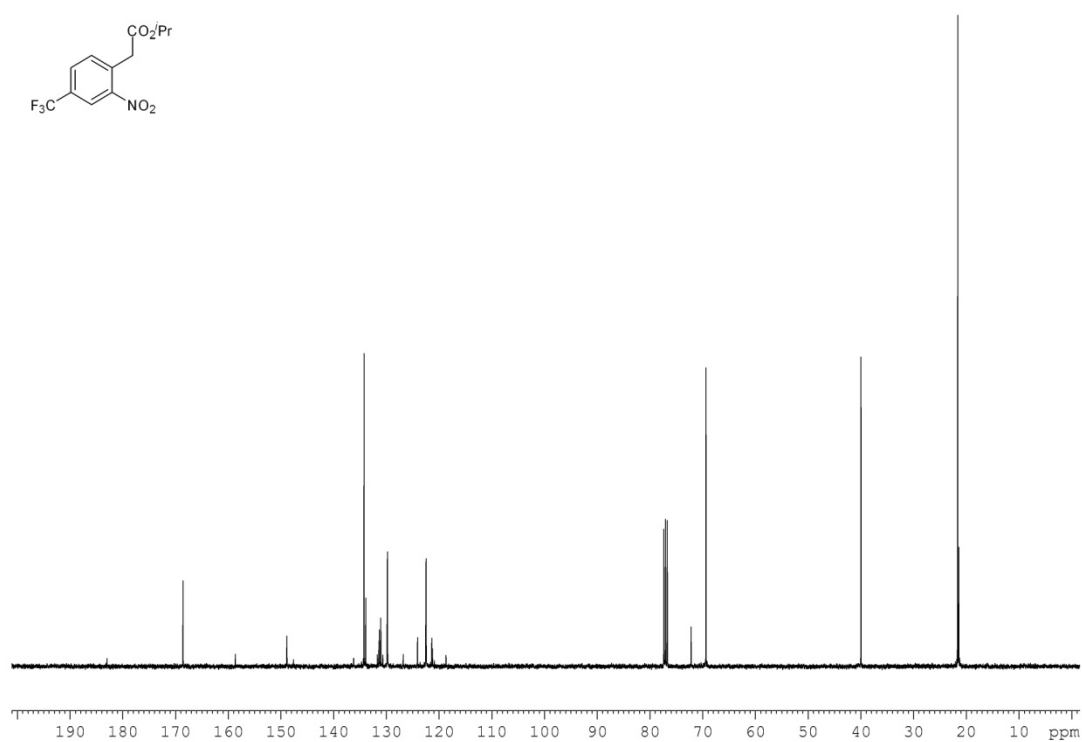

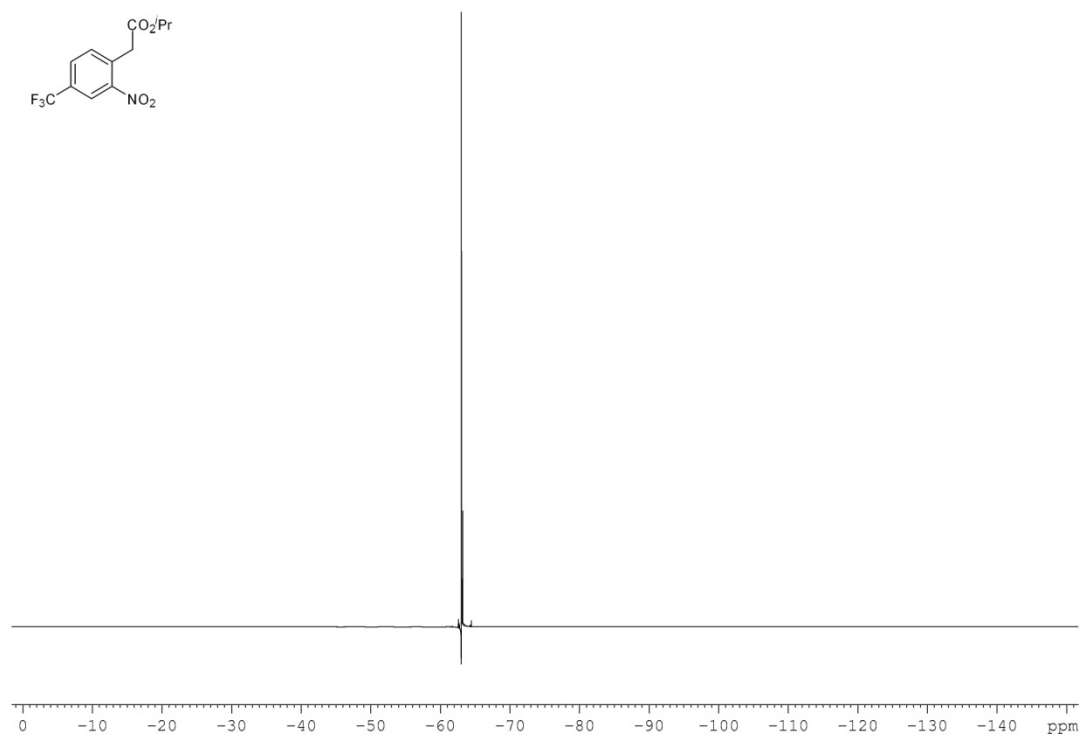

Jul27-2013-2  
Instrument AVN400  
Chemist mg  
Group MDS  
04.78  
h1acq.crl CDCl3 {C:\NMR} mdsgrp 2

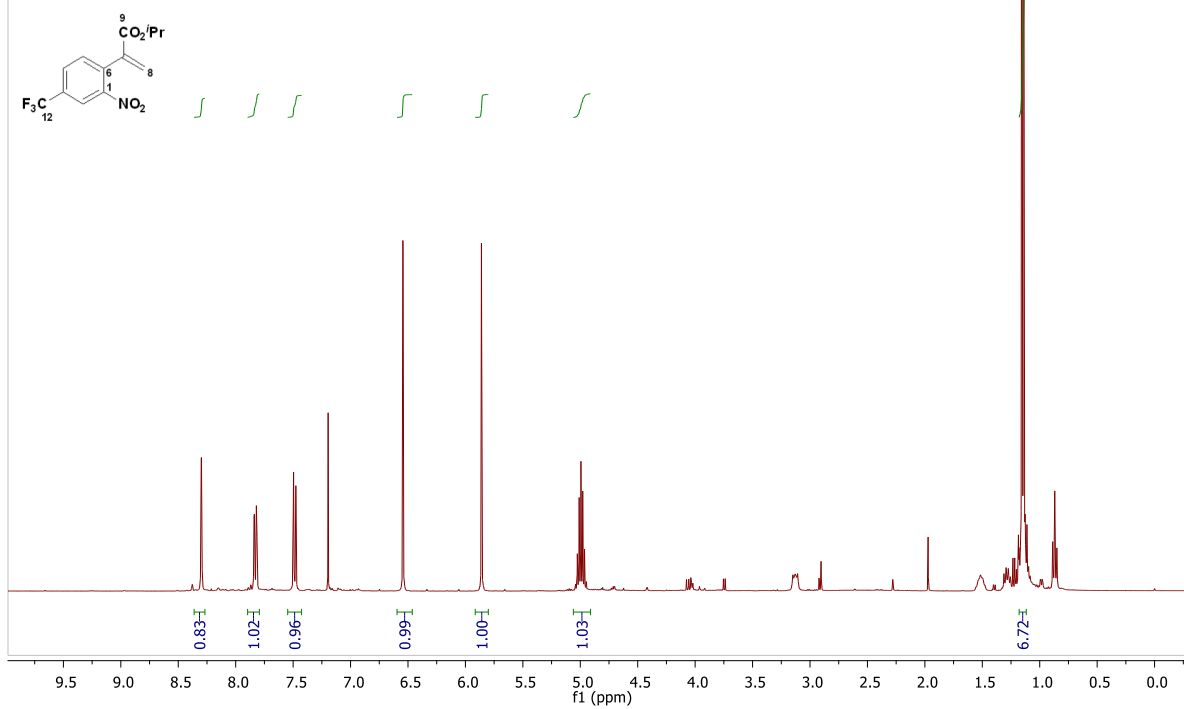



Jul27-2013-2  
 Instrument AVN400  
 Chemist mg  
 Group MDS  
 04.78  
 c13acq.crl CDCl3 {C:\NMR} mdsgrp 2

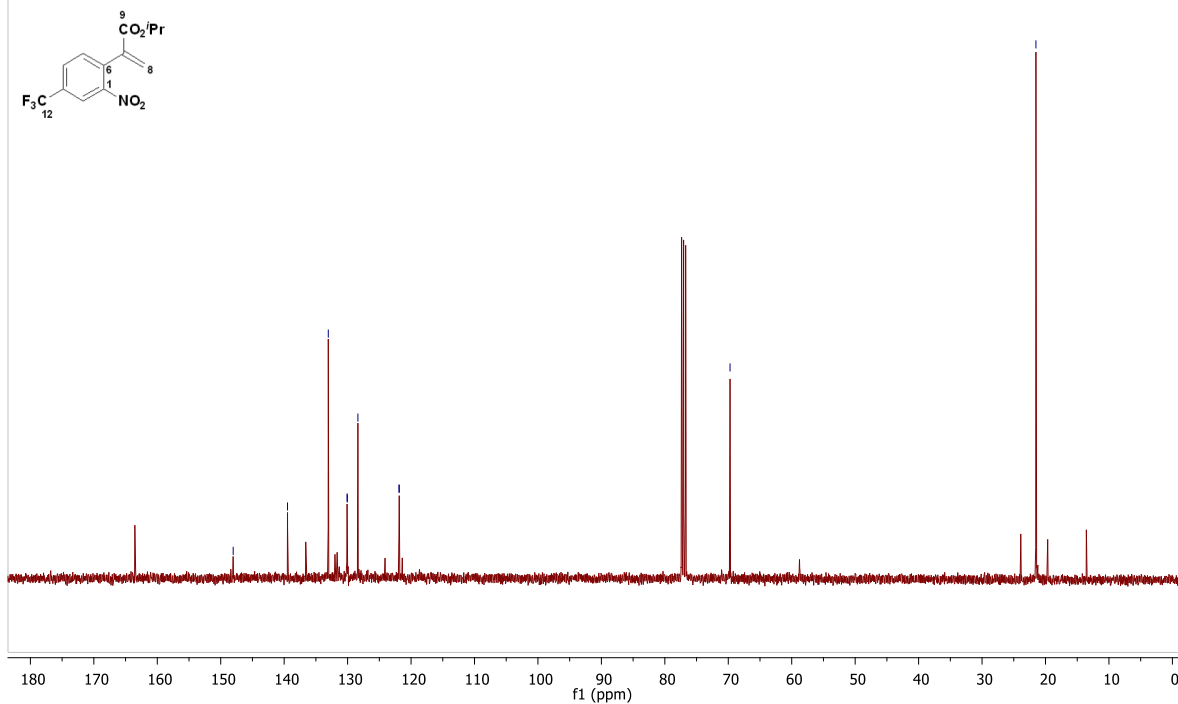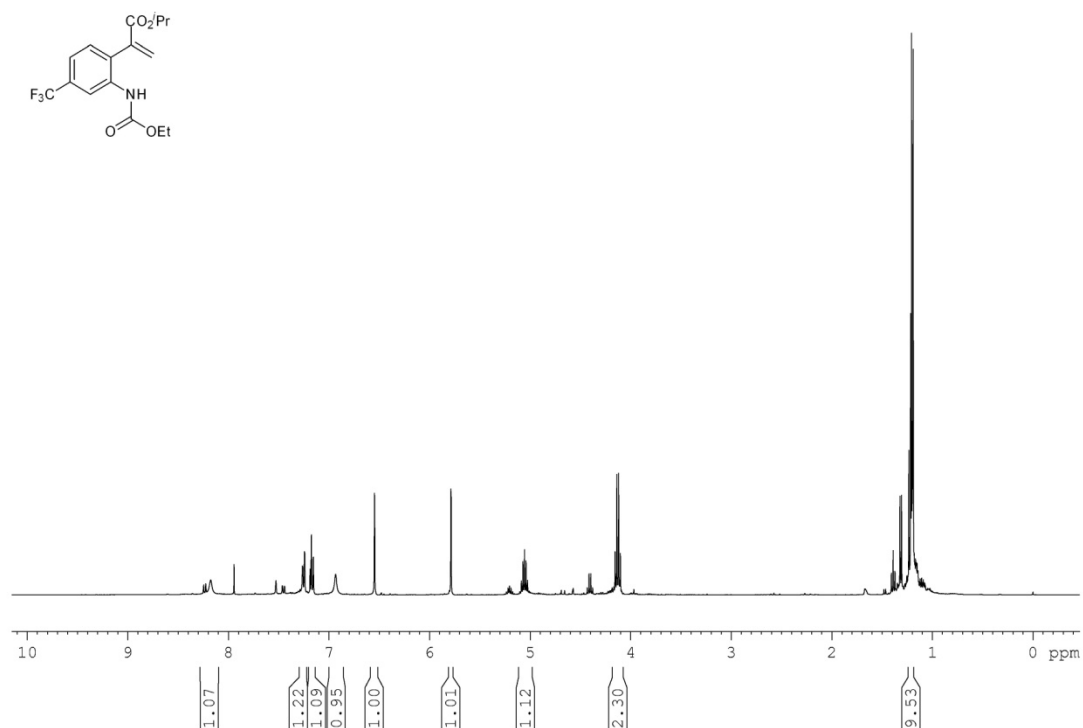

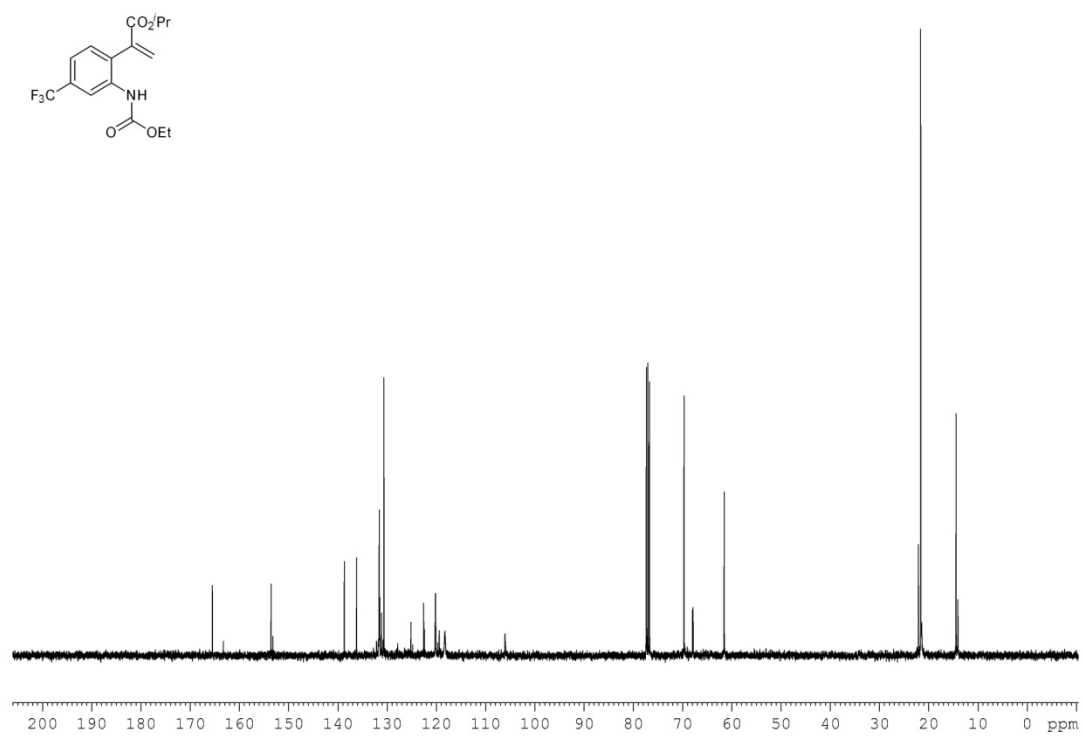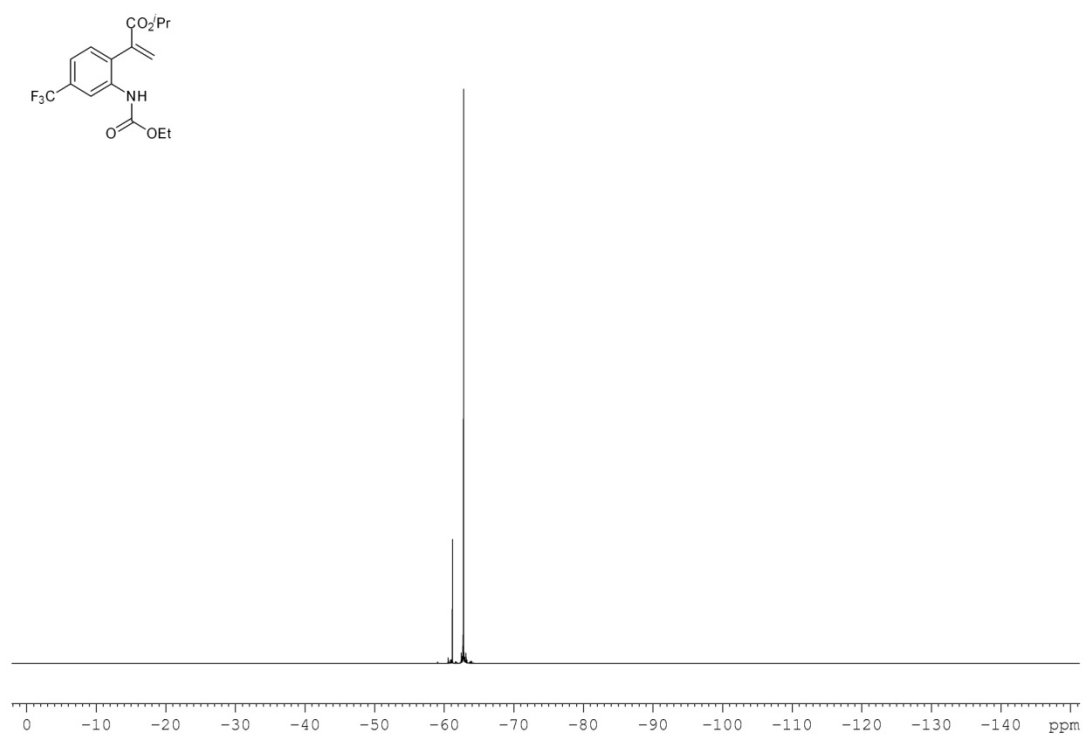

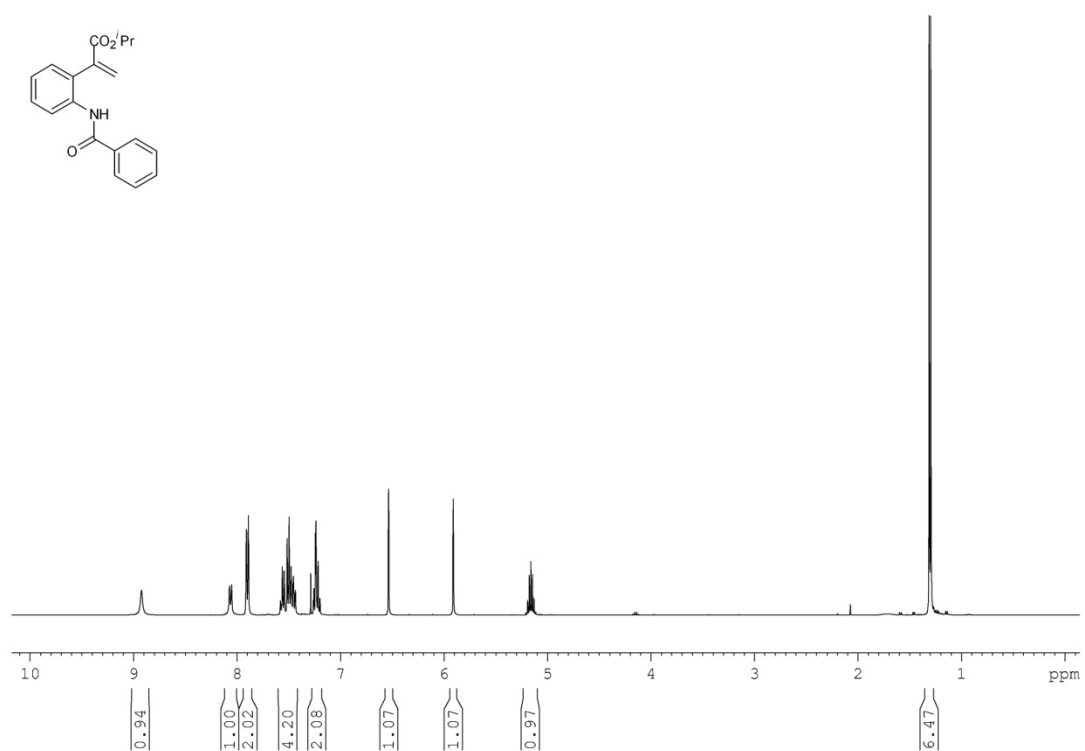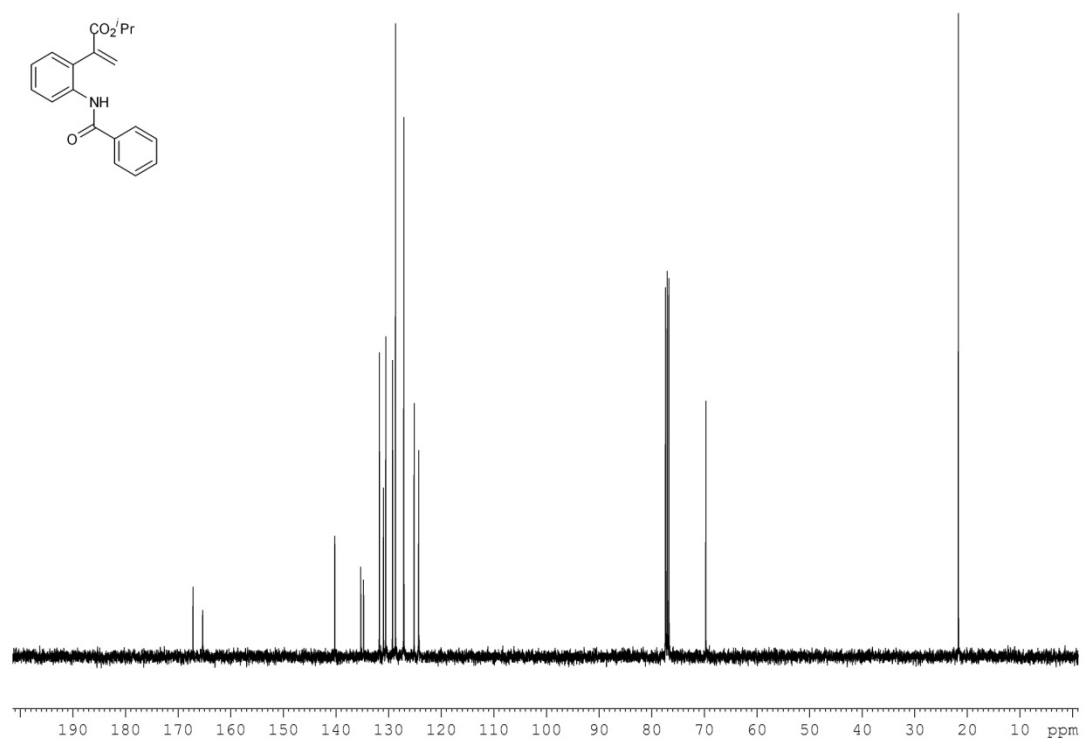

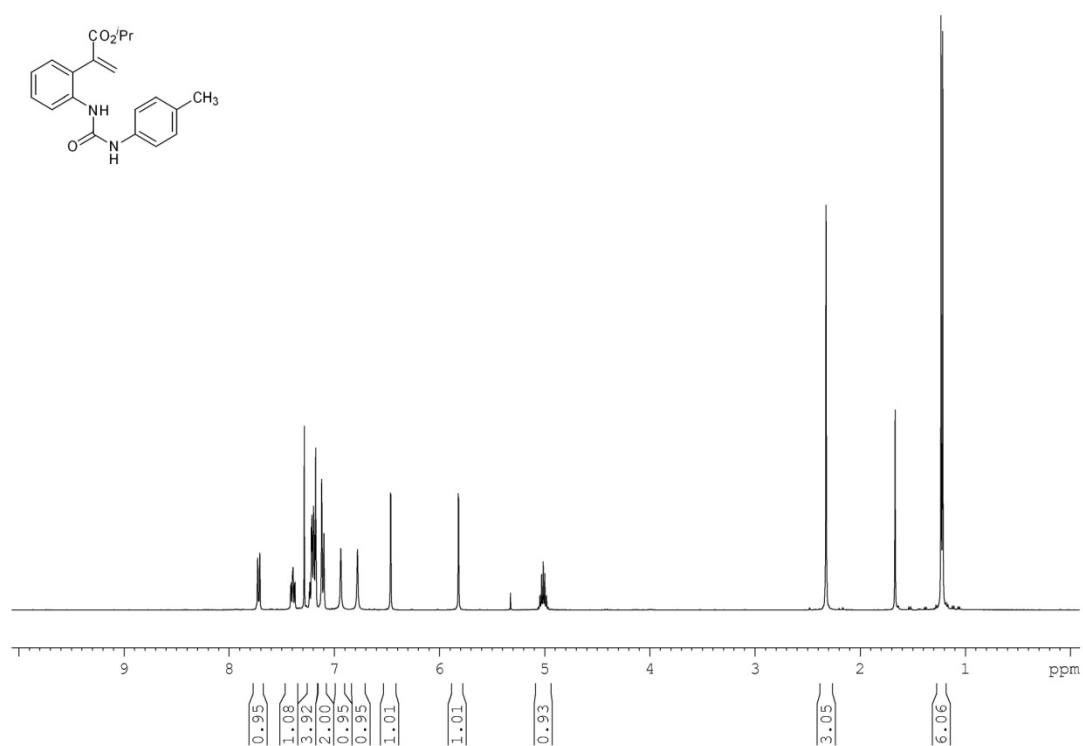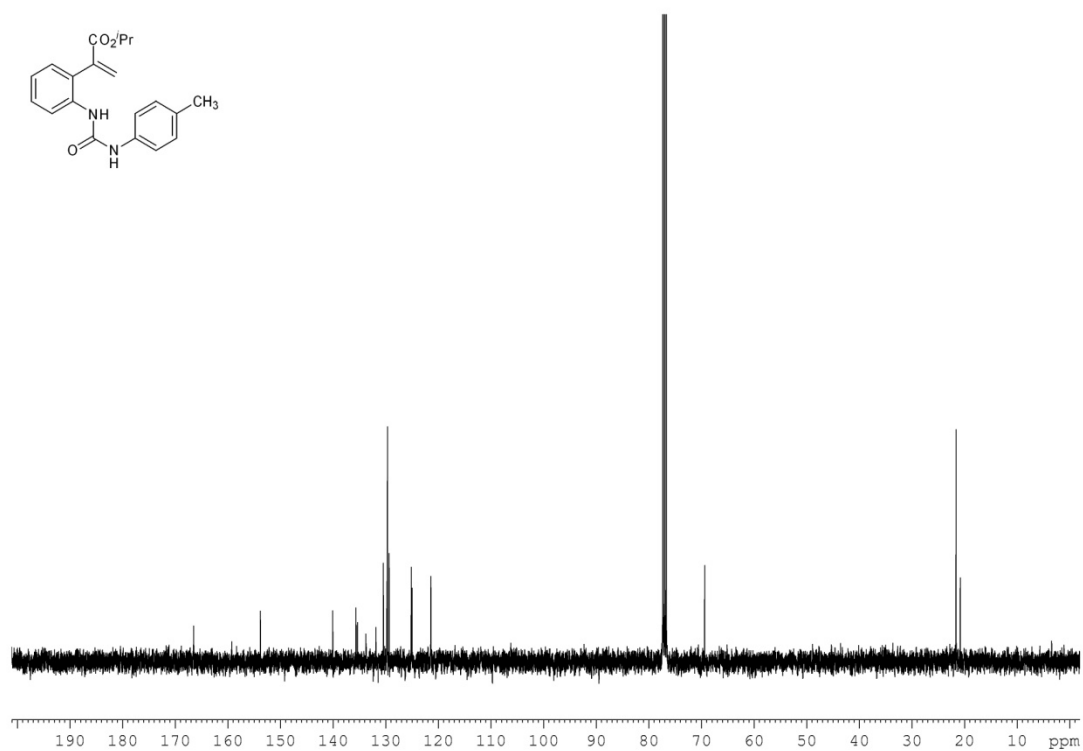

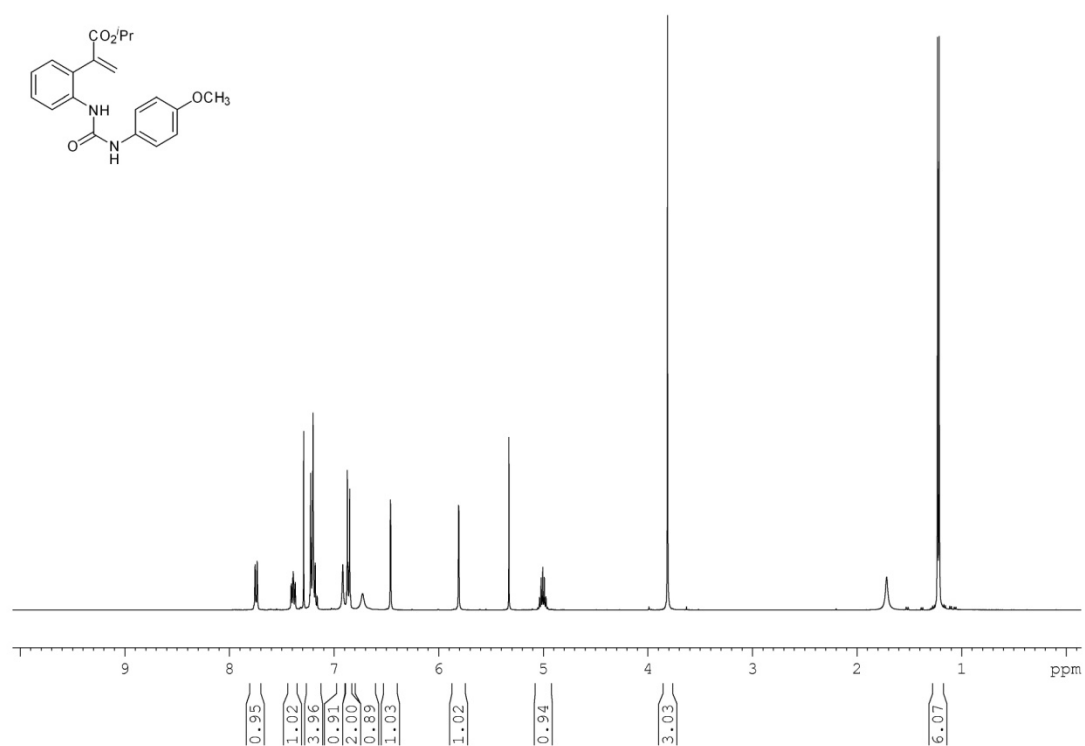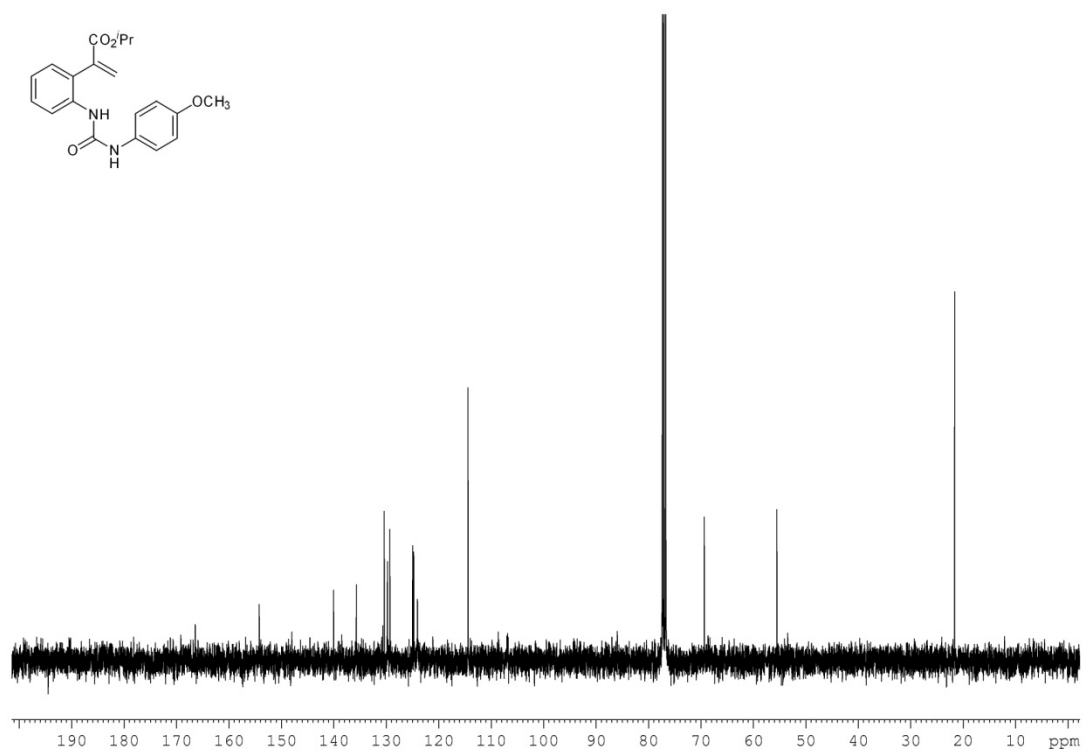

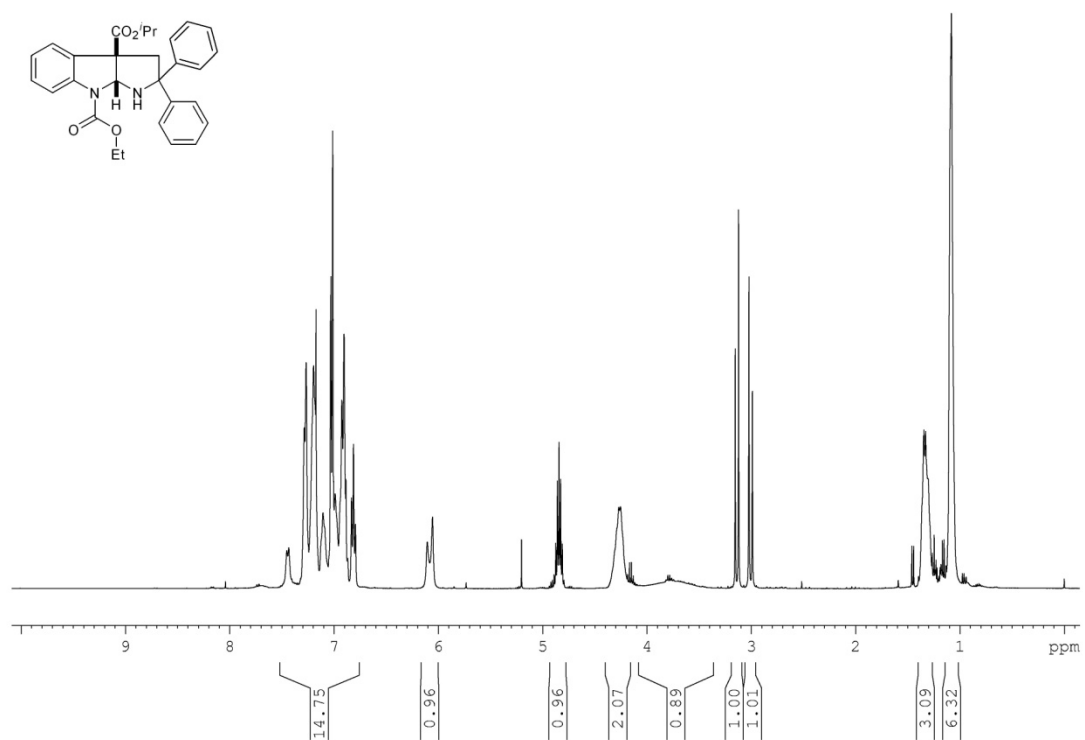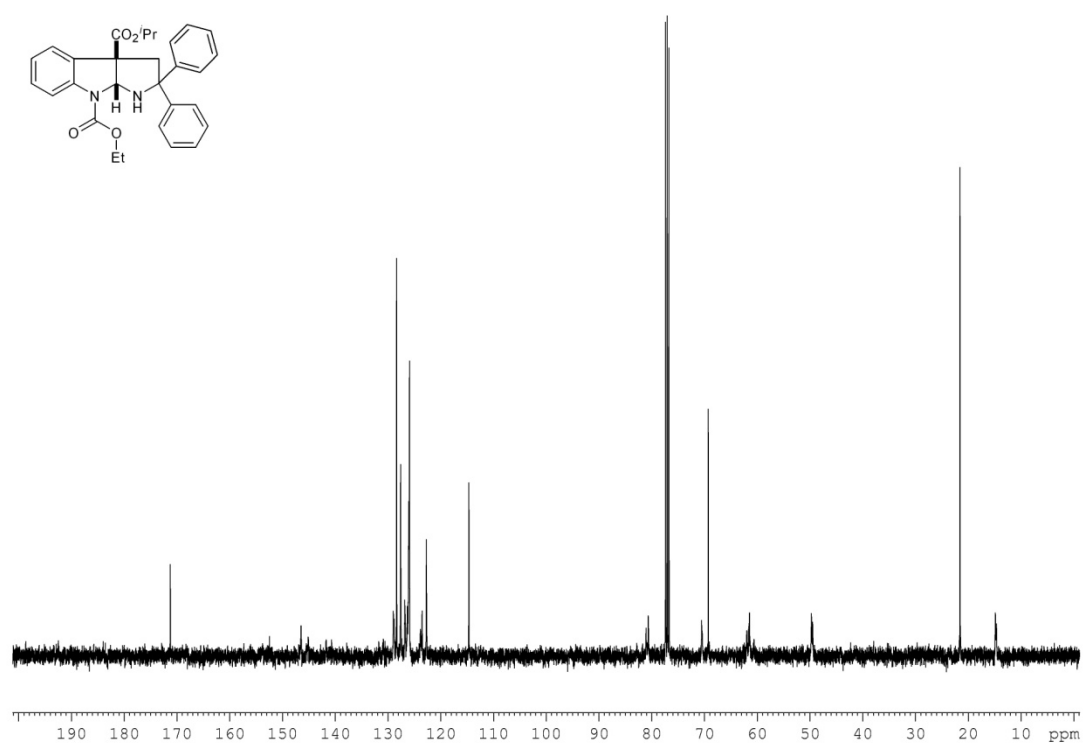

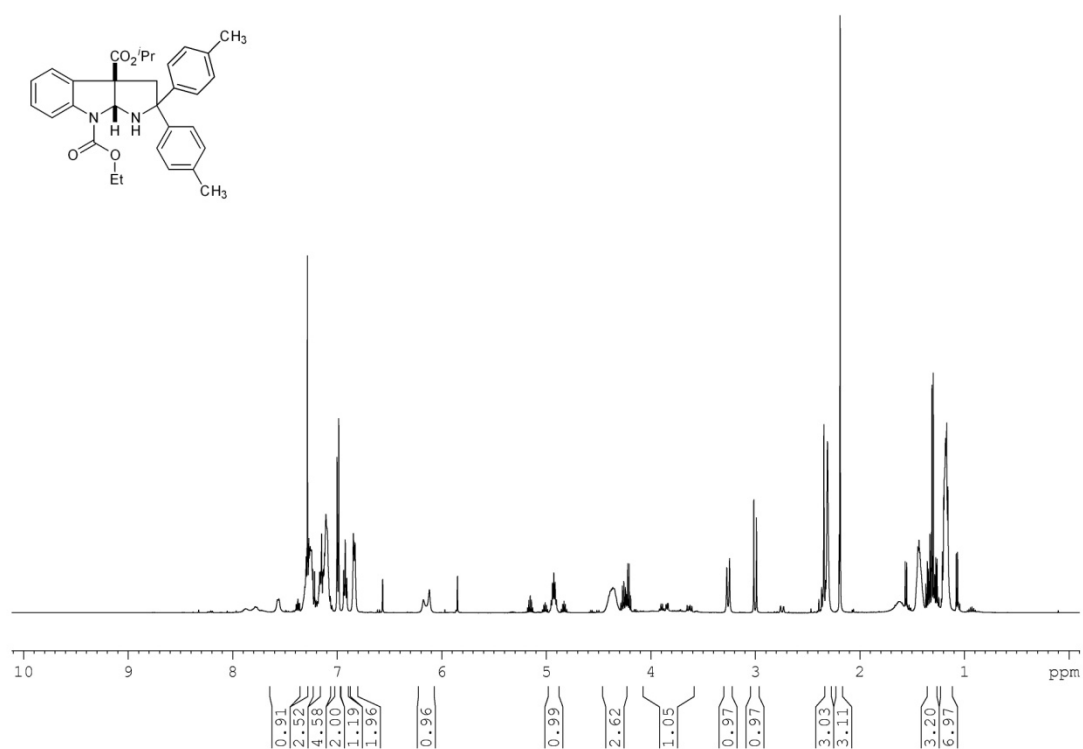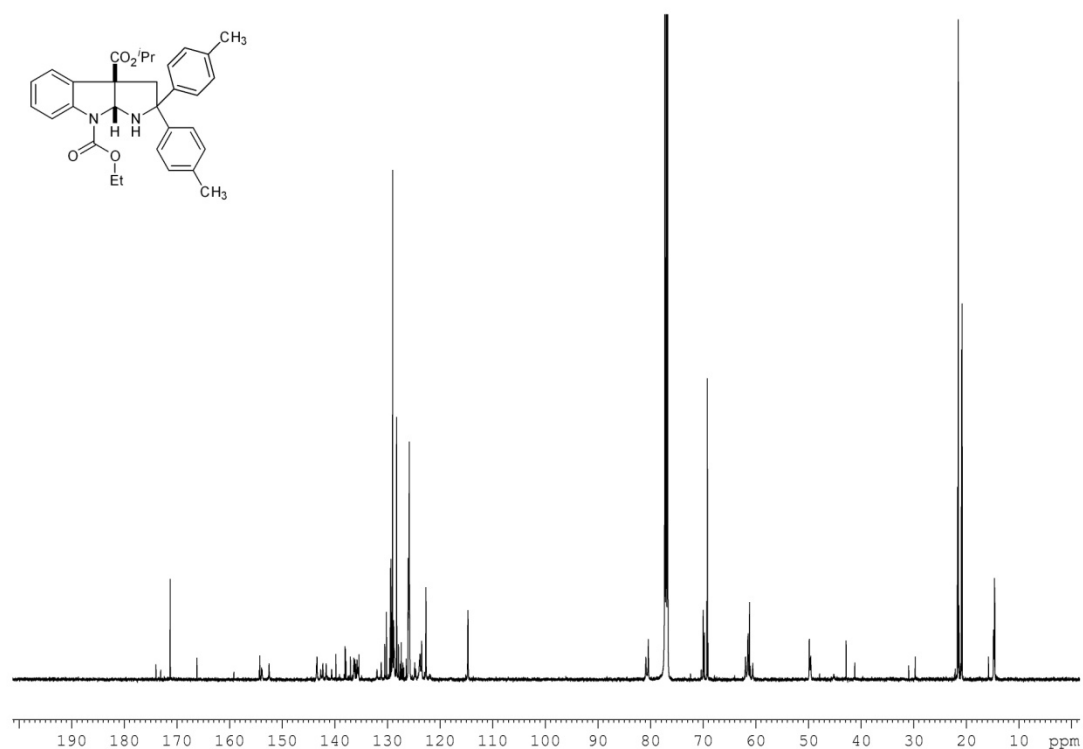

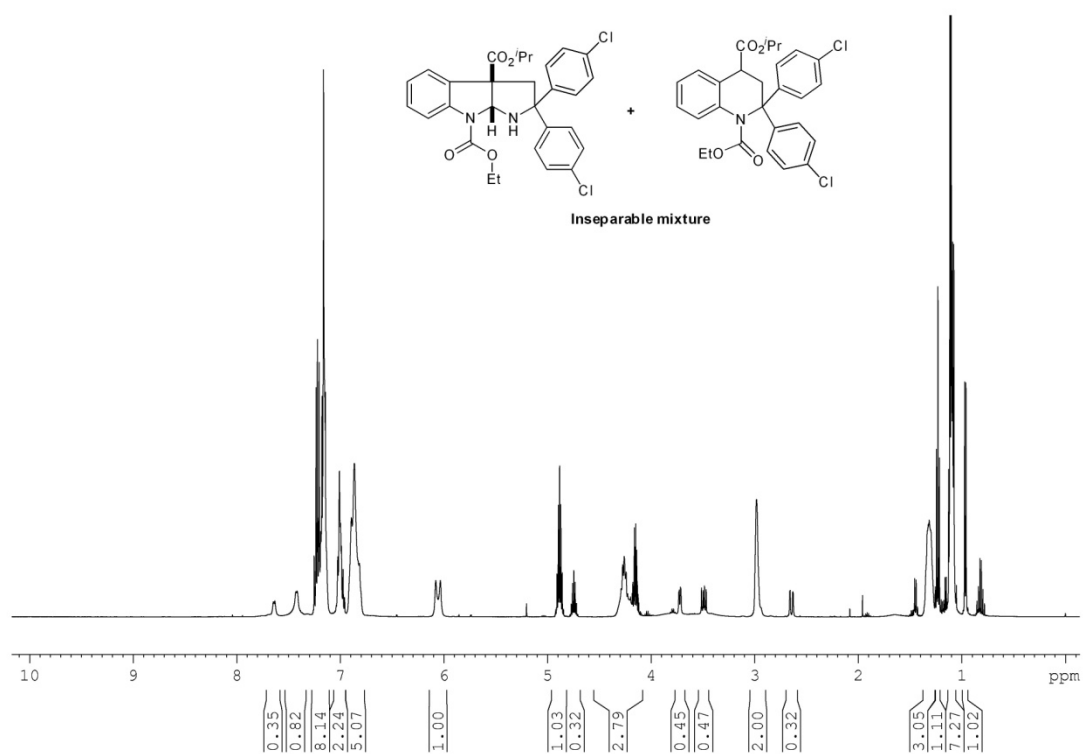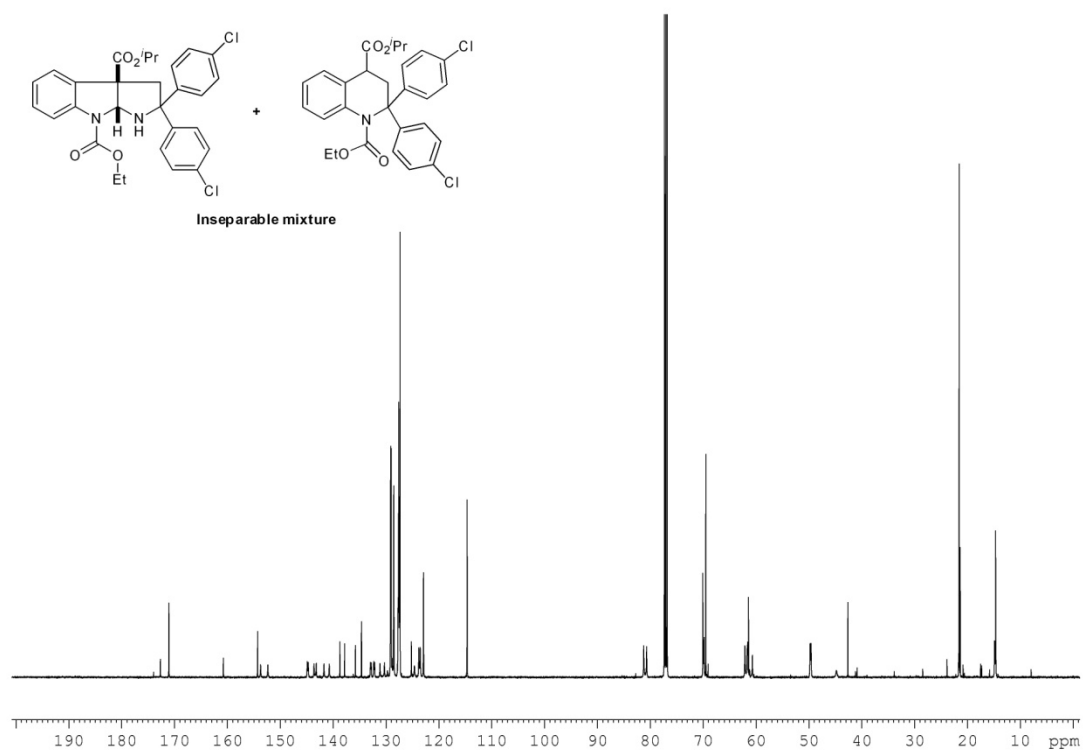



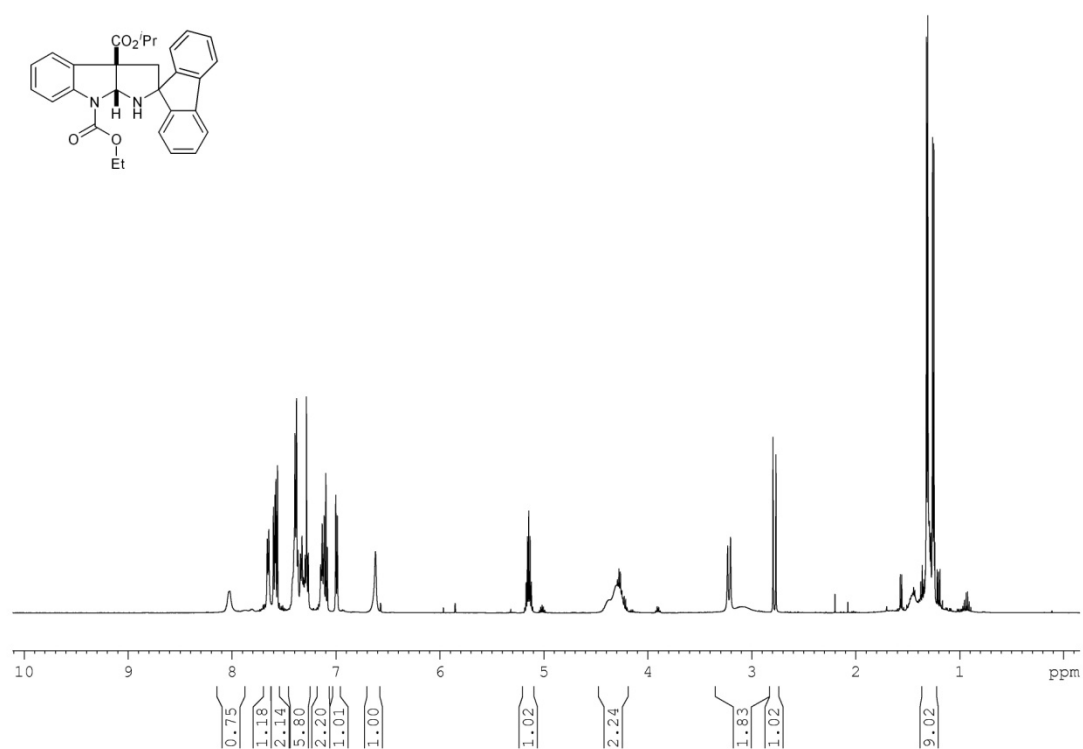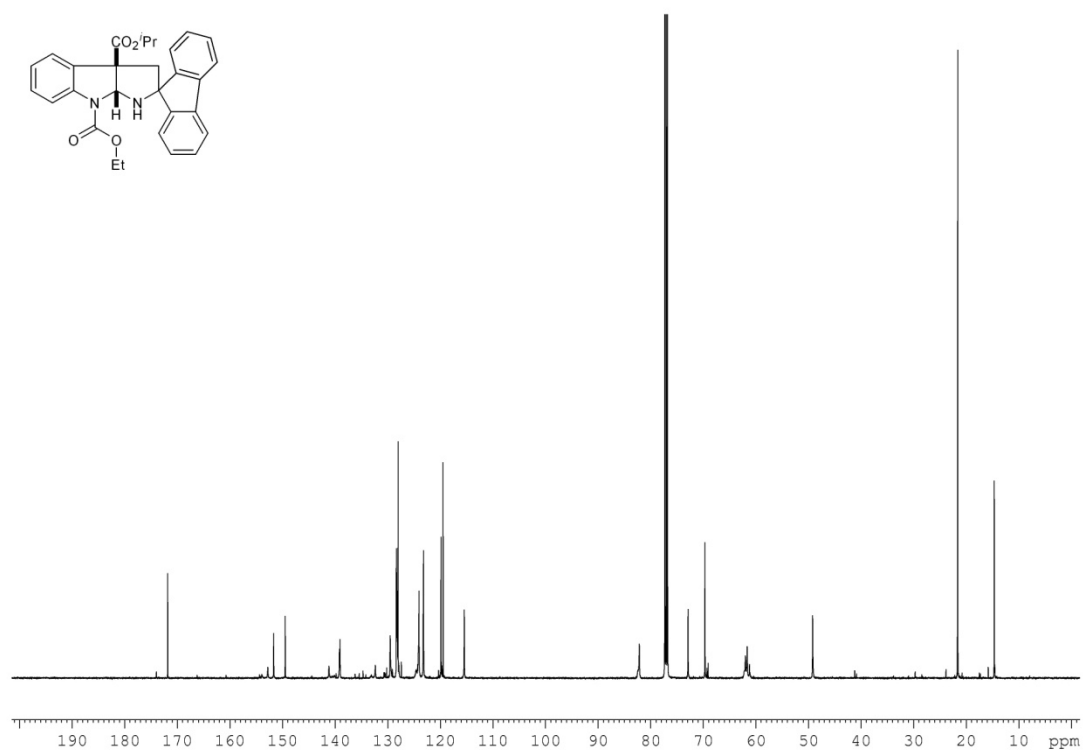

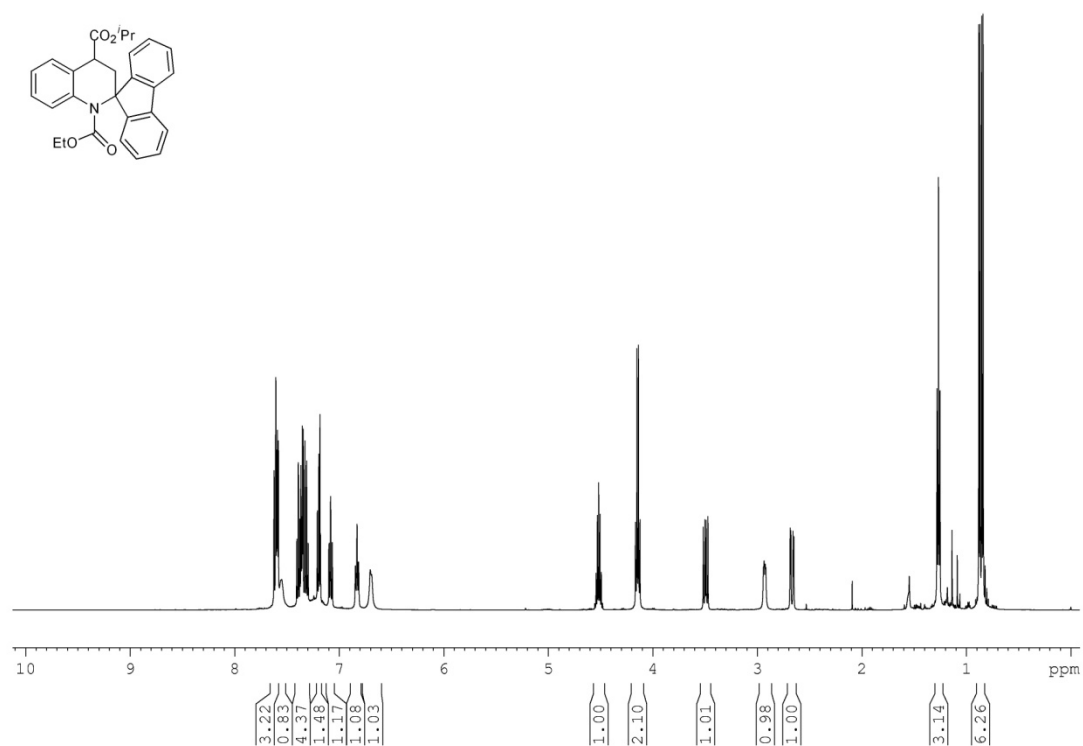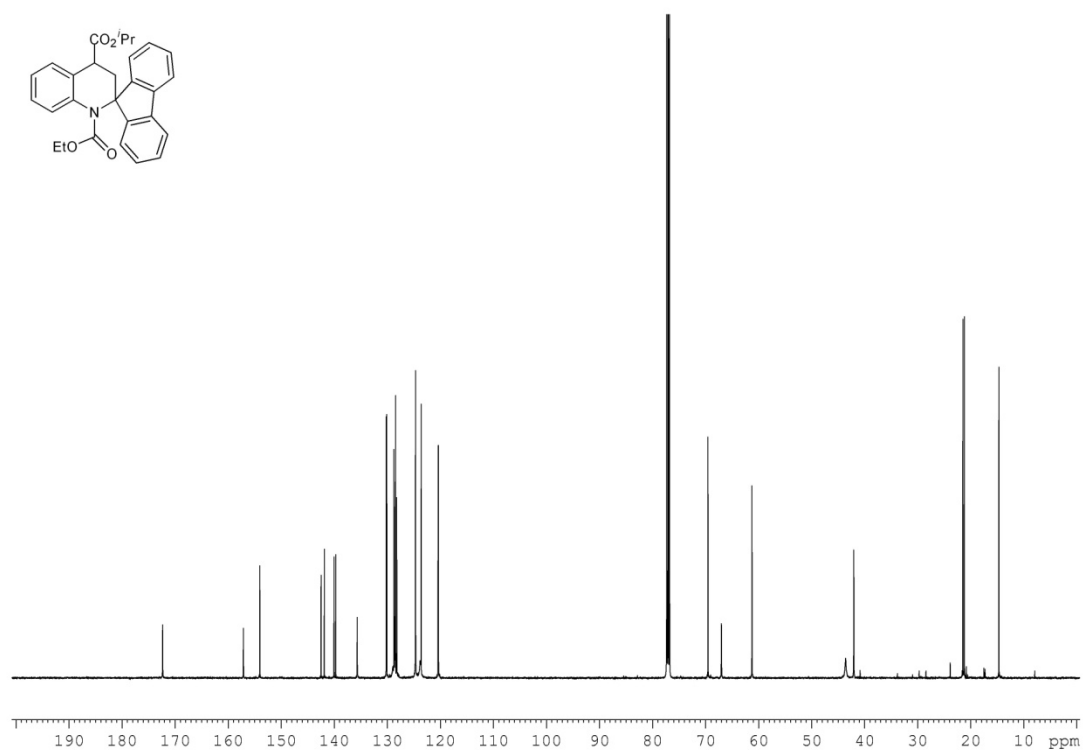

DRX500 1H acquisition, BBO probe KEISHI KOHARA 34756 MDS 24/7/2013 TEMP = 363k

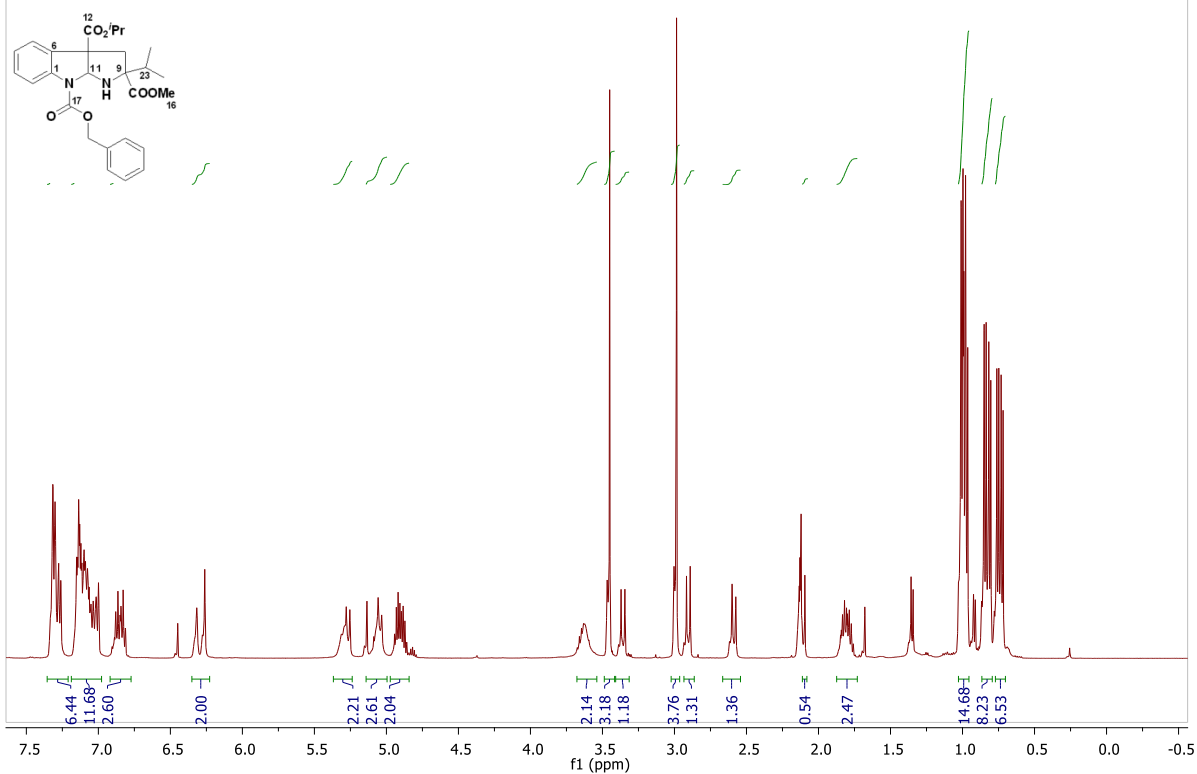

Group MDS KEISHI KOHARA 34756 18/7/13

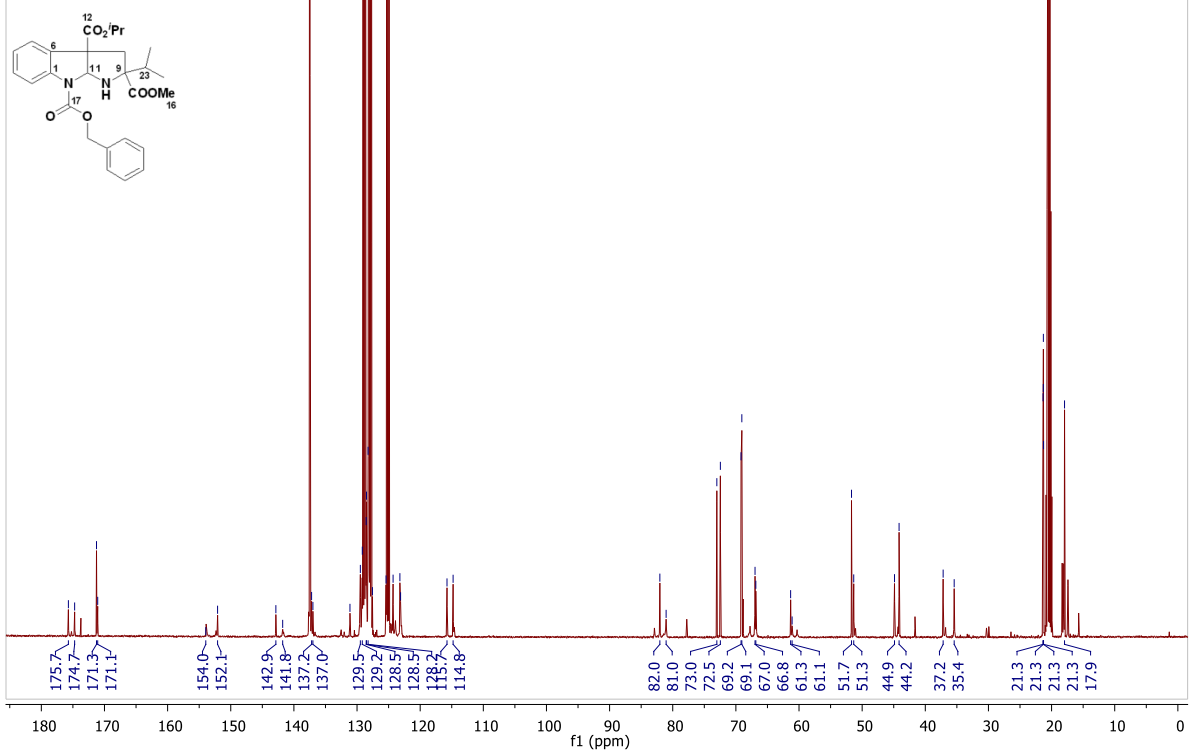

mg41243005

DRX500 1H acquisition, BBO probe MATIYA GREDICK 34123 30/5/13 TEMP = 363K

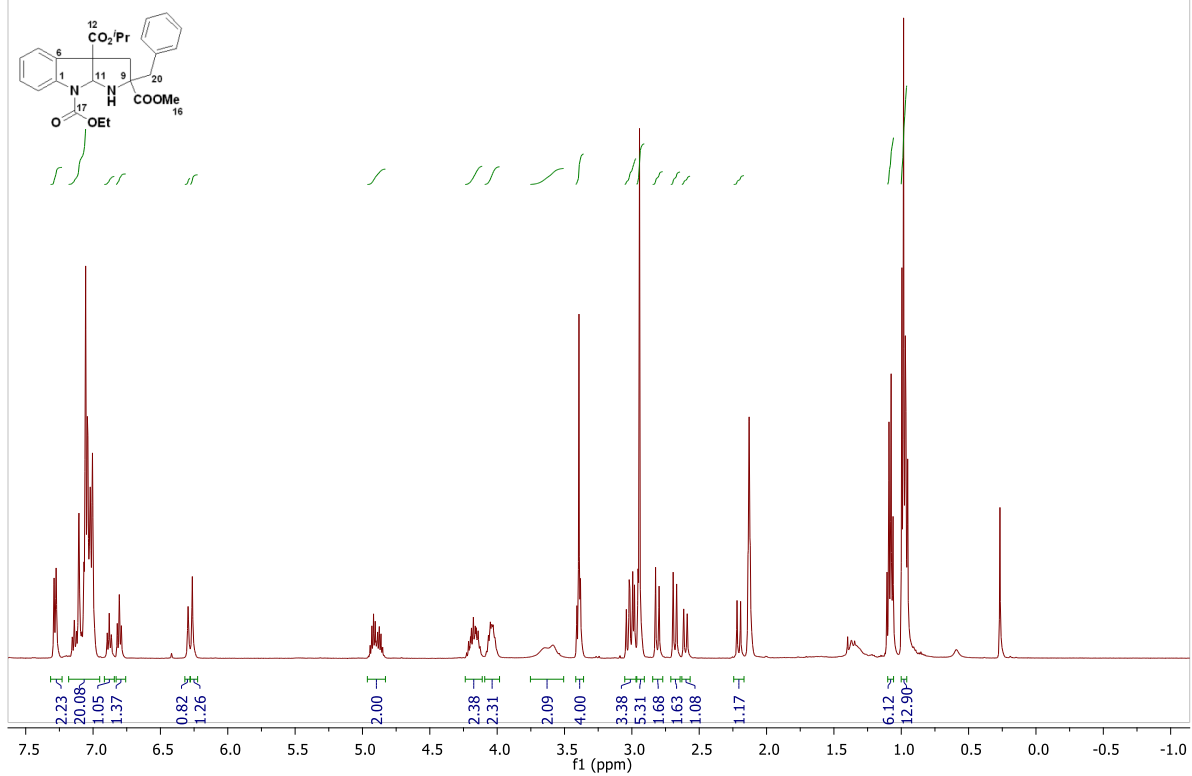

mg41232905

DRX500 13C acquisition BBO probe MATIYA GREDICK 34123 29/5/13 TEMP = 363K

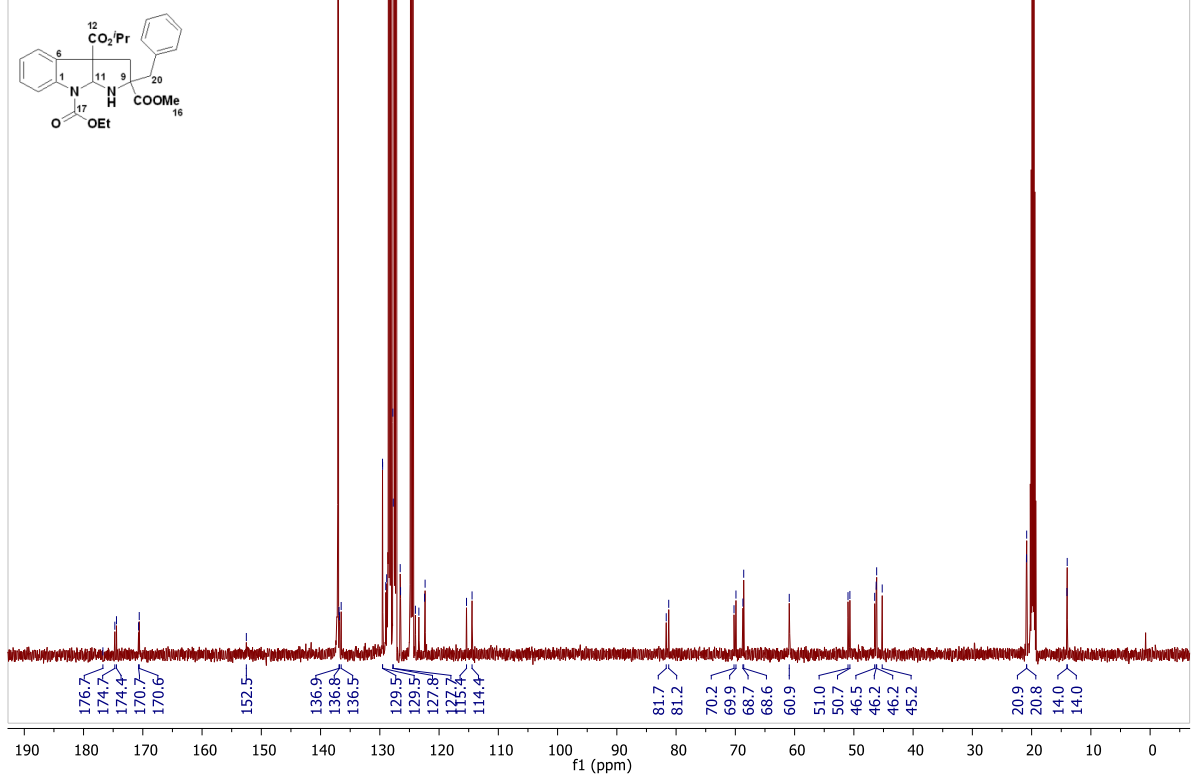

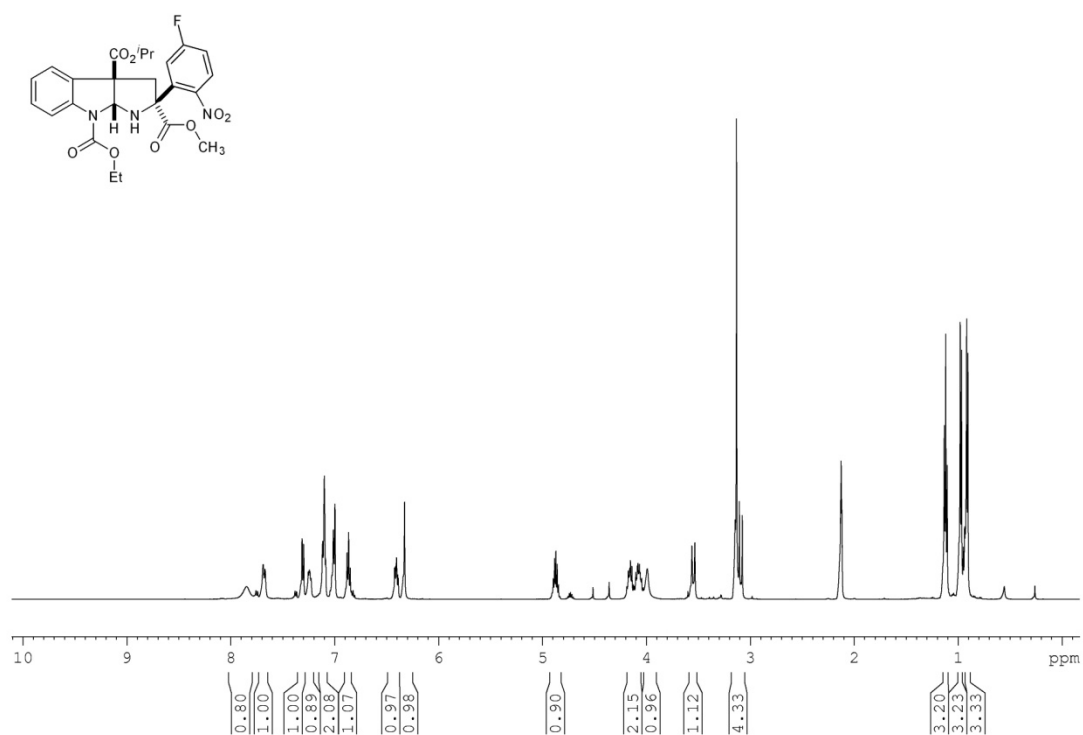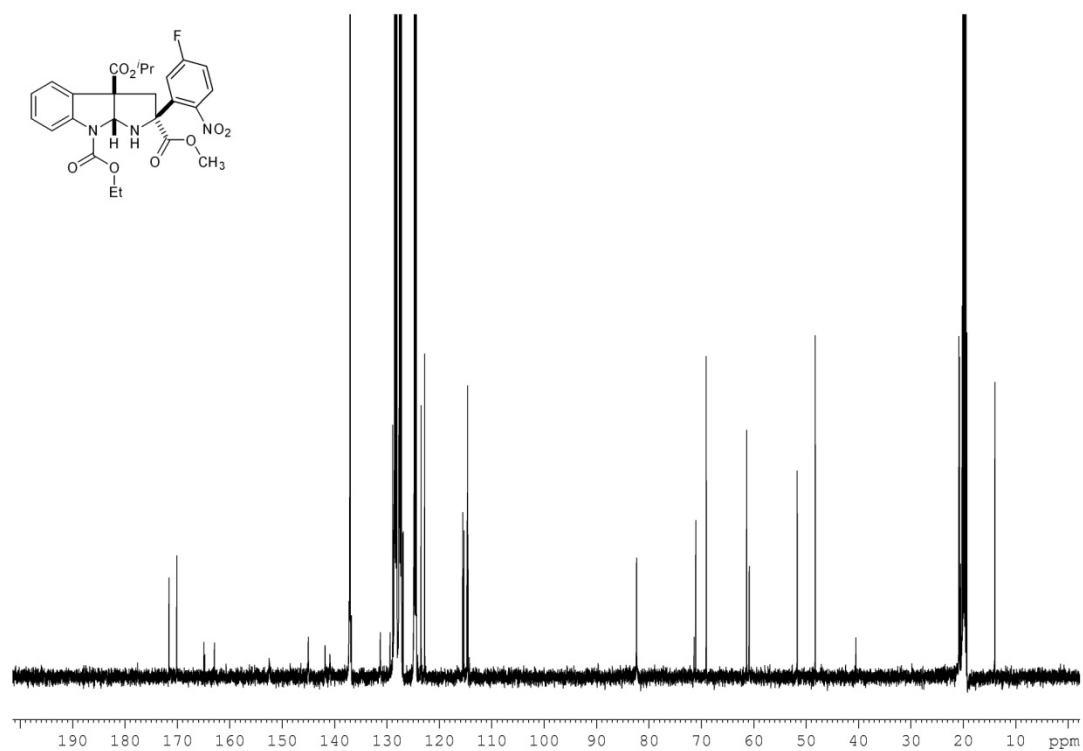

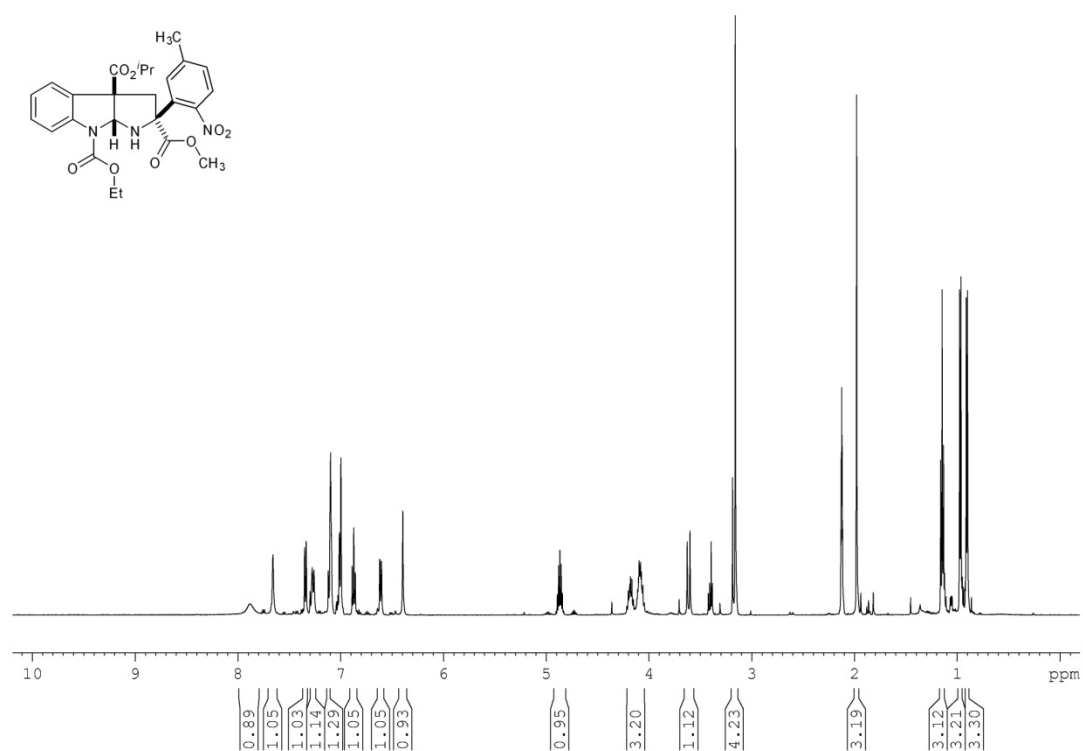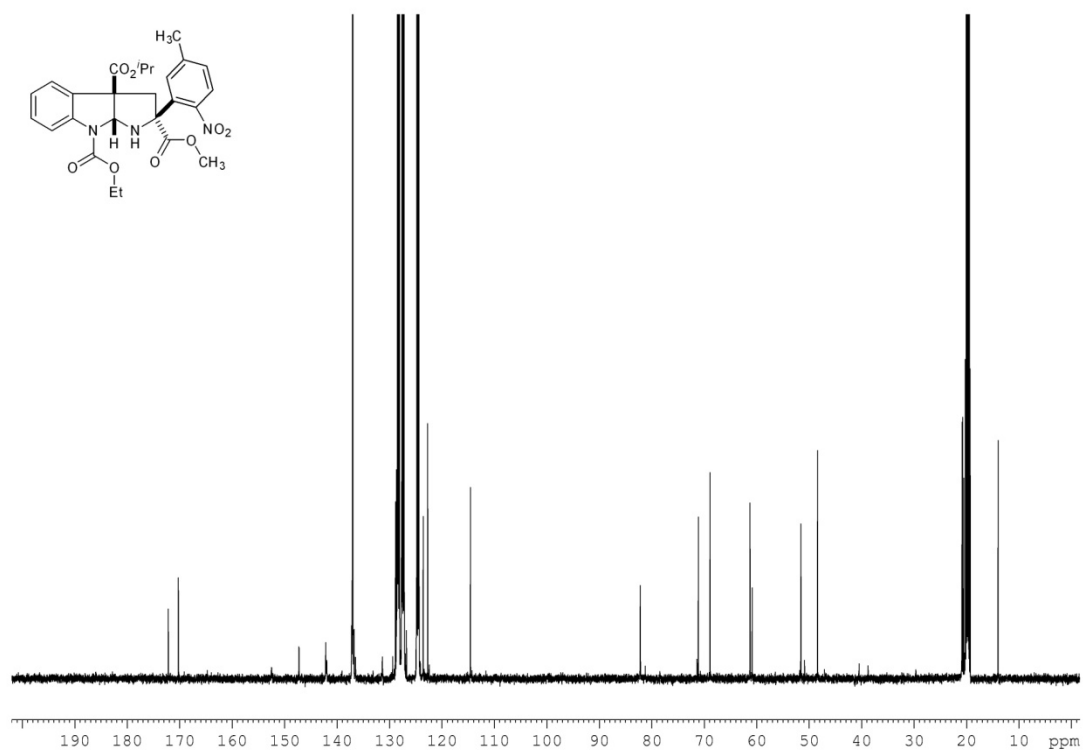

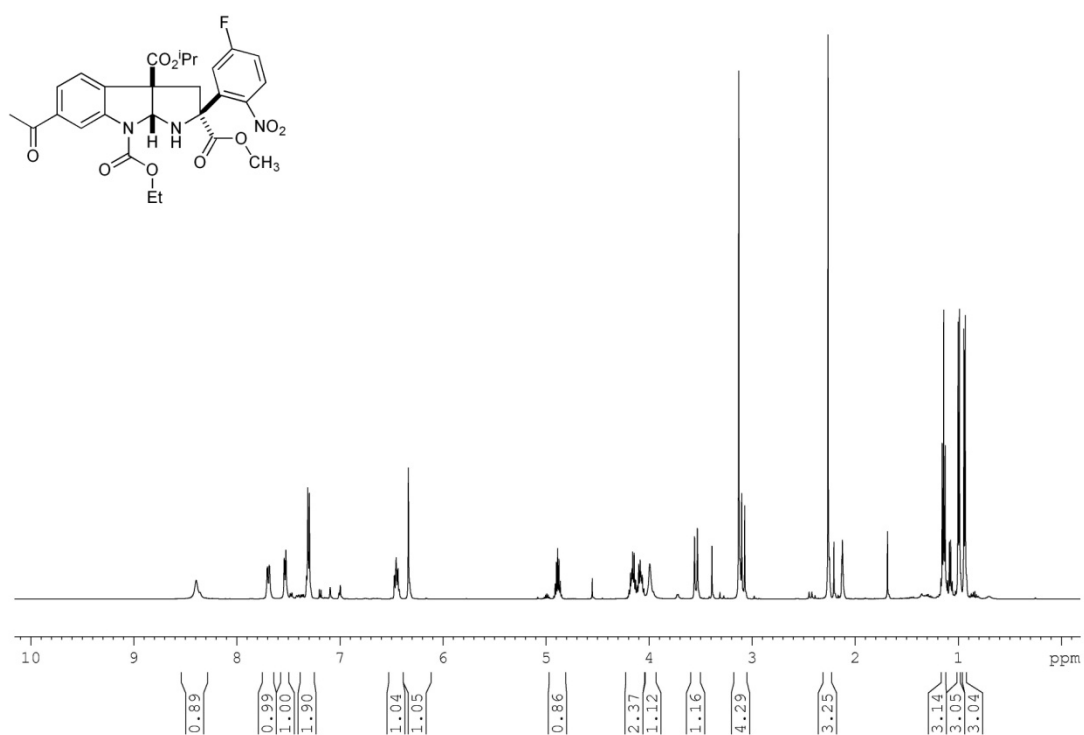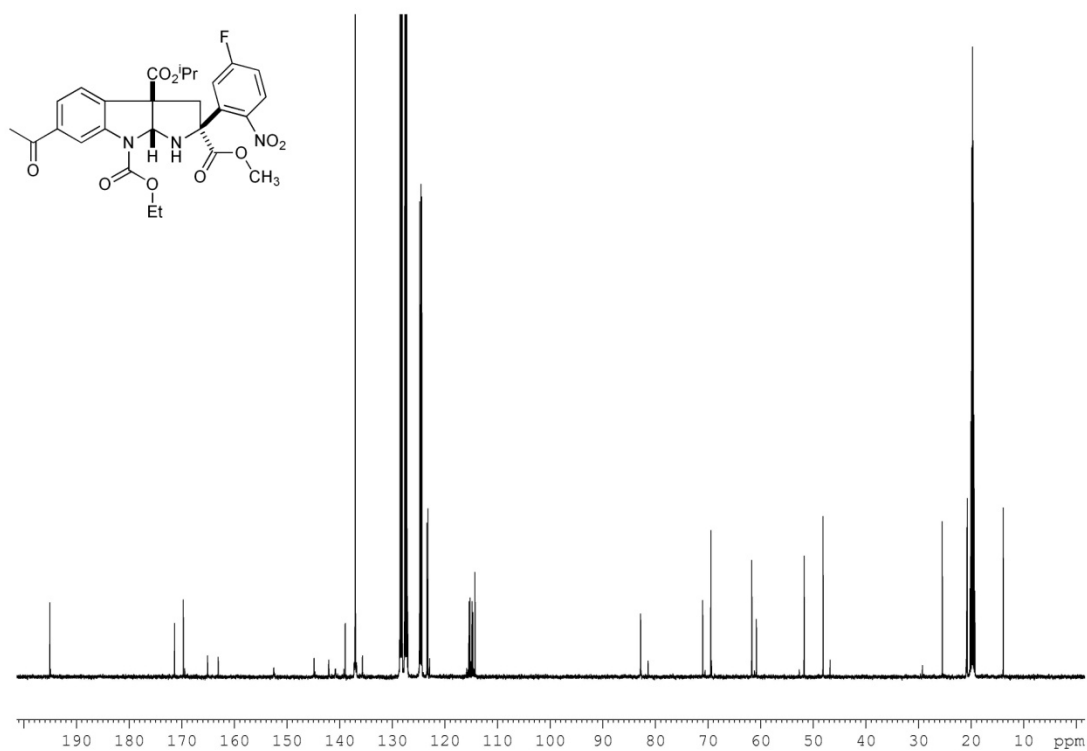

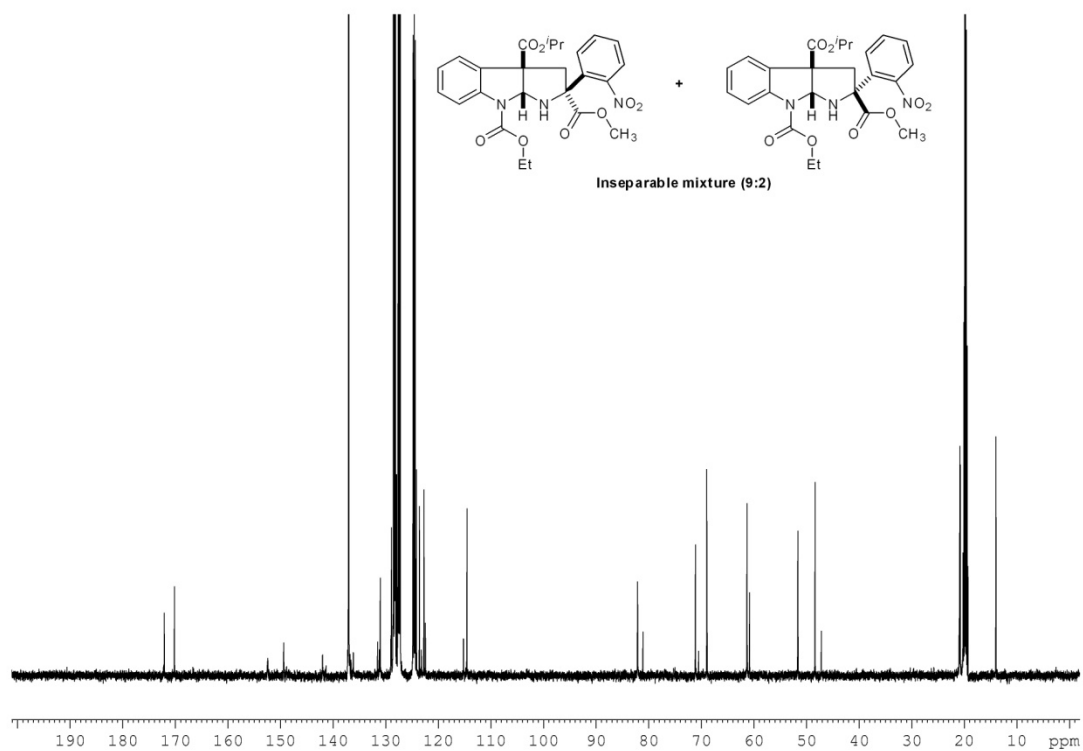



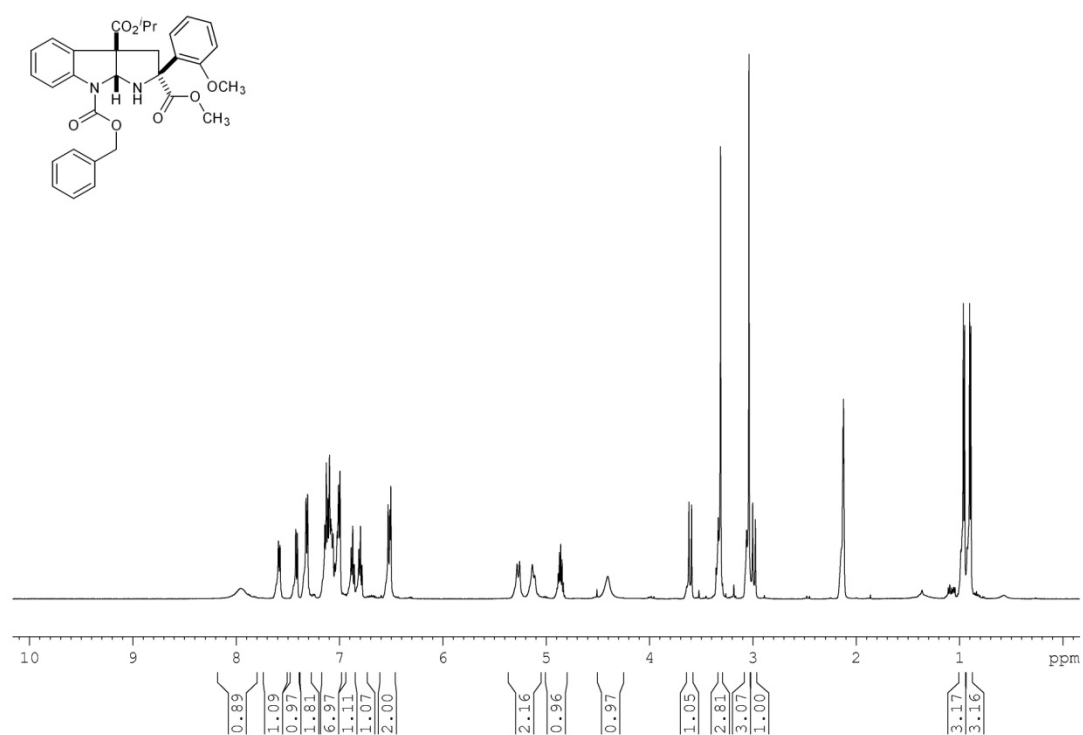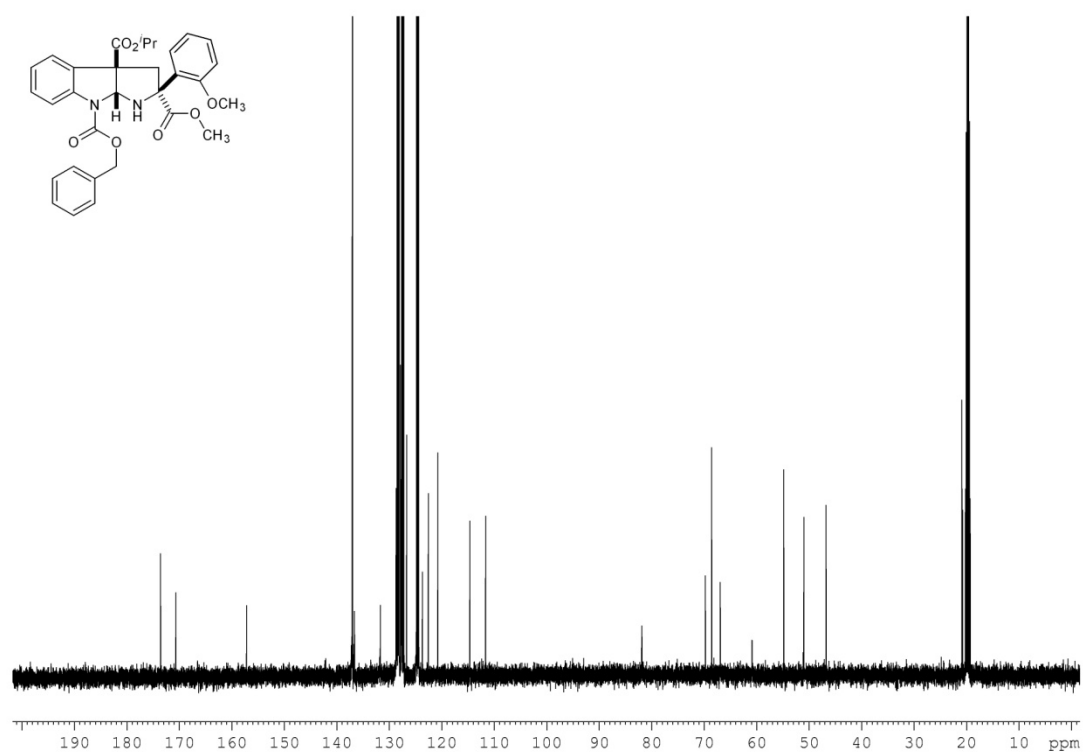

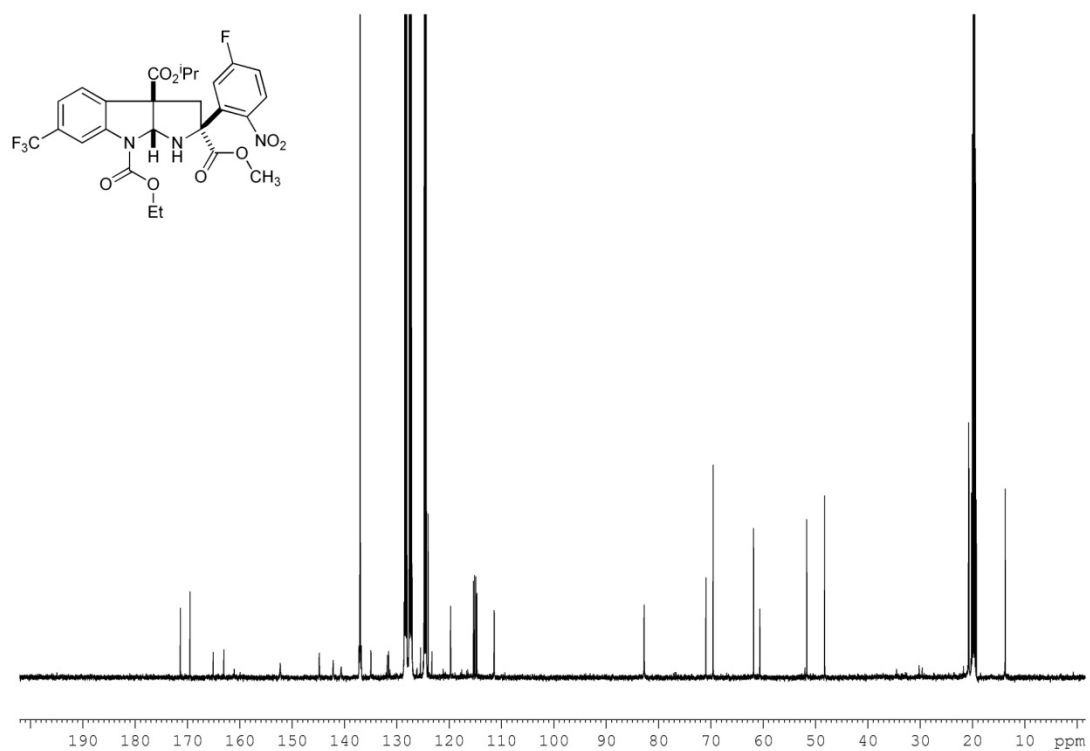

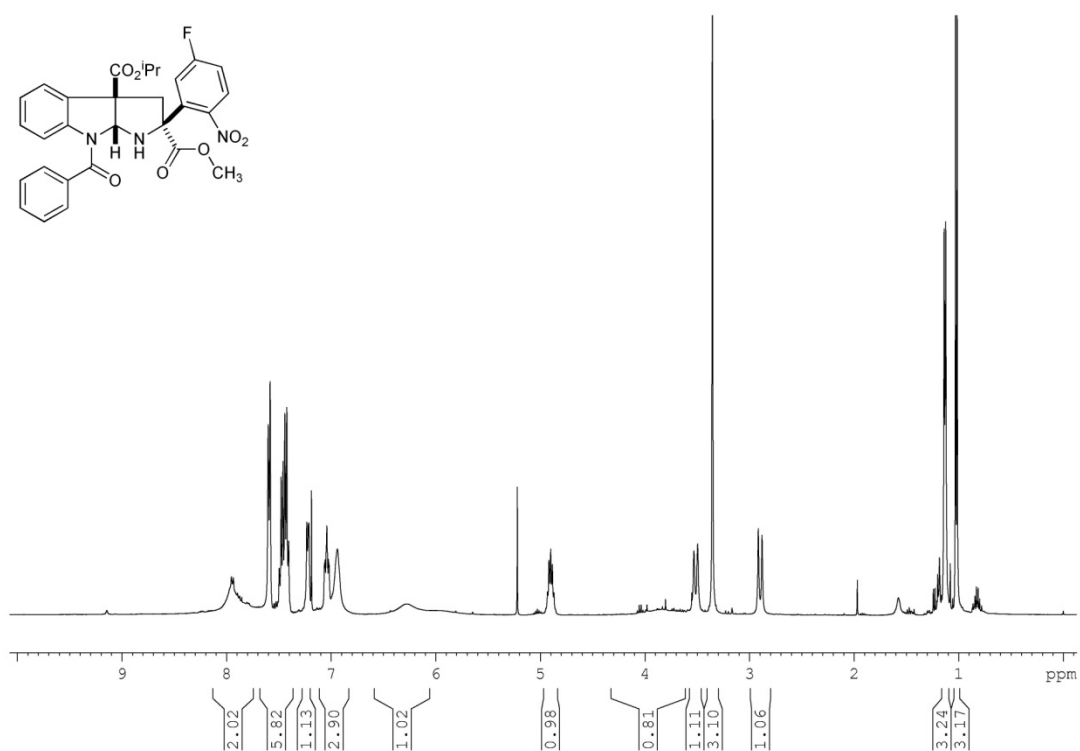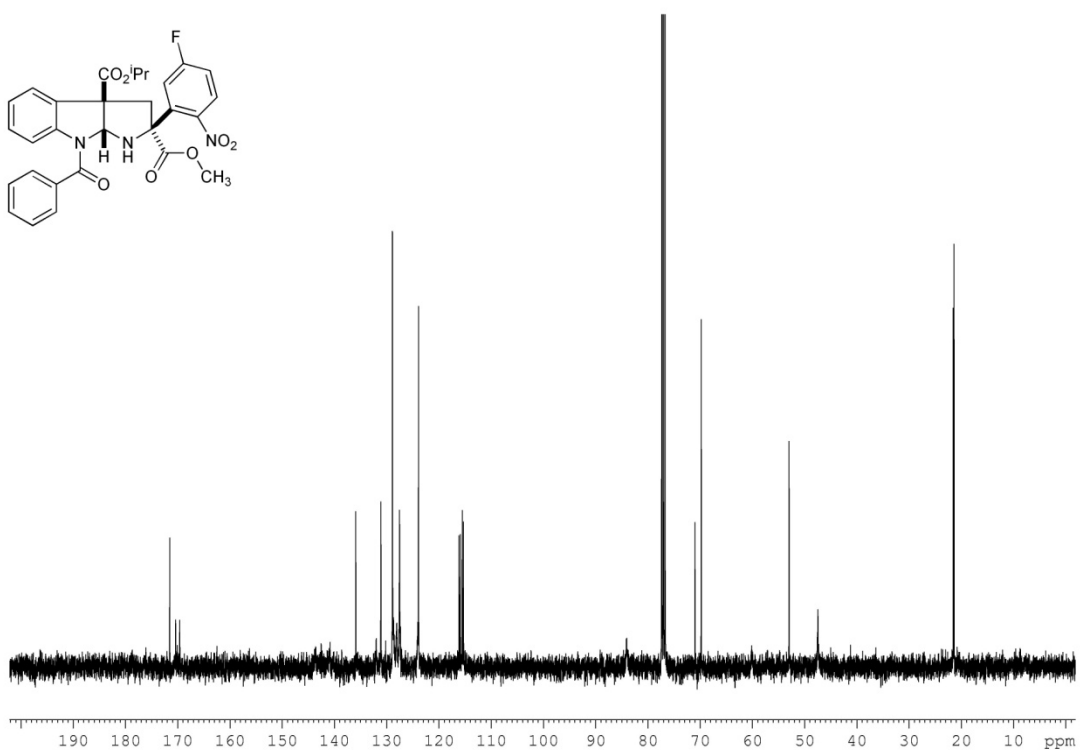

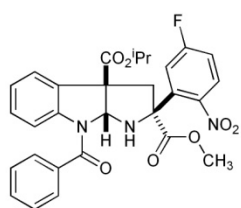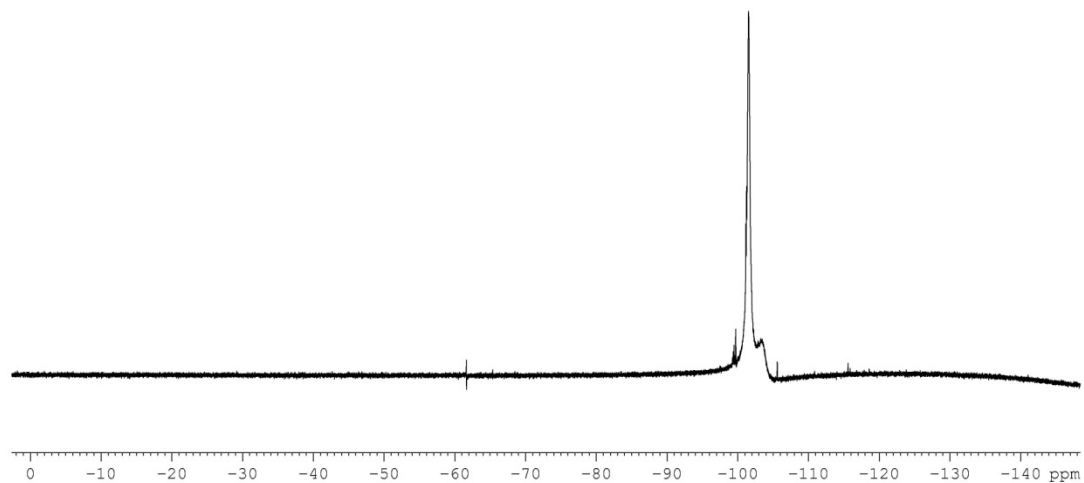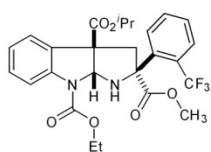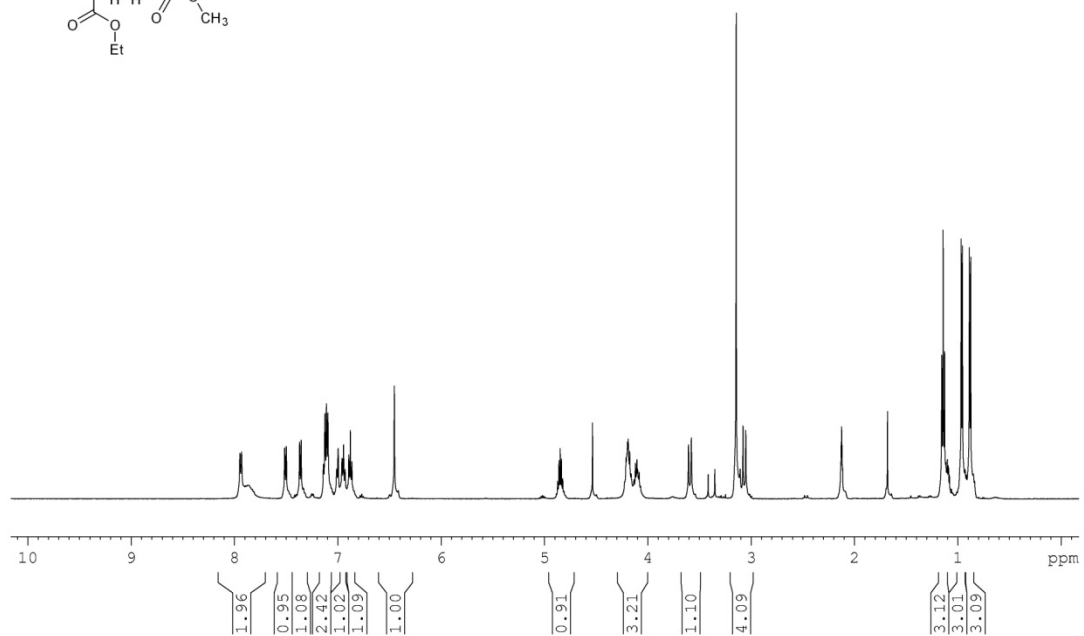

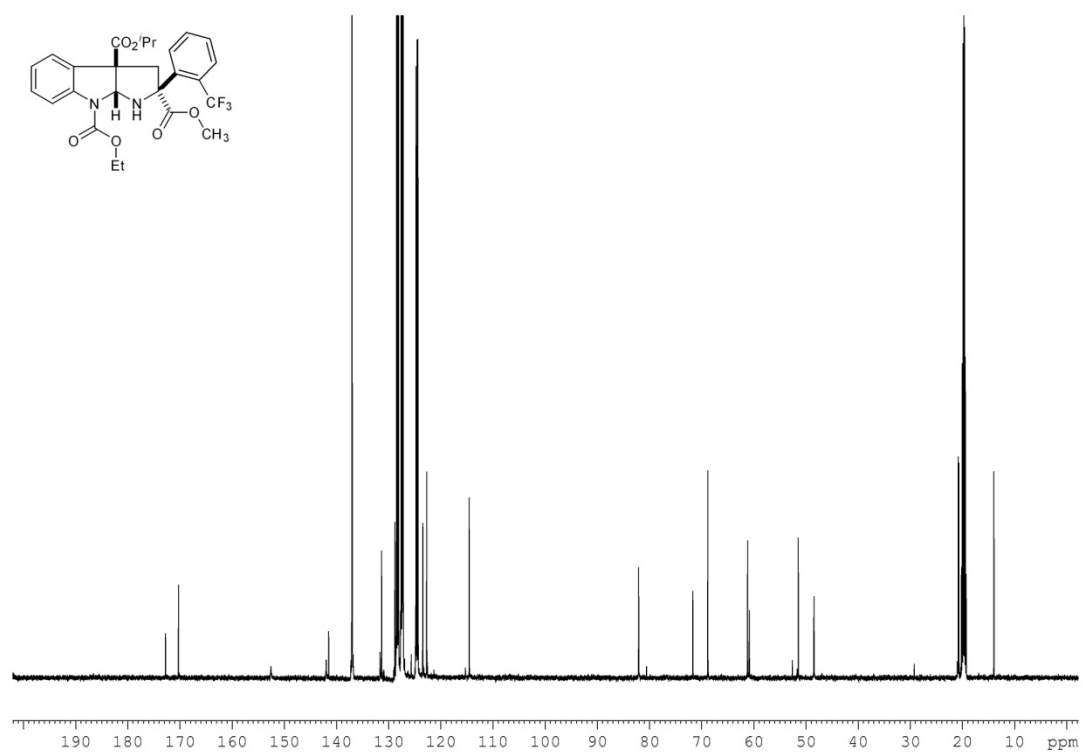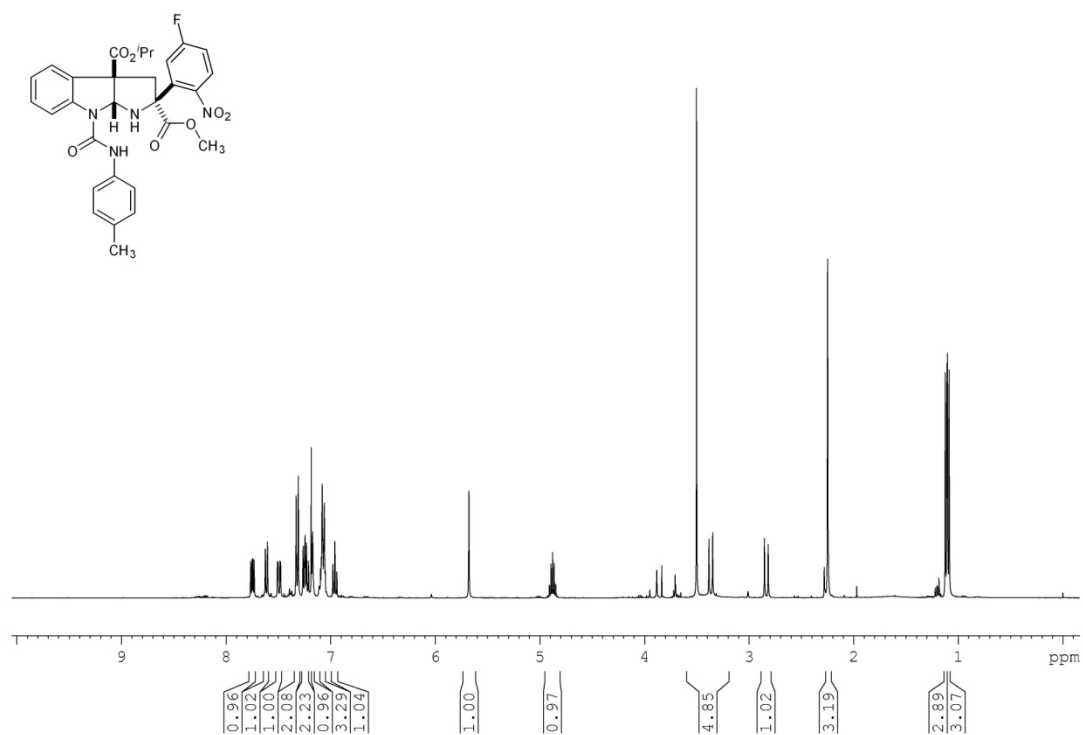

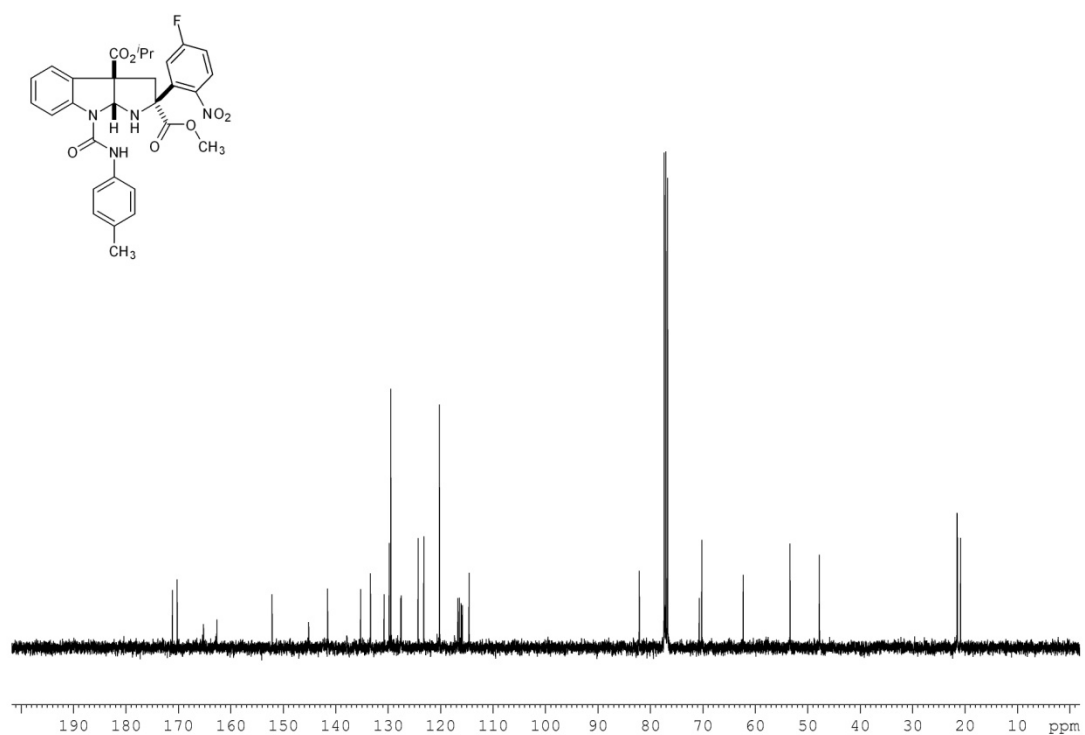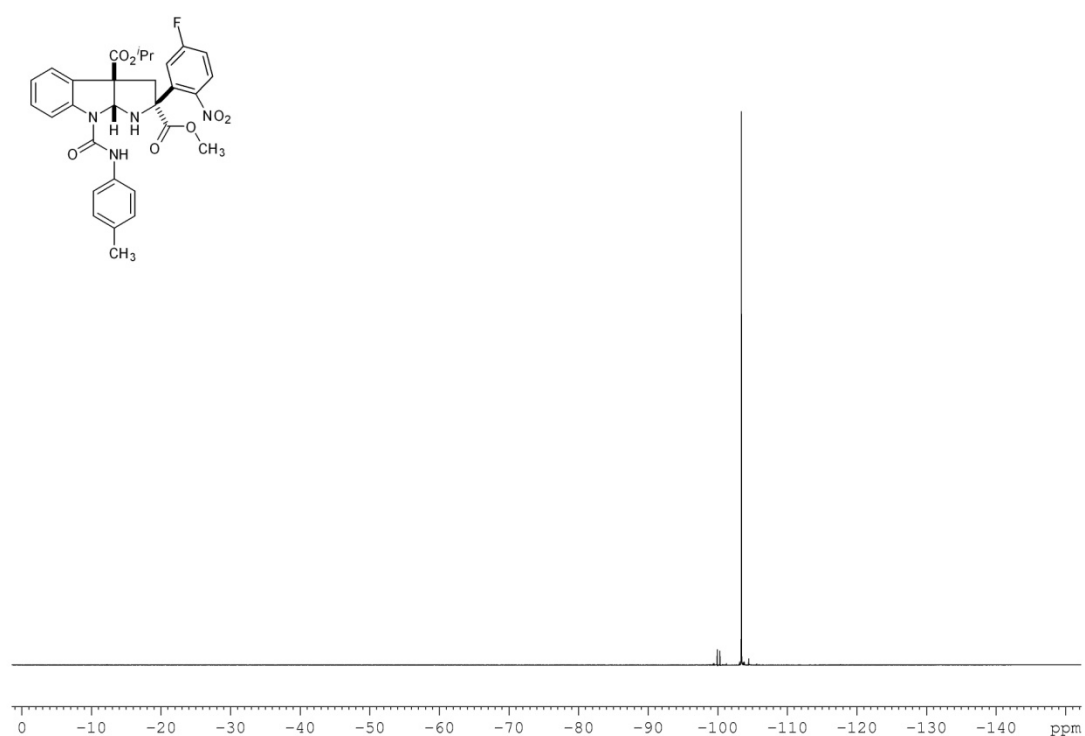

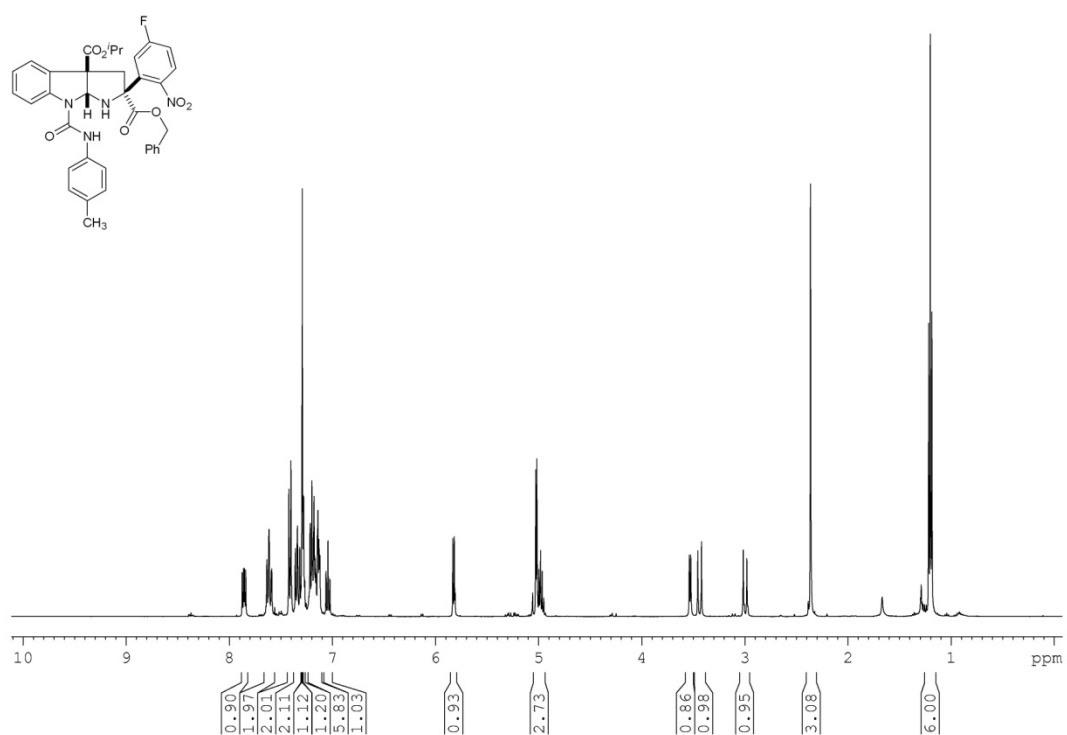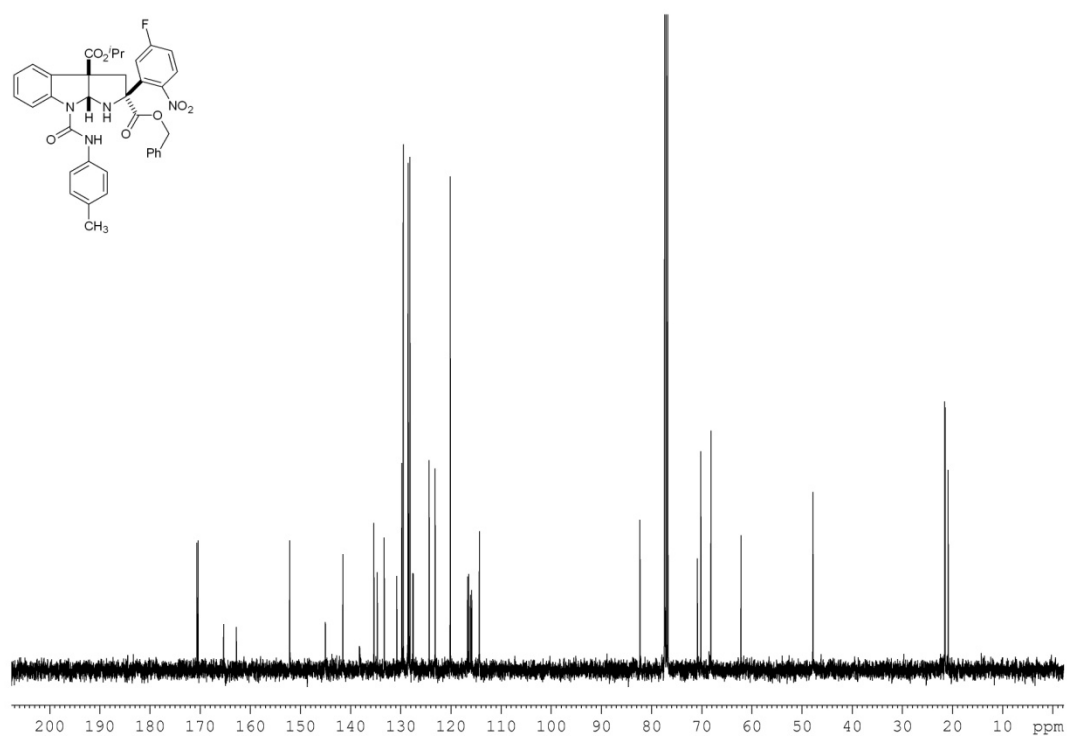

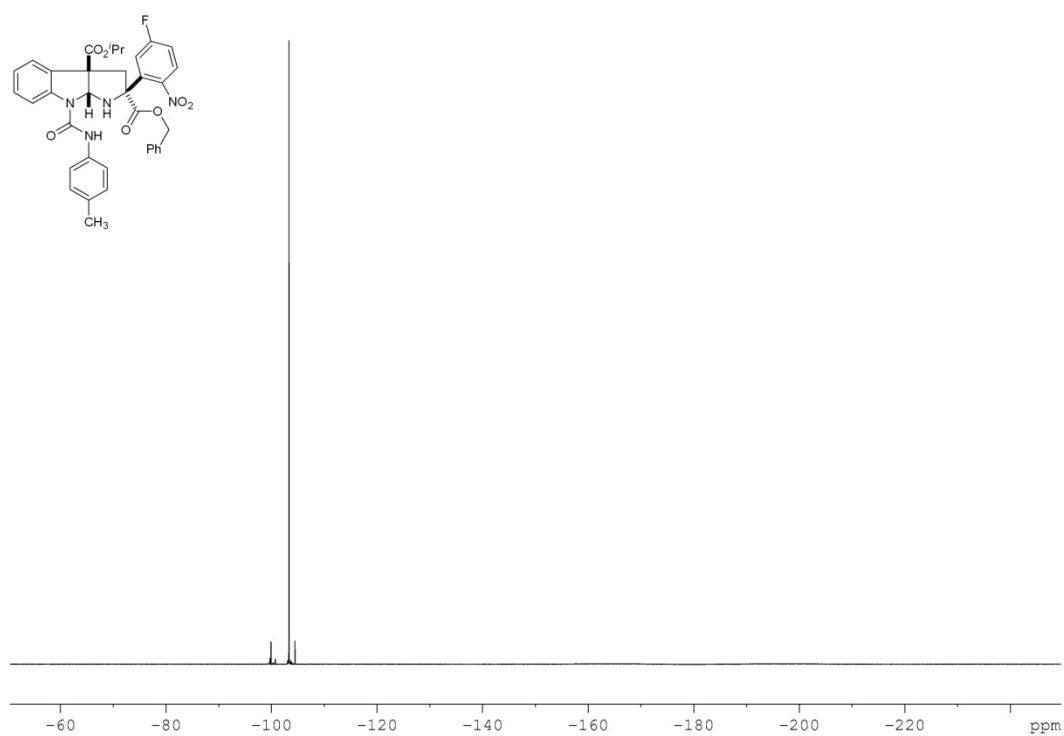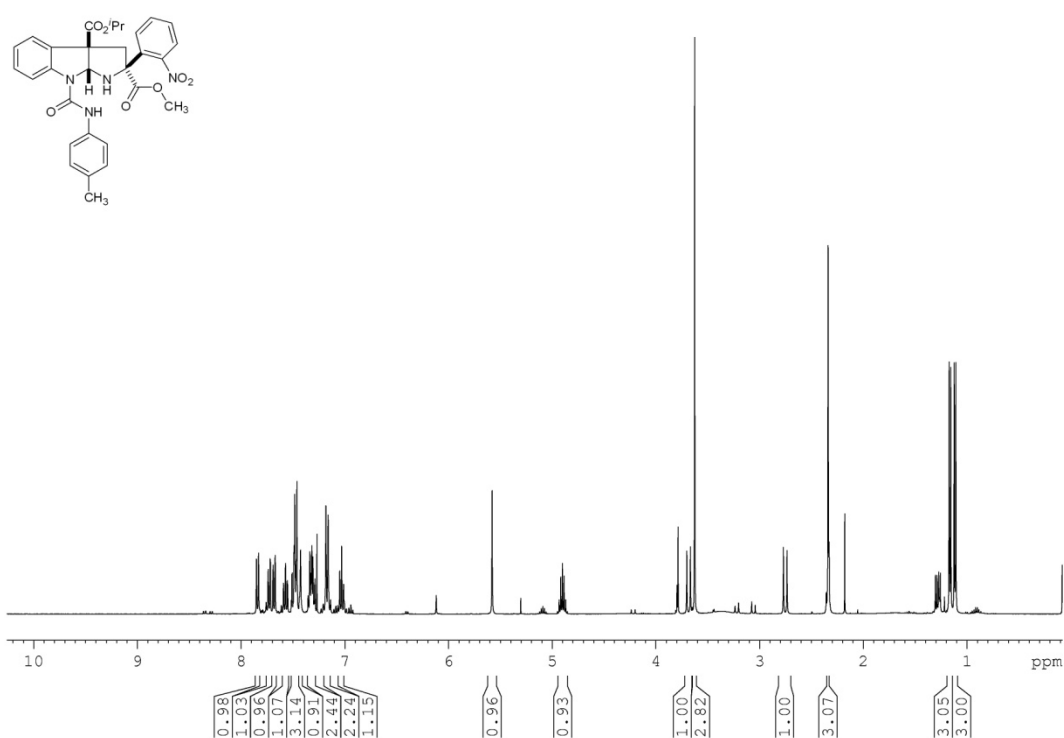



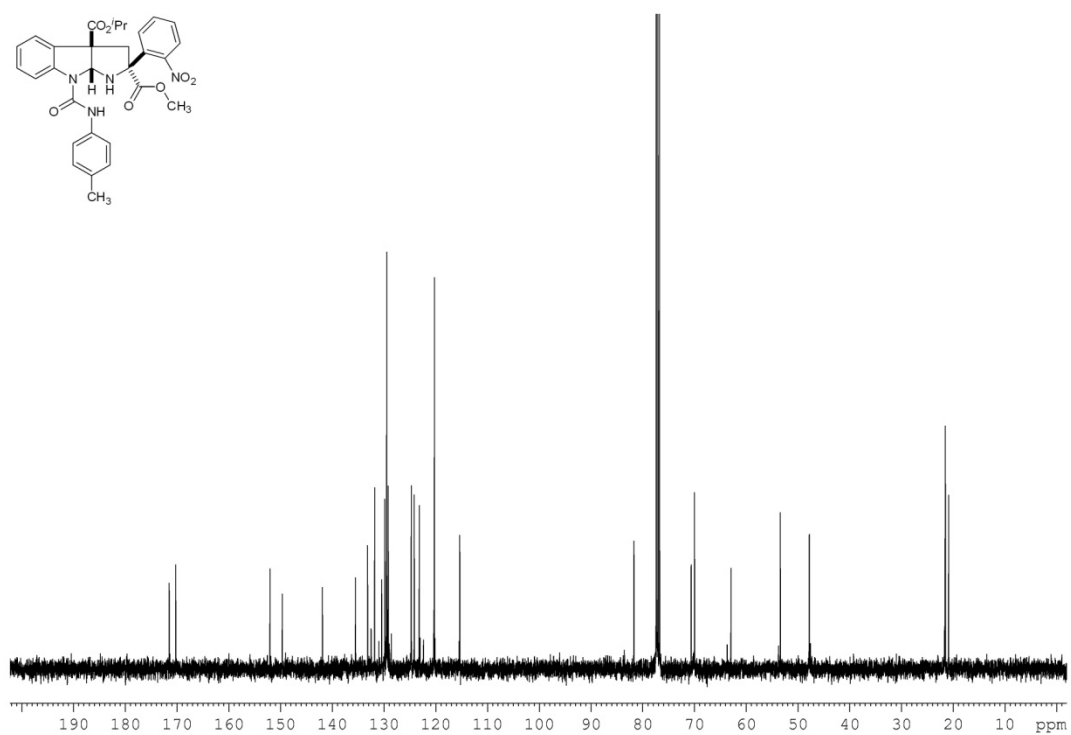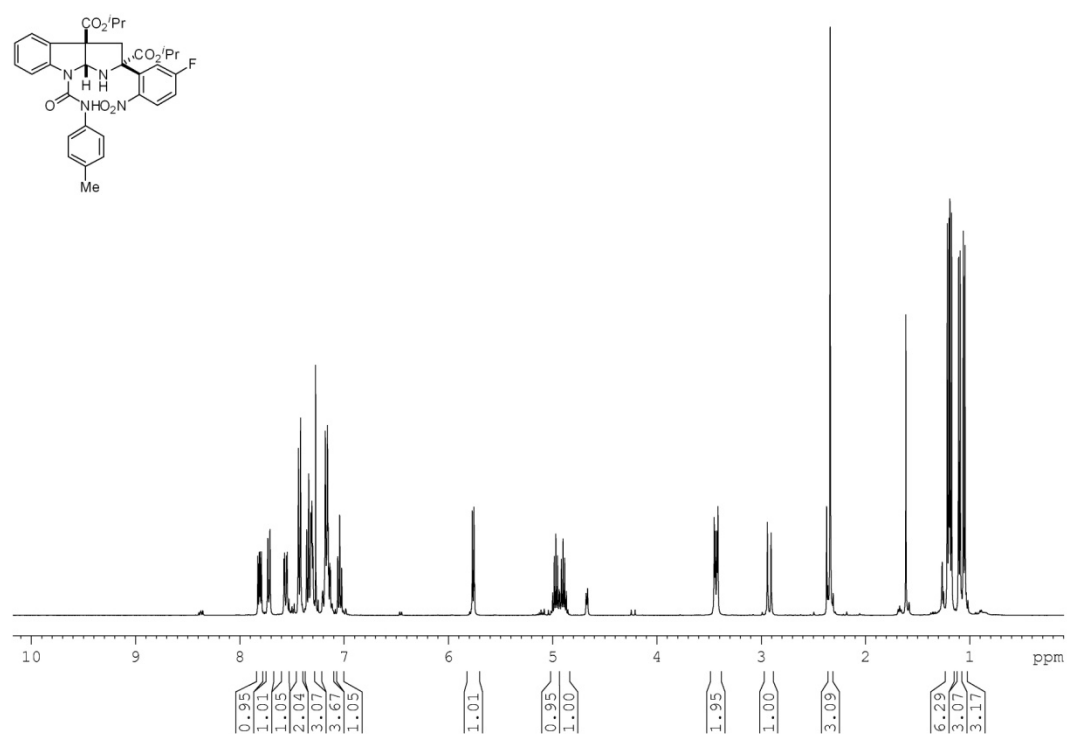

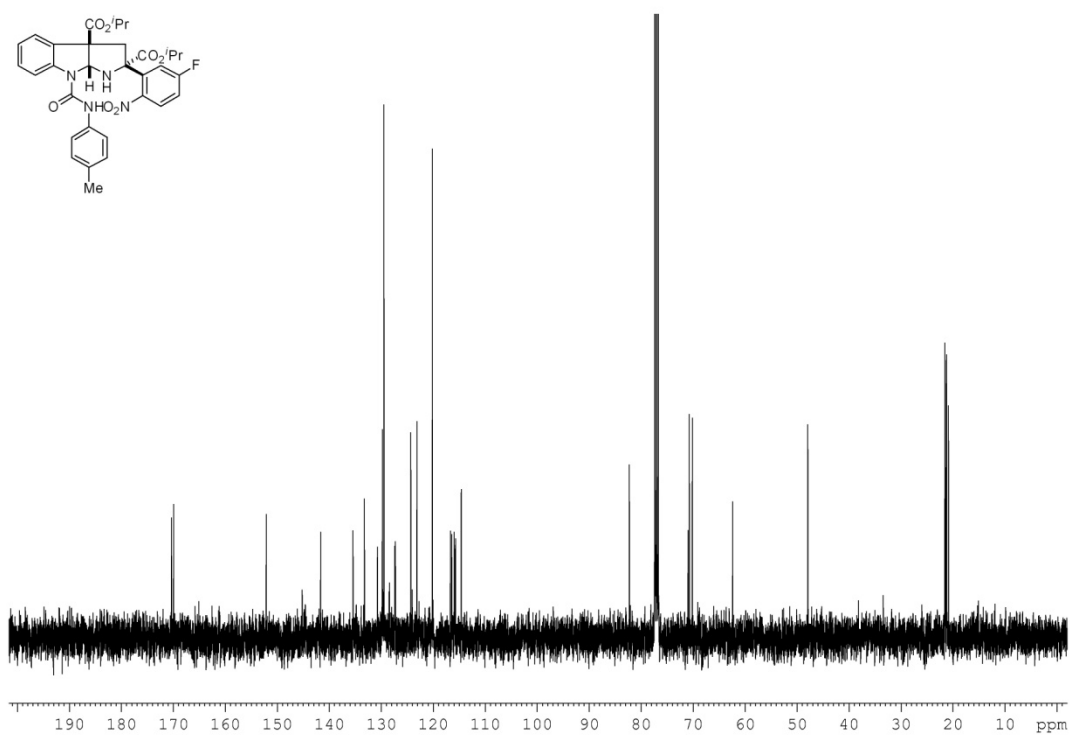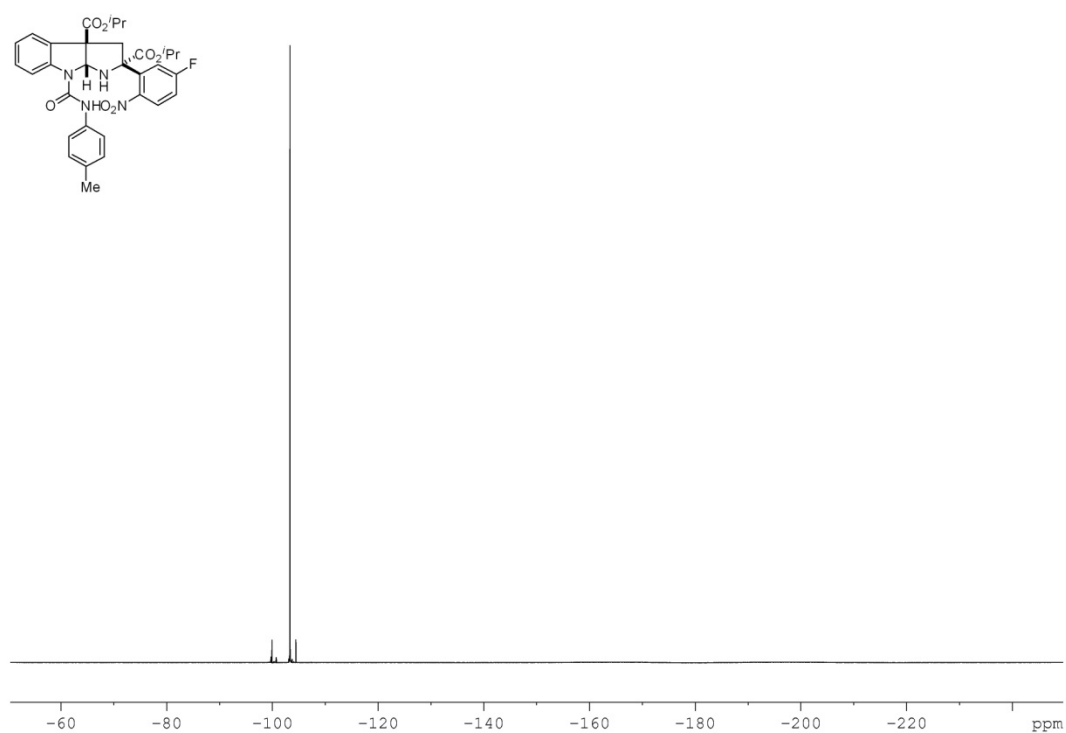

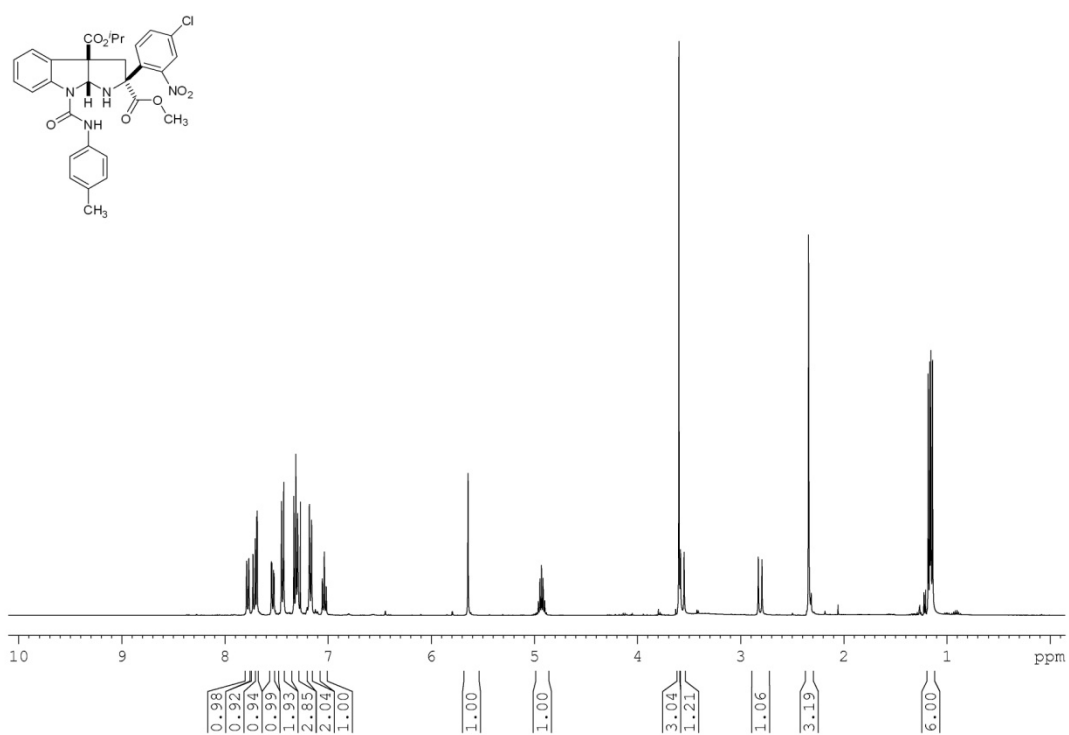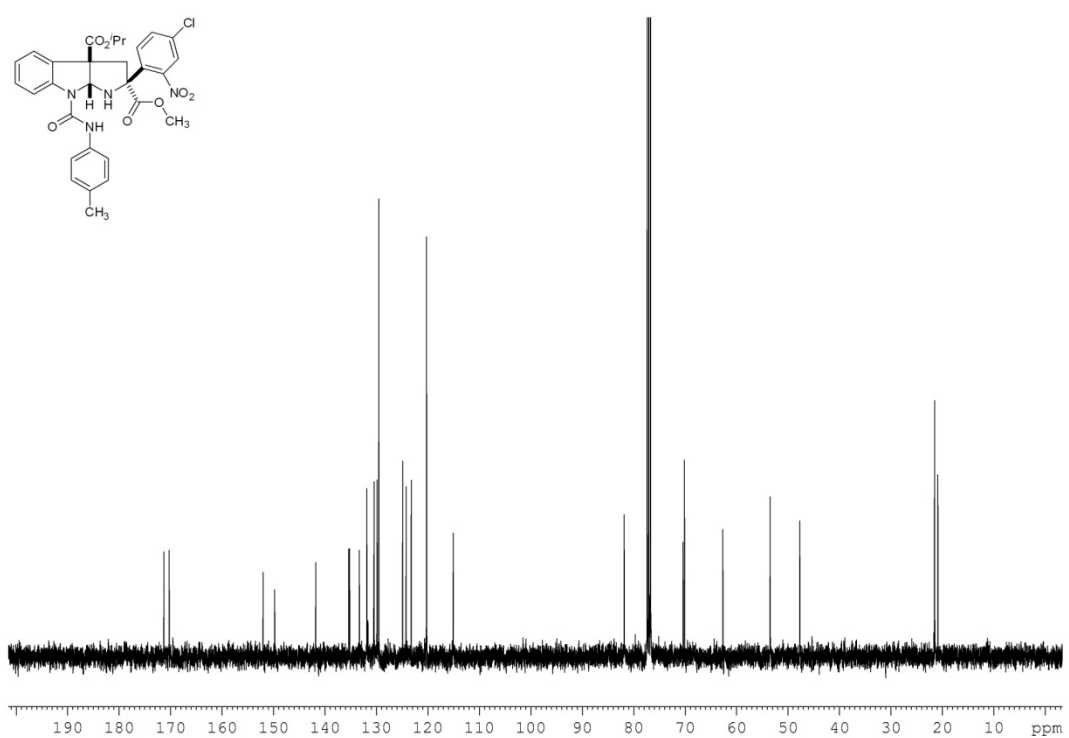

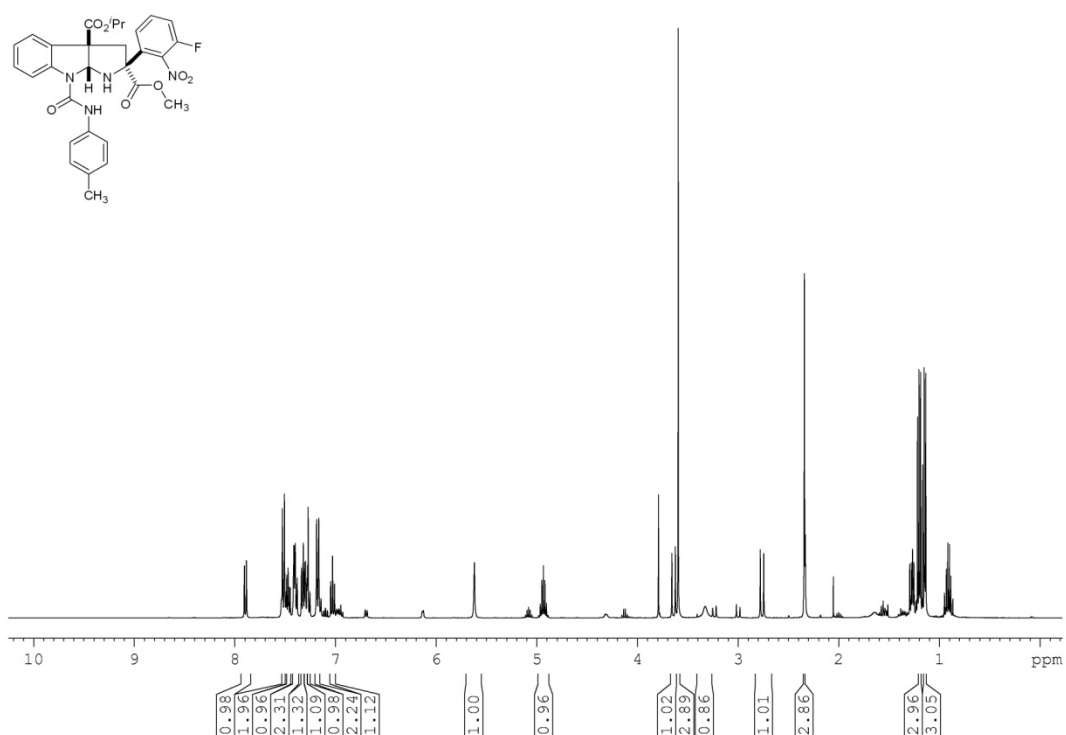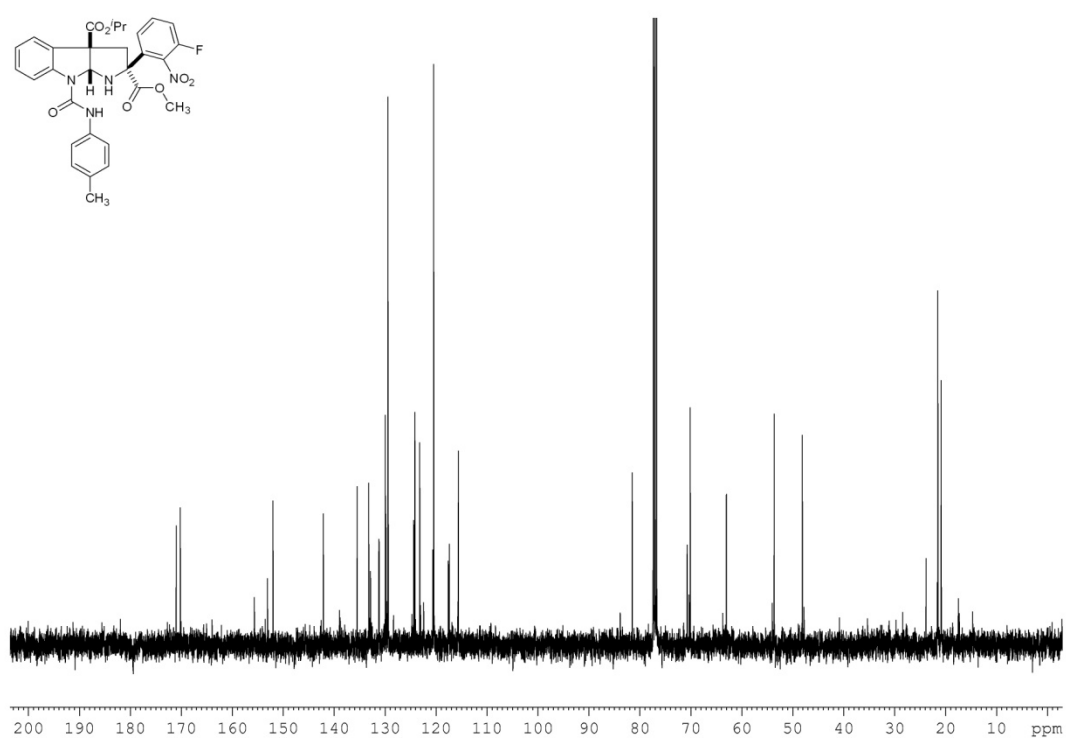

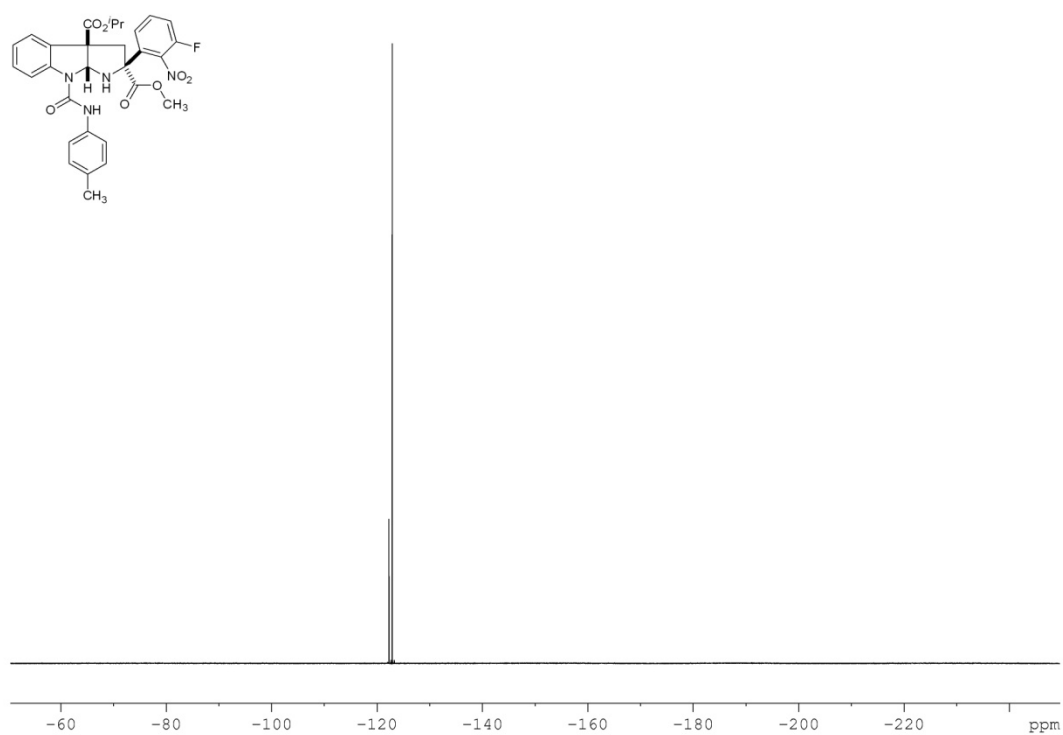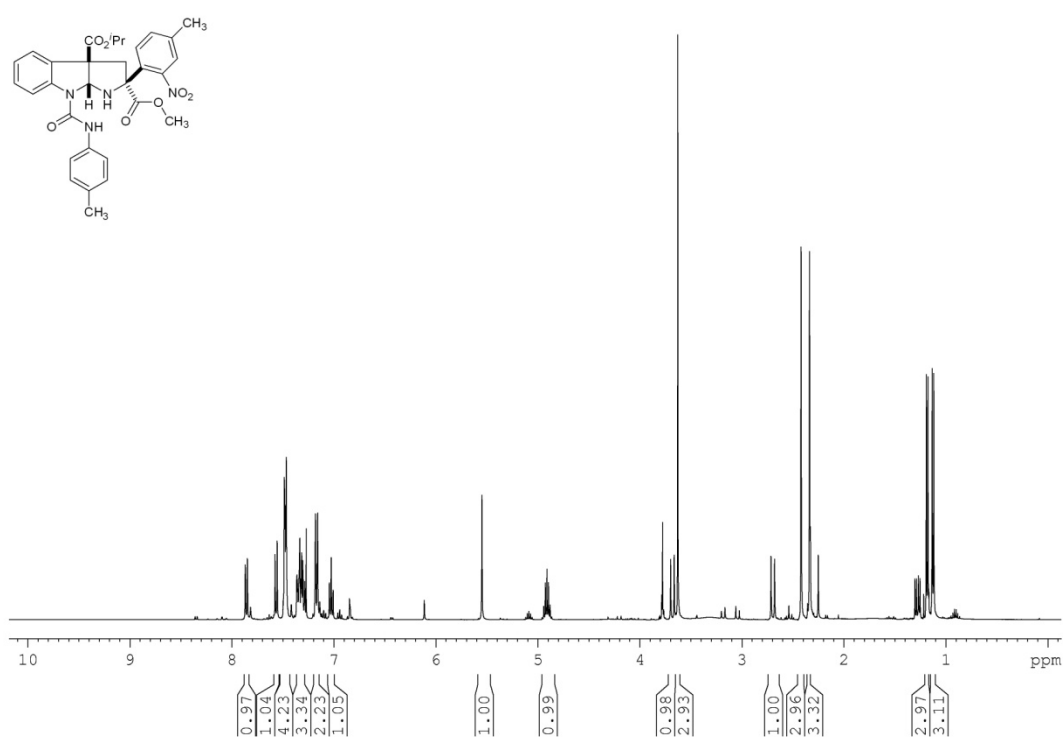

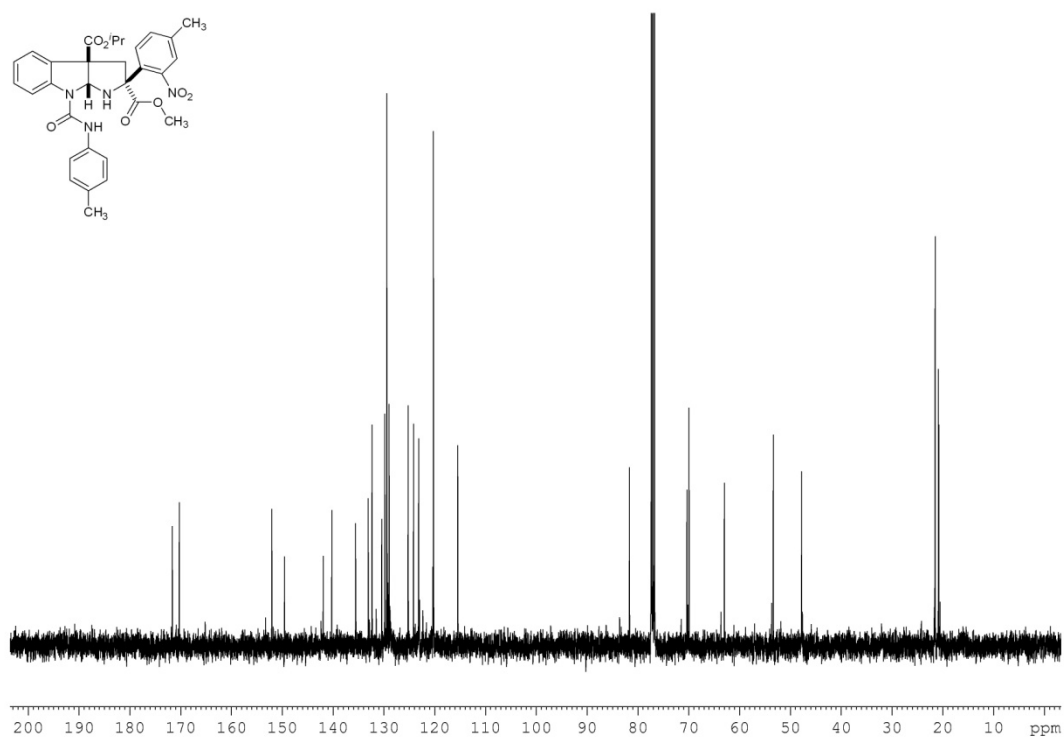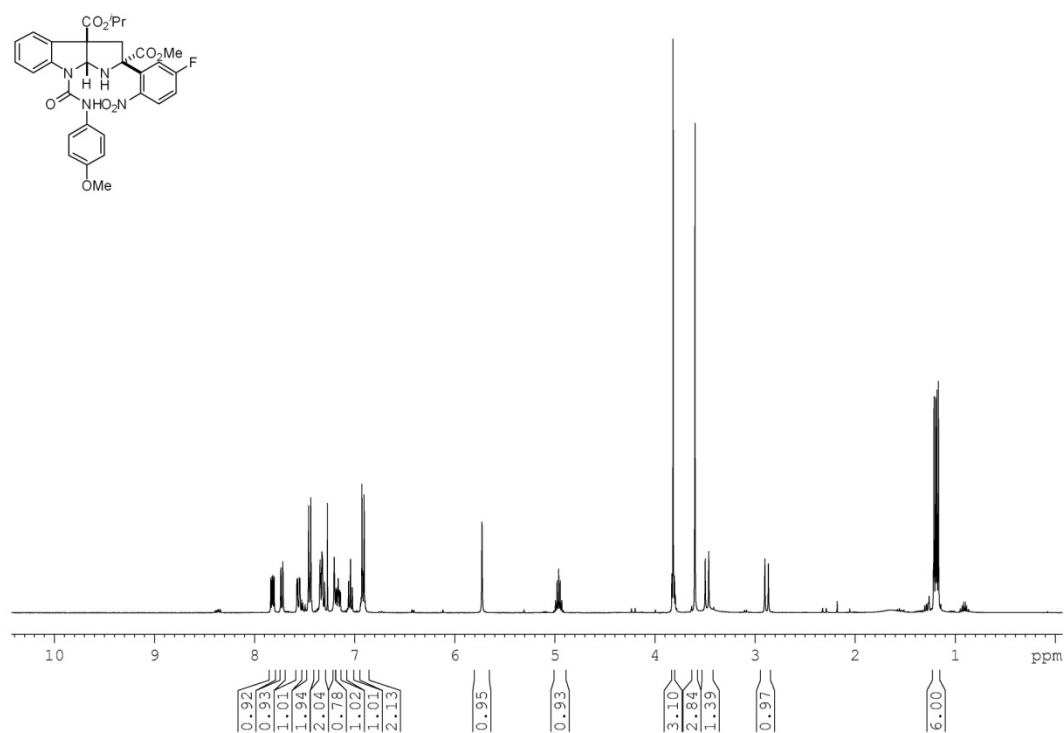

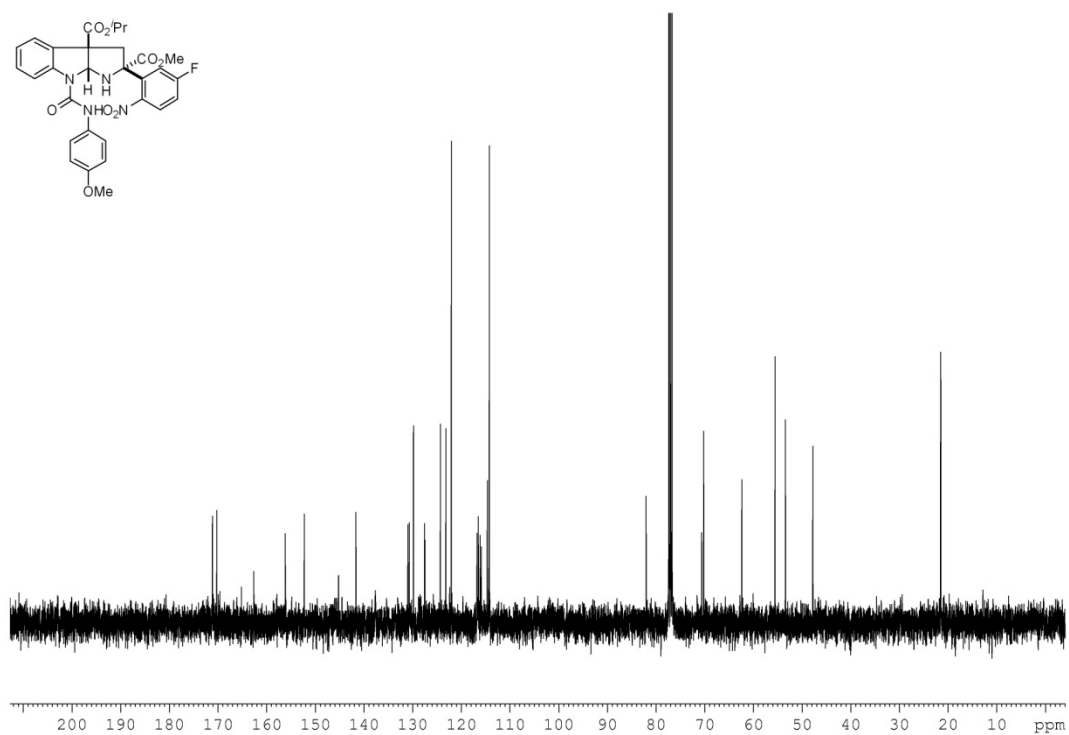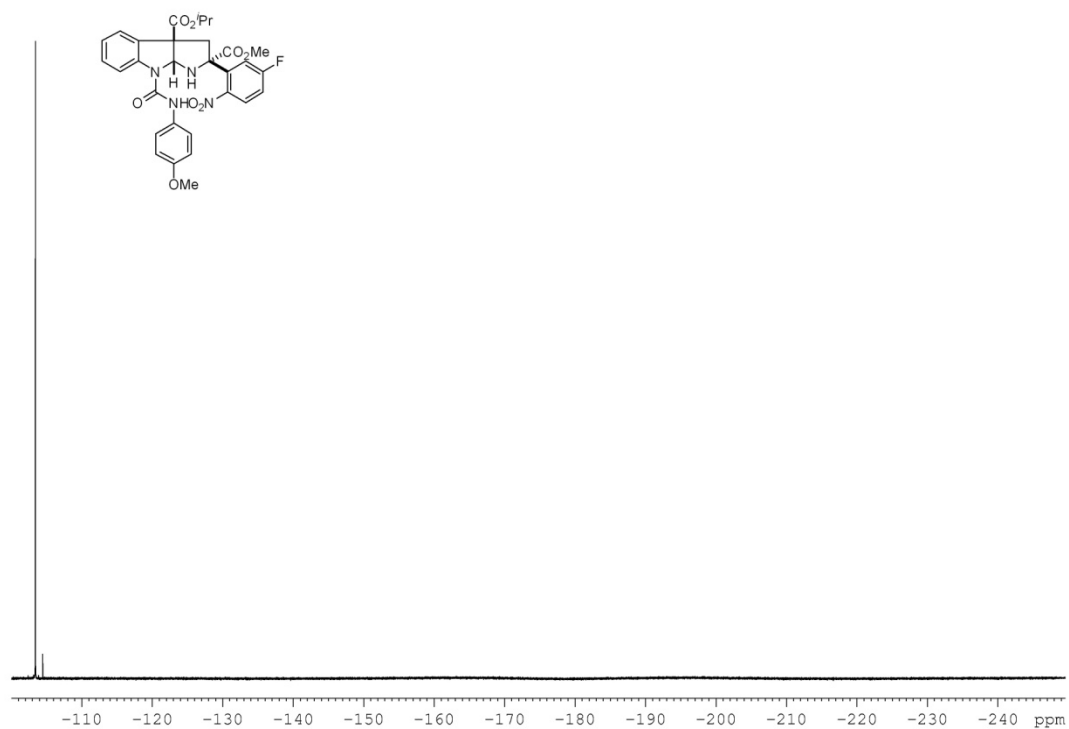

## 6. HPLC Traces

### Compound 21

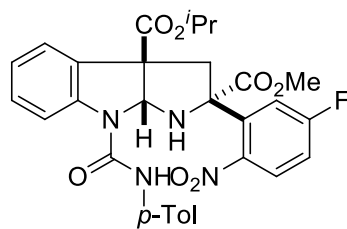

Sample solution: 1 mg/mL in IPA/hexane 1:1

Column: CHIRALPAK IC, 25 % IPA in hexane, 1 mL/min

Retention times: 18.2 min, 23.9 min

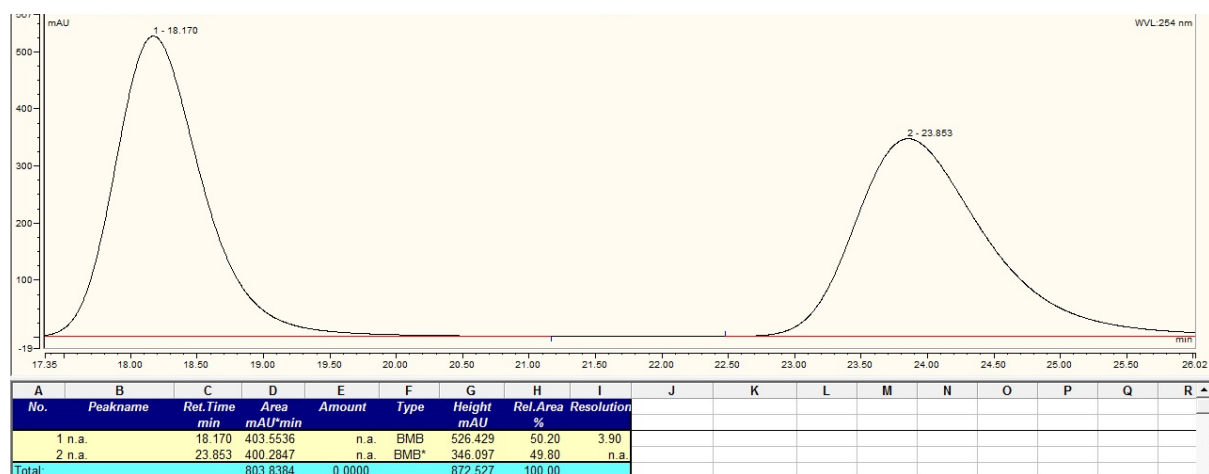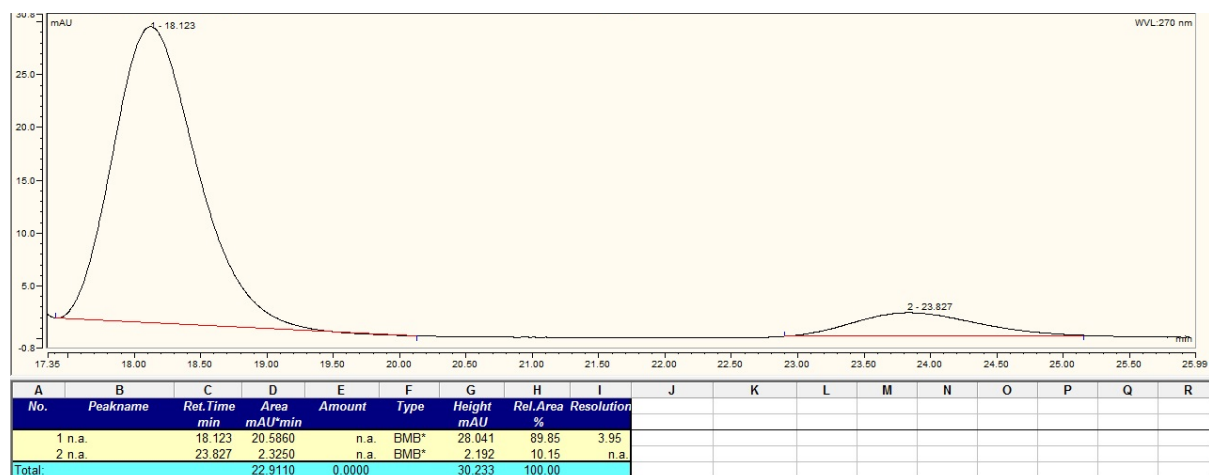



## Compound 32

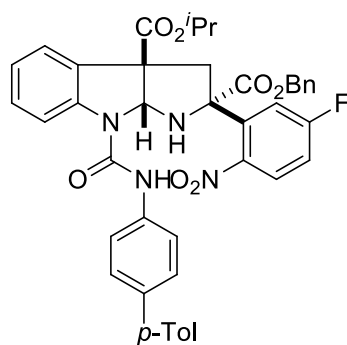

Sample solution: 1 mg/mL in IPA/hexane 1:1

Column: CHIRALPAK IC, 15 % IPA in hexane, 1 mL/min

Retention times: 23.3 min, 32.8 min

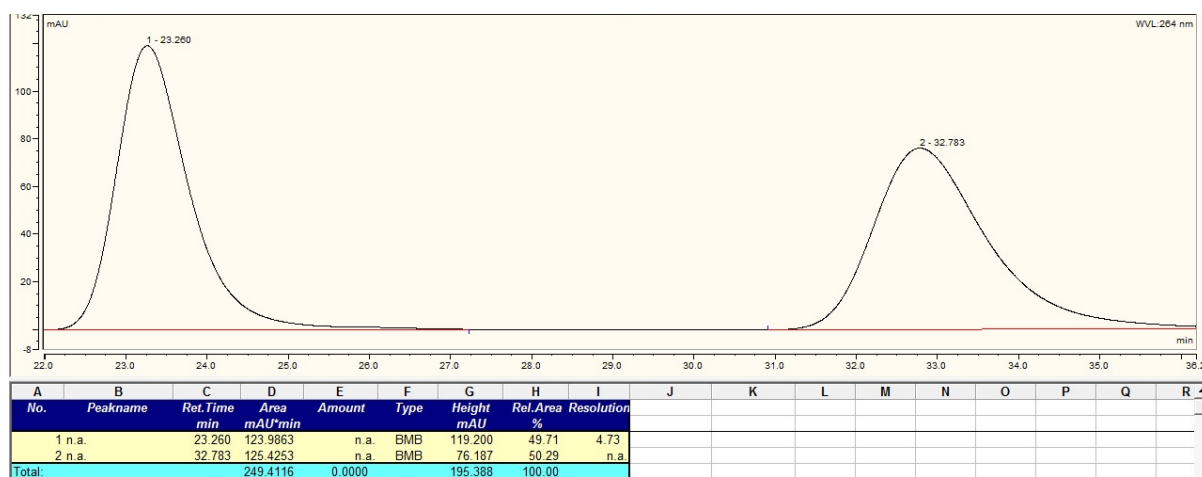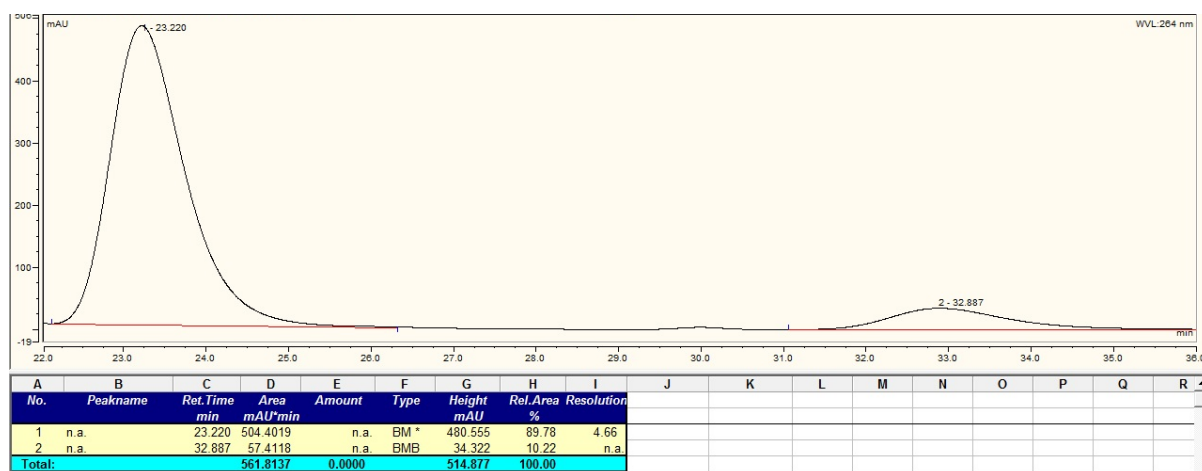

## Compound 33

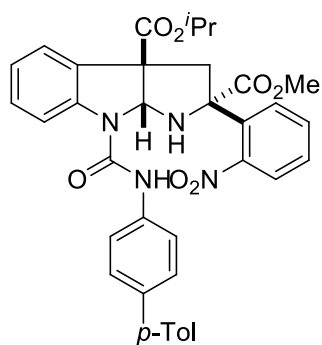

Sample solution: 1 mg/mL in IPA/hexane 1:1

Column: CHIRALPAK IC, 25 % IPA in hexane, 1 mL/min

Retention times: 30.1 min, 44.5 min

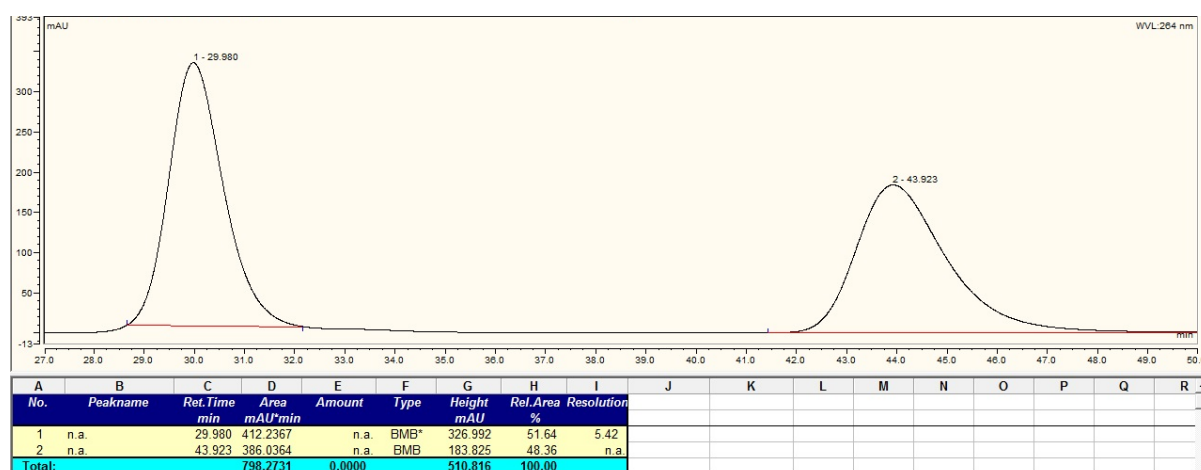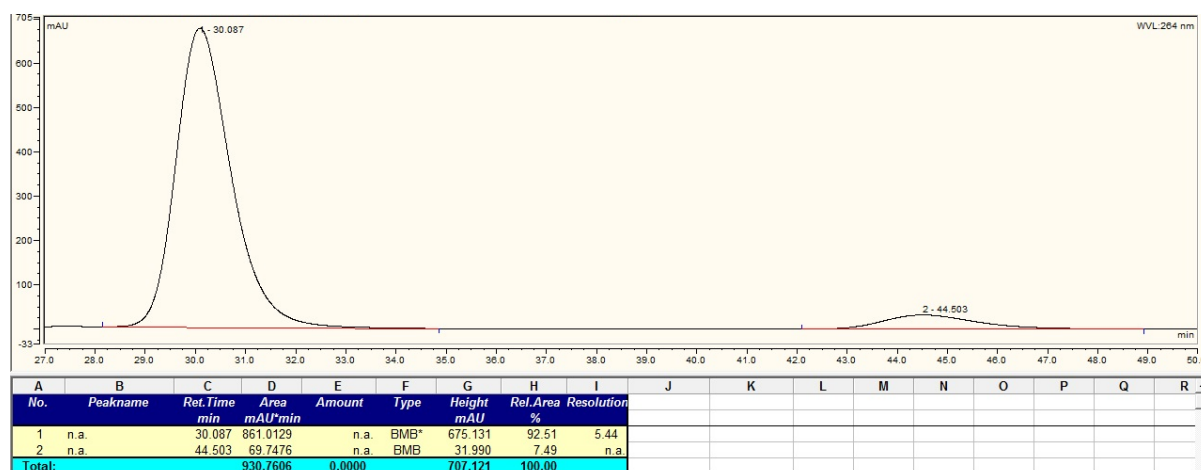

## Compound 34

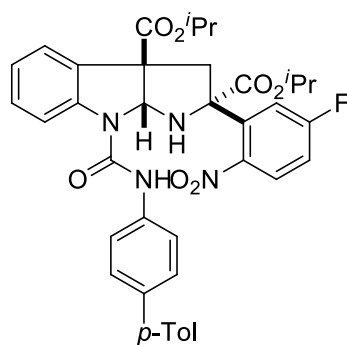

Sample solution: 1 mg/mL in IPA/hexane 1:1

Column: CHIRALPAK IC, 15 % IPA in hexane, 1 mL/min

Retention times: 16.0 min, 24.0 min

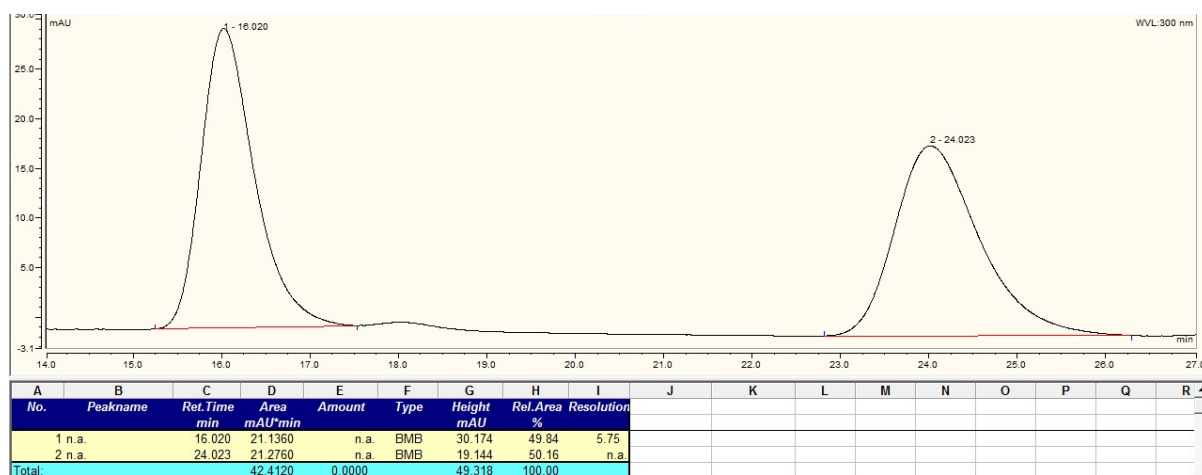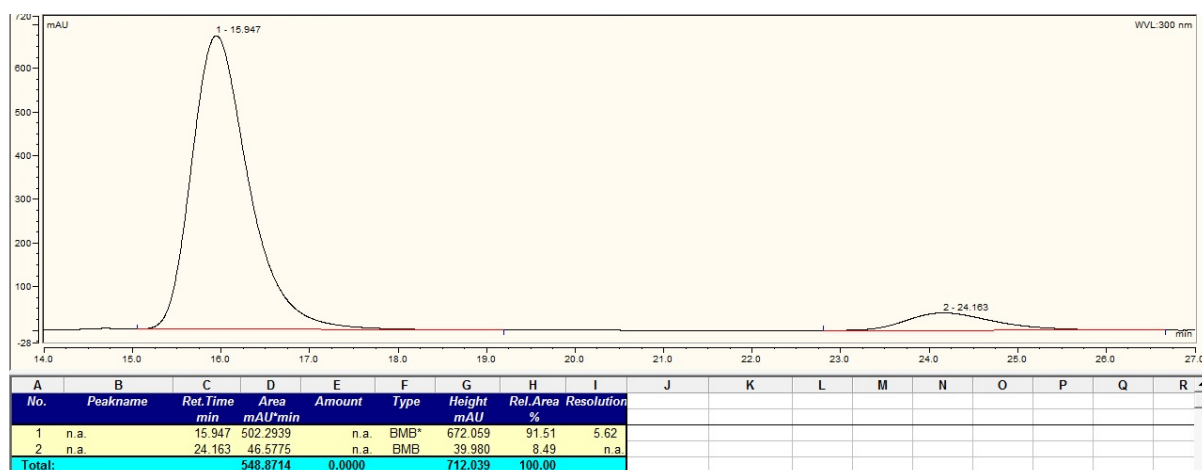

## Compound 35

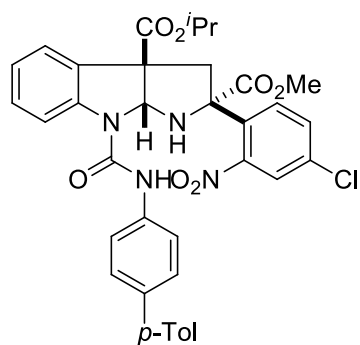

Sample solution: 1 mg/mL in IPA/hexane 1:1

Column: CHIRALPAK IC, 40 % IPA in hexane, 1 mL/min

Retention times: 19.7 min, 37.7 min

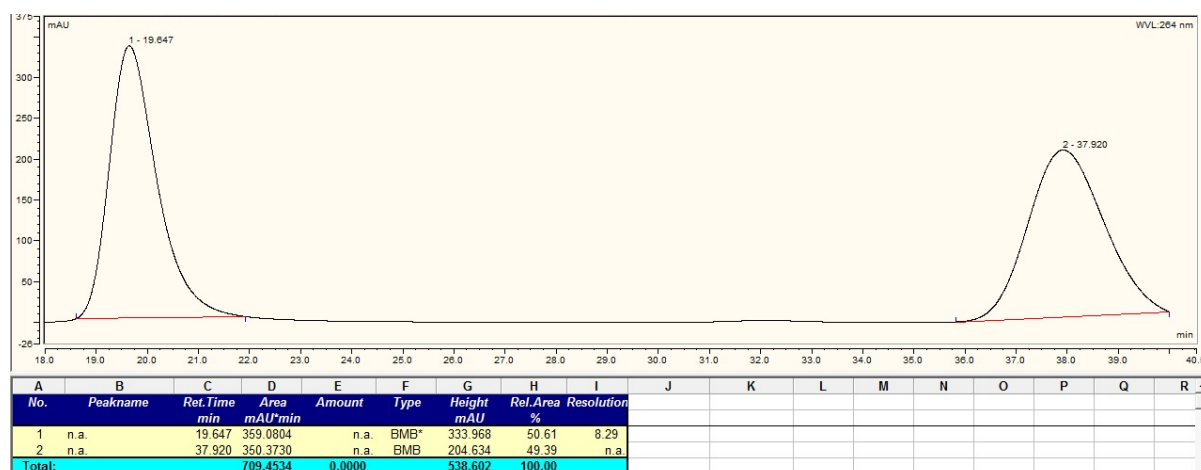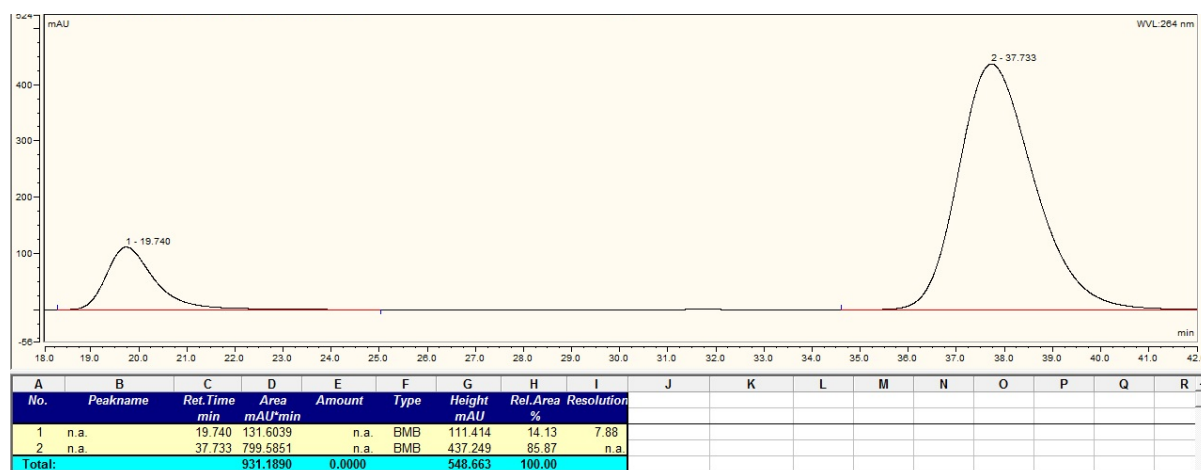

## Compound 36

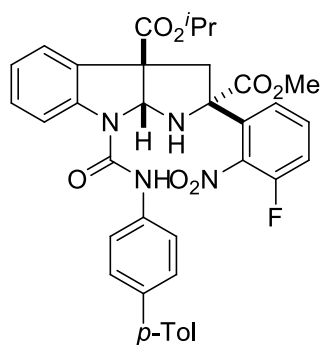

Sample solution: 1 mg/mL in IPA/hexane 1:1

Column: CHIRALPAK IC, 20 % IPA in hexane, 1 mL/min

Retention times: 16.1 min, 40.3 min

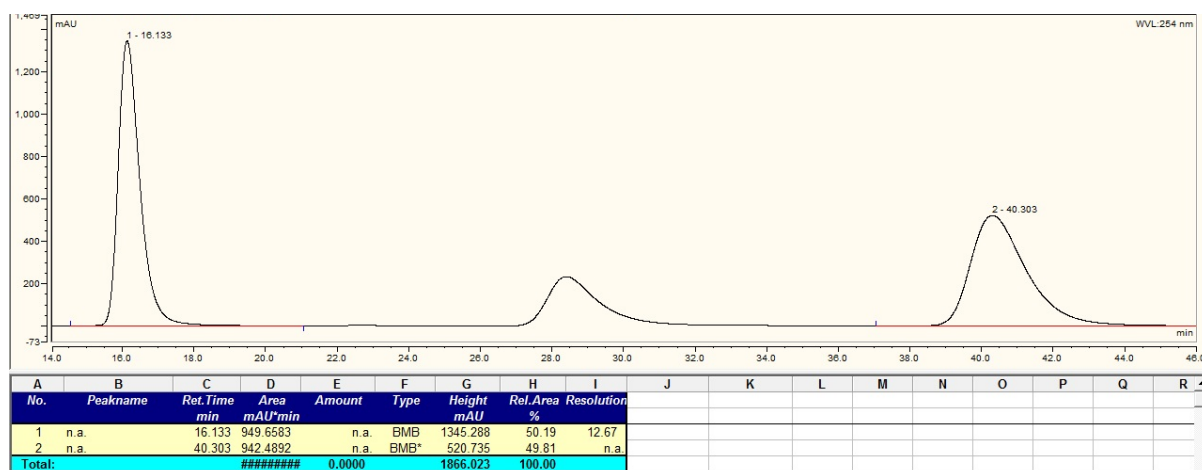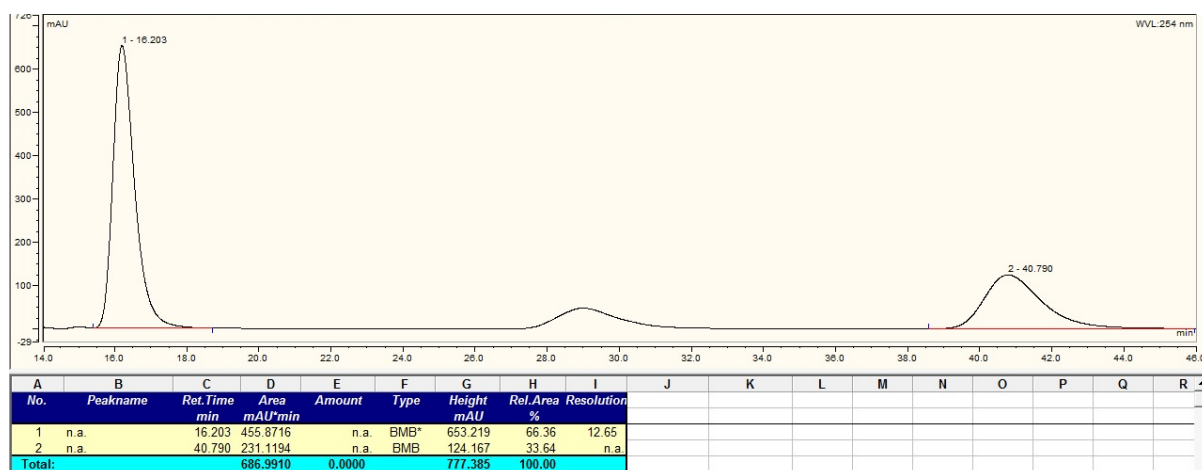

## Compound 37

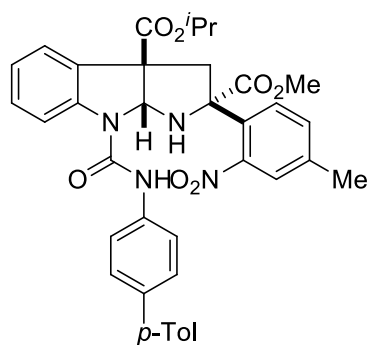

Sample solution: 1 mg/mL in IPA/hexane 1:1

Column: CHIRALPAK IC, 40 % IPA in hexane, 1 mL/min

Retention times: 17.0 min, 29.8 min

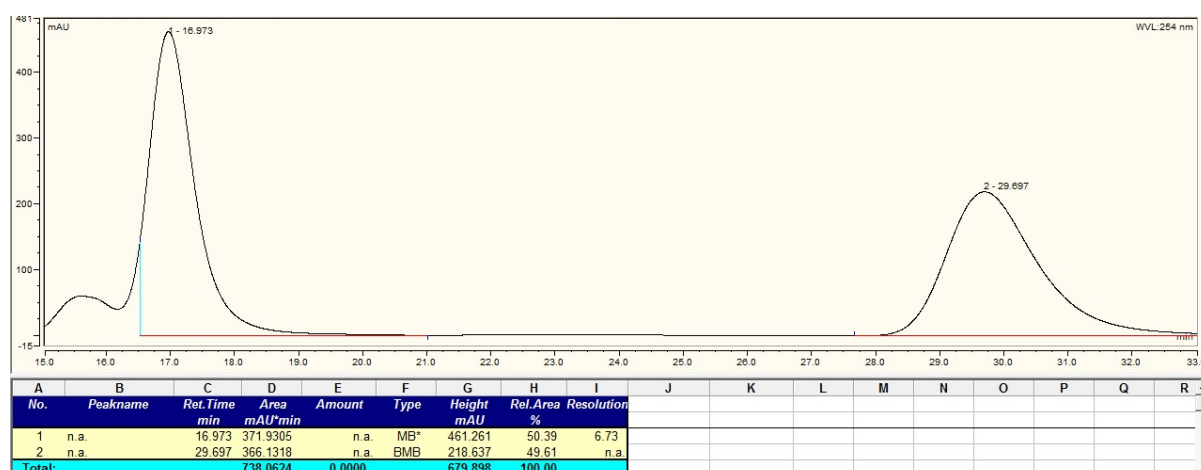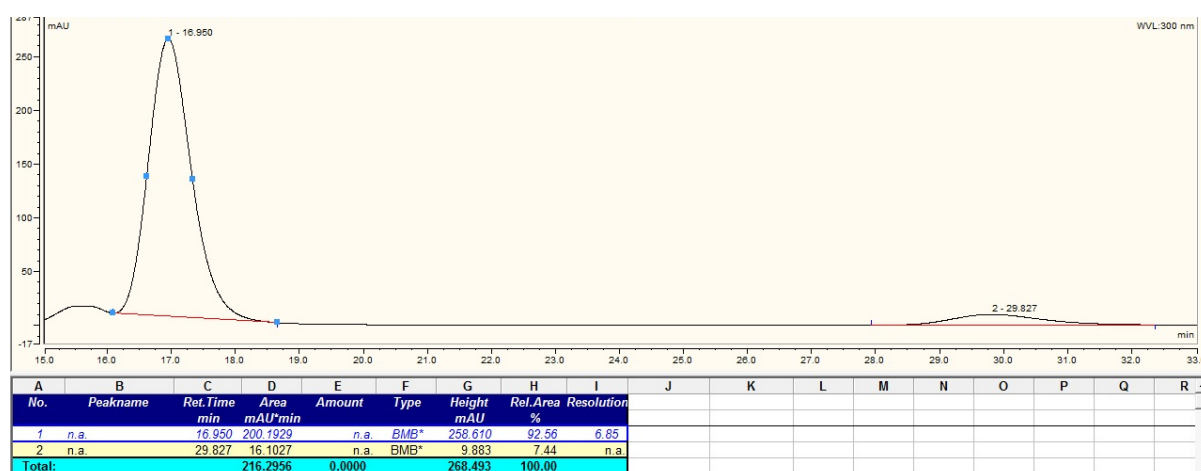

## Compound 38

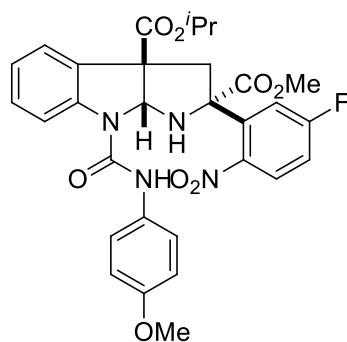

Sample solution: 1 mg/mL in IPA/hexane 1:1

Column: CHIRALPAK IC, 15 % IPA in hexane, 1 mL/min

Retention times: 64.9 min, 71.8 min

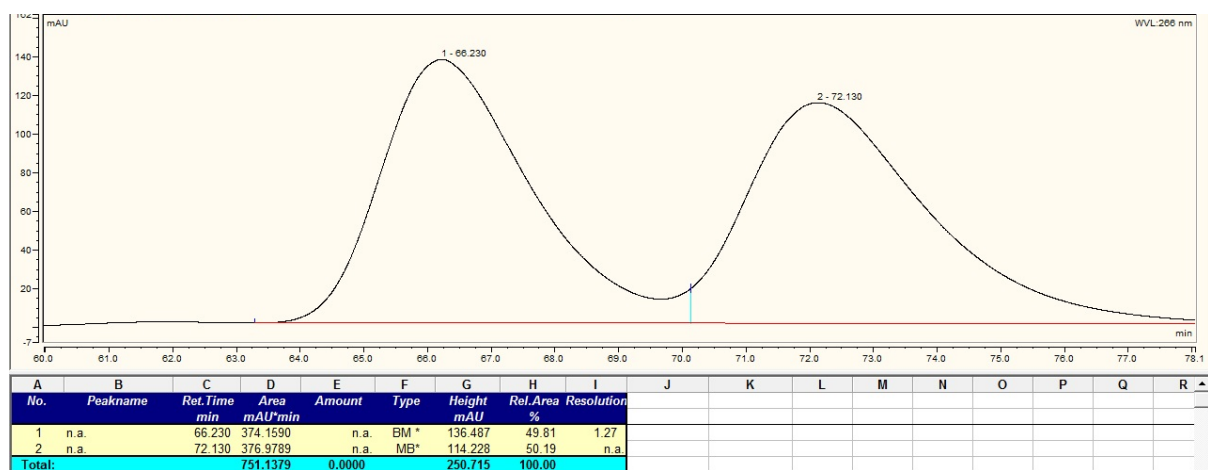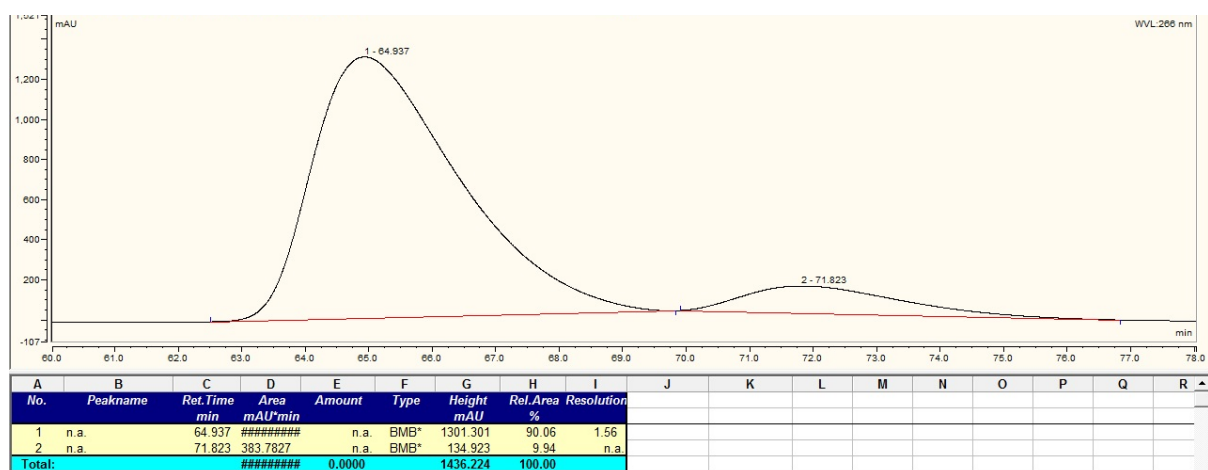

## 7. Assignment of Stereochemistry

Assignment of relative stereochemistry of compounds was done by analogy to compounds **13** and **14**, whose relative stereochemistry was unambiguously assigned by X-ray crystallography. The ring junction proton was used as a diagnostic shift in  $^1\text{H}$  NMR as follows:

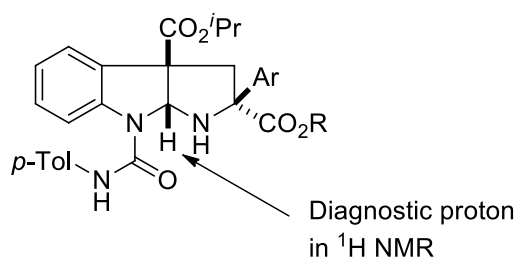

As an illustration, comparison of several compounds is shown below. The major diastereomer exhibits a shift with a lower  $\delta$  in  $^1\text{H}$  NMR.

| Compound          | $^1\text{H}$ shift<br>Major      | $^1\text{H}$ shift<br>Minor       |
|-------------------|----------------------------------|-----------------------------------|
| <b>13 (X-ray)</b> | 6.33                             | 6.41                              |
| <b>14 (X-ray)</b> | 6.40                             | 6.50                              |
| <b>16</b>         | 6.35                             | 6.45                              |
| <b>33</b>         | 5.58                             | 6.12                              |
| <b>36</b>         | 5.62                             | 6.13                              |
| <b>37</b>         | 5.55                             | 6.11                              |
|                   | <b>Lower <math>\delta</math></b> | <b>Higher <math>\delta</math></b> |



## 8. Thermodynamic Product

Information is provided for Scheme 1 in the main text. Pyrroloindoline **21** was synthesised according to Table 4 in 90:10 e.r.. The isolated product was then redissolved in toluene and TBAB (20 mol %), and  $K_2CO_3$  (5.0 eq.) was added. The reaction was stirred for 48 h, after which all pyrroloindoline **21** had been consumed and a significant amount of an unidentified compound had been formed as a single diastereomer (>20:1 d.r.). This product was isolated and a single crystal was grown. Its identity was revealed by X-ray crystallographic analysis of this crystal as being that of pyrroline **39** (CCDC number 1020474). The e.r. of **39** was found to be 90:10 using chiral stationary phase HPLC.

During the development of the methodology, we noted that exchanging the Michael acceptor from a urea bearing a 4-MeC<sub>6</sub>H<sub>4</sub>- substituent to one featuring a 3,5-(CF<sub>3</sub>)<sub>2</sub>C<sub>6</sub>H<sub>3</sub>- group led to faster formation (24 h vs 48 h) of the thermodynamic spirocyclic pyrroline compound, but as a mixture of diastereomers (9:1 d.r.). Both diastereomers were crystallised and X-ray structures were obtained (CCDC numbers 1020475 and 1020476) to confirm that the formation of this thermodynamic product is a general phenomenon.

## 9. X-ray Crystallography

### X-ray Crystallography

Crystals were mounted using the oil technique, in perfluoropolyether oil at 150(2) K (Cu and Mo) or 100(2) K (Synchrotron) with a Cryostream N<sub>2</sub> open-flow cooling device.

### Molybdenum Radiation

Single crystal X-ray diffraction data were collected using graphite monochromated Mo-K $\alpha$  radiation (0.71073 Å) using a Nonius KappaCCD diffractometer. Series of  $\mu$ -scans were generally performed to provide sufficient data in each case to a maximum resolution of 0.77 Å. Data collection and cell refinement were carried out using DENZO-SMN. Intensity data were processed and corrected for absorption effects by the multi-scan method, based on multiple scans of identical and Laue equivalent reflections using SCALEPACK (within DENZO-SMN). Structure solution was carried out with direct methods using the programs SIR9219 within the CRYSTALS software suite. Refinement was carried out using full-matrix least-squares within the CRYSTALS suite on F<sup>2</sup>. In general, all non-hydrogen atoms were refined with anisotropic displacement parameters. Hydrogen atoms were generally visible in the difference map and their positions and displacement parameters were refined using restraints prior to inclusion into the model using riding constraints.

### Copper Radiation

Single crystal X-ray diffraction data were collected using graphite monochromated Cu K radiation ( $\lambda$ = 1.54184 Å) on an Oxford Diffraction SuperNova diffractometer. Series of  $\omega$ -scans were performed in such a way as to collect all unique reflections to a maximum of 0.80 Å. Cell parameters and intensity data (including inter-frame scaling) were processed using CrysAlis Pro. The structures were solved by charge-flipping methods using SUPERFLIP and refined using full-matrix least-squares on F<sup>2</sup> within the CRYSTALS suite. All non-hydrogen atoms were refined with anisotropic displacement parameters. Hydrogen atoms were generally visible in the difference map and their positions and displacement parameters were refined using restraints prior to inclusion into the model using riding constraints.

### Synchrotron Radiation

Single crystal X-ray diffraction data were collected using silicon double crystal monochromated synchrotron radiation ( $\lambda$  = 0.68890 Å) at Diamond Light Source beamline I19 using a custom-built Rigaku diffractometer equipped with a Cryostream N<sub>2</sub> open-flow cooling device. The data were collected via a series of  $\omega$ -scans that were performed in such a way as to cover a full-sphere of data to a maximum resolution of 0.77 Å. Cell parameters and intensity data (including inter-frame scaling) were processed using CrysAlis Pro.8. The structures were solved by charge-flipping methods using SUPERFLIP and refined using full-matrix least-squares on F<sup>2</sup> within the CRYSTALS suite. All non-hydrogen atoms were refined with anisotropic displacement parameters. Hydrogen atoms were generally visible in the difference map and their positions and displacement parameters were refined using restraints prior to inclusion into the model using riding constraints.
